# Supplementary material
Source: publisher figshare collection journal article supplement (https://acs.figshare.com/ndownloader/files/3601383)
Supplement: Supplementary file 1 [file 3601383]

## Sheet: Sheet 1
Supplementary Table S6
PS corresponding to the different clusters from the k-means clustering. The name and the regulation course of clusters are shown in Fig. 5A. Table S6 corresponds to Fig. 5
Cluster 1		Cluster 2		Cluster 3		Cluster 4		Cluster 5		Cluster 6		Cluster 7		Cluster 8		Cluster 9		Cluster 10
ID	symbol	ID	symbol	ID	symbol	ID	symbol	ID	symbol	ID	symbol	ID	symbol	ID	symbol	ID	symbol	ID	symbol
1553799_at	FAM227B	1552296_at	BEST4	1007_s_at	1007_s_at	1552327_at	ARMCX4	1552578_a_at	MYO3B	1552658_a_at	NAV3	1552470_a_at	ABHD11	1552370_at	C4orf33	1552274_at	PXK	1552299_at	AK9
1555982_at	ZFYVE16	1552739_s_at	ST7L	1552287_s_at	AFG3L1P	1552347_at	CRYZL1	1553106_at	C5orf24	1553705_a_at	CHRM3	1552766_at	HS6ST2	1552485_at	LACTB	1552390_a_at	C8orf47	1552487_a_at	BNC1
1557215_at	LINC00648	1552811_at	WFIKKN1	1552343_s_at	PDE7A	1552523_a_at	TIGD4	1553122_s_at	1553122_s_at	1554020_at	BICD1	1552848_a_at	PTCHD1	1552486_s_at	LACTB	1552477_a_at	IRF6	1552532_a_at	ATP6V1C2
1558508_a_at	C1orf53	1552878_at	ATOH7	1552375_at	ZNF333	1552634_a_at	ZNF101	1553541_at	LMX1A	1554299_at	NPAS4	1552849_at	M1AP	1552496_a_at	COBL	1552481_s_at	MAN1A2	1552557_a_at	ZDHHC15
1563209_a_at	MACROD2	1552879_a_at	ATOH7	1552381_at	SRSF12	1552684_a_at	SENP8	1553575_at	ND6	1554524_a_at	OLFM3	1553055_a_at	SLFN5	1552611_a_at	JAK1	1552519_at	ACVR1C	1552583_s_at	ABCC13
1569652_at	MLLT3	1553167_a_at	SEPSECS	1552457_a_at	ADAMTSL1	1552822_at	TMX3	1554629_at	EPHA7	1554526_at	OLFM3	1553132_a_at	TC2N	1552670_a_at	PPP1R3B	1552618_at	STX6	1552685_a_at	GRHL1
201015_s_at	JUP	1553202_at	STOX1	1552506_at	CRB2	1553112_s_at	CDK8	1555257_a_at	MYO3B	1554640_at	PALM2	1553151_at	ATP6V0D2	1552678_a_at	USP28	1552626_a_at	TMEM163	1552726_at	ADAMTS17
202156_s_at	CELF2	1553269_at	ZNF718	1552520_at	TMEM74	1553113_s_at	CDK8	1555436_a_at	AFF4	1554863_s_at	DOK5	1553153_at	ATP6V0D2	1552695_a_at	SLC2A13	1552691_at	ARL11	1552752_a_at	CADM2
202181_at	KIAA0247	1553407_at	MACF1	1552521_a_at	TMEM74	1553192_at	ZNF441	1555448_at	AP5M1	1555345_at	SLC38A4	1553299_at	DUSP5P1	1552712_a_at	NMNAT2	1552694_at	SLC2A13	1552922_at	RIMS1
202350_s_at	202350_s_at	1553411_s_at	SALL3	1552522_at	TIGD4	1553193_at	ZNF441	1555724_s_at	TAGLN	1556421_at	LOC286189	1553321_a_at	SULT1C4	1552714_at	CREG2	1552727_s_at	ADAMTS17	1553171_x_at	LRRN4
202966_at	CAPN6	1553447_at	AGBL1	1552562_at	ZNF570	1553227_s_at	BRWD1	1556204_a_at	ZNF814	1557369_a_at	LINC00698	1553394_a_at	TFAP2B	1552736_a_at	NETO1	1552733_at	KLHDC1	1553179_at	ADAMTS19
203075_at	SMAD2	1553710_at	FAM218A	1552575_a_at	C6orf141	1553274_a_at	SNRNP48	1556325_at	FILIP1	1557538_at	1557538_at	1553485_at	CCDC140	1552767_a_at	HS6ST2	1552754_a_at	CADM2	1553180_at	ADAMTS19
203504_s_at	ABCA1	1553764_a_at	AJUBA	1552632_a_at	ARSG	1553400_a_at	CRHR1-IT1	1557278_s_at	TNPO1	1559633_a_at	CHRM3	1553614_a_at	FLJ25694	1552925_at	PCDH10	1553102_a_at	CCDC69	1553333_at	MAB21L3
203695_s_at	DFNA5	1553798_a_at	FBXL13	1552734_at	RICTOR	1553693_s_at	CBR4	1557543_at	1557543_at	1560019_at	DLGAP1-AS2	1553639_a_at	PPARGC1B	1553027_a_at	KLHL4	1553141_at	LACC1	1553392_at	EFCAB3
204072_s_at	FRY	1553881_at	MGC16142	1552742_at	KCNH8	1553726_s_at	TBC1D32	1557765_at	LINC01021	1561985_at	C14orf39	1553713_a_at	RHEBL1	1553155_x_at	ATP6V0D2	1553142_at	LACC1	1553605_a_at	ABCA13
204573_at	CROT	1554098_at	SPIN3	1552789_at	SEC62	1553743_at	1553743_at	1558365_at	PGK1	1562301_at	C8orf34	1553734_at	AK7	1553158_at	CEP19	1553169_at	LRRN4	1553746_a_at	OTOGL
205710_at	LRP2	1554099_a_at	SPIN3	1552790_a_at	SEC62	1553772_at	GK5	1558606_s_at	1558606_s_at	1563015_at	1563015_at	1553997_a_at	ASPHD1	1553328_a_at	SLC18A2	1553243_at	ITIH5	1553749_at	FAM76B
205883_at	ZBTB16	1554116_s_at	PARP11	1552867_at	1552867_at	1553894_at	CCDC122	1559270_at	ZFHX4	1563369_at	LINC00173	1554026_a_at	MYO10	1553613_s_at	FOXC1	1553422_s_at	RBFOX1	1553830_s_at	1553830_s_at
206070_s_at	EPHA3	1554607_at	CNKSR2	1552897_a_at	KCNG3	1553974_at	C22orf39	1559394_a_at	1559394_a_at	1563720_at	1563720_at	1554079_at	GALNT18	1553652_a_at	C18orf54	1553423_a_at	SLFN13	1553977_a_at	CYP39A1
206117_at	TPM1	1554636_at	1554636_at	1553099_at	TIGD1	1554021_a_at	ZNF12	1559515_at	1559515_at	1564964_at	1564964_at	1554308_s_at	GABRA2	1553654_at	SYT14	1553494_at	TDH	1554140_at	WDR78
206140_at	LHX2	1554722_at	TRPM3	1553145_at	TAPT1-AS1	1554043_a_at	1554043_a_at	1559910_at	1559910_at	1569054_at	SLC1A3	1554478_a_at	HEATR3	1553801_a_at	DTD2	1553500_at	FBXL21	1554234_at	KATNAL2
206343_s_at	NRG1	1555057_at	NDUFS4	1553148_a_at	SNX13	1554057_at	ASH1L-AS1	1559965_at	ZFHX4-AS1	1569178_at	GRIA4	1554486_a_at	GFOD1	1553972_a_at	CBS	1553602_at	MUCL1	1554246_at	C1orf210
206345_s_at	PON1	1555318_at	HIF3A	1553218_a_at	ZNF512	1554101_a_at	TMTC4	1559966_a_at	ZFHX4-AS1	1569372_at	LOC100507194	1554547_at	FAM13C	1553976_a_at	DPCD	1553720_a_at	AMER2	1554300_a_at	SVOPL
207002_s_at	PLAGL1	1555388_s_at	SNX25	1553247_a_at	ZNF709	1554102_a_at	TMTC4	1560411_at	1560411_at	1569472_s_at	1569472_s_at	1554776_at	ZFP42	1553991_s_at	VSIG10	1553768_a_at	DCBLD1	1554418_s_at	SPOCK3
207308_at	SLCO1A2	1555630_a_at	1555630_a_at	1553286_at	ZNF555	1554155_at	MCPH1	1560788_at	MYO3B	200737_at	PGK1	1554777_at	ZFP42	1554062_at	XG	1553978_at	MEF2BNB	1554556_a_at	ATP11B
208241_at	NRG1	1555800_at	ZNF385B	1553292_s_at	SGK494	1554182_at	1554182_at	1560916_a_at	DPY19L1	201204_s_at	RRBP1	1554887_at	1554887_at	1554168_a_at	SH3KBP1	1553986_at	RASEF	1554557_at	ATP11B
209119_x_at	NR2F2	1555801_s_at	ZNF385B	1553349_at	ARID2	1554199_at	PTPRO	1561114_a_at	DEPDC4	201324_at	EMP1	1555274_a_at	EPT1	1554283_at	CCRN4L	1553989_a_at	ATP6V1C2	1554966_a_at	FILIP1L
209120_at	NR2F2	1555831_s_at	LRRC41	1553564_at	MACROD2	1554206_at	TMLHE	1561759_at	LOC645513	201325_s_at	EMP1	1555355_a_at	ETS1	1554352_s_at	DENND4A	1554411_at	CTNNB1	1555299_s_at	ERVW-1
209121_x_at	NR2F2	1555841_at	MSANTD3	1553581_s_at	SREK1IP1	1554241_at	COCH	1561761_x_at	LOC645513	201467_s_at	NQO1	1555526_a_at	SEPT6	1554474_a_at	MOXD1	1554586_a_at	RHOBTB2	1555310_a_at	PAK6
209124_at	MYD88	1555842_at	CYTH2	1553634_a_at	WEE2-AS1	1554248_at	ZNF638	1561829_at	1561829_at	201468_s_at	NQO1	1555602_a_at	ELAVL3	1554482_a_at	SAR1B	1554774_at	MINA	1555533_at	QRFPR
209793_at	GRIA1	1555872_a_at	1555872_a_at	1553696_s_at	ZNF569	1554249_a_at	ZNF638	1563601_at	1563601_at	201601_x_at	201601_x_at	1555765_a_at	GNG4	1554485_s_at	TMEM37	1554807_a_at	SPIRE1	1555778_a_at	POSTN
209867_s_at	LPHN3	1555874_x_at	MGC21881	1553750_a_at	FAM76B	1554250_s_at	TRIM73	1564039_at	ZSCAN23	201631_s_at	IER3	1555867_at	GNG4	1554509_a_at	FAM188A	1554878_a_at	ABCD3	1555929_s_at	1555929_s_at
209988_s_at	ASCL1	1555882_at	SPIN3	1553759_at	MCM9	1554348_s_at	CDKN2AIPNL	1564220_a_at	LOC100506465	202202_s_at	LAMA4	1555950_a_at	CD55	1554539_a_at	RHOF	1554915_a_at	PDE12	1556037_s_at	HHIP
210095_s_at	IGFBP3	1556033_at	1556033_at	1553957_at	ZNF564	1554472_a_at	PHF20L1	1566638_at	1566638_at	202311_s_at	COL1A1	1556213_a_at	BTG3	1554549_a_at	WDR20	1555058_a_at	LPGAT1	1556210_at	1556210_at
210179_at	KCNJ13	1556042_s_at	LOC338799	1554012_at	RSPO2	1554614_a_at	PTBP2	1566867_at	1566867_at	202393_s_at	KLF10	1556220_at	1556220_at	1554655_a_at	RPRML	1555151_s_at	TDH	1556371_at	OLIG3
210278_s_at	AP4S1	1556055_at	1556055_at	1554108_at	1554108_at	1554638_at	ZFYVE16	1568603_at	CADPS	202450_s_at	CTSK	1556221_a_at	1556221_a_at	1554690_a_at	TACC1	1555246_a_at	SCN1A	1556606_at	NAV2
210447_at	GLUD2	1556105_at	1556105_at	1554154_at	GDAP2	1554703_at	ARHGEF10	1568604_a_at	CADPS	202936_s_at	SOX9	1556469_s_at	1556469_s_at	1554748_at	CLCNKB	1555412_at	FBXL21	1556764_s_at	1556764_s_at
210609_s_at	TP53I3	1556125_at	1556125_at	1554176_a_at	C3orf33	1554780_a_at	PHTF2	1568736_s_at	1568736_s_at	203037_s_at	MTSS1	1556499_s_at	COL1A1	1554873_at	CSPP1	1555443_at	CCDC172	1556827_at	LPP-AS2
211219_s_at	LHX2	1556126_s_at	1556126_s_at	1554309_at	EIF4G3	1554889_at	TIA1	1569022_a_at	PIK3C2A	203178_at	GATM	1556629_a_at	SNAP25	1554919_s_at	C7orf63	1555559_s_at	USP25	1557038_s_at	UBAC2-AS1
211427_s_at	KCNJ13	1556144_at	DHX30	1554314_at	C6orf141	1554948_at	1554948_at	1569262_x_at	UBE3D	203180_at	ALDH1A3	1557014_a_at	FAM201A	1554980_a_at	ATF3	1555829_at	ESYT2	1557055_s_at	LOC643837
211432_s_at	TYRO3	1556160_a_at	1556160_a_at	1554328_at	STXBP4	1555125_at	PAXBP1	1569342_at	GLI3	203231_s_at	ATXN1	1557411_s_at	SLC25A43	1555039_a_at	ABCC4	1555830_s_at	ESYT2	1557256_a_at	1557256_a_at
211480_s_at	SLCO1A2	1556432_at	1556432_at	1554329_x_at	STXBP4	1555363_s_at	LINC00663	1569484_s_at	MDN1	203232_s_at	ATXN1	1557458_s_at	SHB	1555216_a_at	1555216_a_at	1555832_s_at	KLF6	1558007_s_at	LOC100506655
212143_s_at	IGFBP3	1556659_at	1556659_at	1554449_at	MIER3	1555476_at	IREB2	1569538_at	1569538_at	203649_s_at	PLA2G2A	1558378_a_at	AHNAK2	1555544_a_at	CADM2	1555894_s_at	MTSS1L	1558199_at	FN1
212148_at	PBX1	1556744_a_at	1556744_a_at	1554450_s_at	MIER3	1555560_at	UGGT2	1569788_at	ST8SIA1	203650_at	PROCR	1558444_at	1558444_at	1555573_at	TTC40	1555962_at	B3GNT7	1558523_at	FAM184A
212598_at	WDFY3	1556818_at	1556818_at	1554479_a_at	CARD8	1555562_a_at	ZCCHC7	1570515_a_at	FILIP1	203881_s_at	DMD	1558522_at	1558522_at	1555679_a_at	RTN4IP1	1555963_x_at	B3GNT7	1558689_a_at	LOC441461
212602_at	WDFY3	1556883_a_at	LOC440896	1554507_at	NAALAD2	1556007_s_at	CSNK1A1	201008_s_at	TXNIP	203886_s_at	FBLN2	1559280_a_at	LOC100506013	1555725_a_at	RGS5	1555976_s_at	MYL12A	1558964_at	FAT3
212762_s_at	TCF7L2	1556927_at	KCNK10	1554543_at	SPAG9	1556021_at	GPR180	201009_s_at	TXNIP	204279_at	PSMB9	1559883_s_at	SAMHD1	1555731_a_at	AP1S3	1556194_a_at	1556194_a_at	1559322_at	LOC727916
212867_at	NCOA2	1557003_at	TTC23L	1554609_at	LOC100287896	1556035_s_at	ZNF207	201010_s_at	TXNIP	204347_at	204347_at	1560017_at	TMTC3	1555733_s_at	AP1S3	1556211_a_at	1556211_a_at	1559477_s_at	MEIS1
213422_s_at	MXRA8	1557071_s_at	NUB1	1554663_a_at	NUMA1	1556051_a_at	BICD1	201185_at	HTRA1	204471_at	GAP43	1561242_at	1561242_at	1555764_s_at	TIMM10	1556212_x_at	1556212_x_at	1559776_at	1559776_at
215073_s_at	NR2F2	1557104_at	ZSCAN30	1554686_at	STAU2	1556097_at	HOMER2	202112_at	VWF	204689_at	HHEX	1561615_s_at	SLC8A1	1555797_a_at	ARPC5	1556283_s_at	FGFR1OP2	1559822_s_at	MTDH
216005_at	TNC	1557137_at	TMEM17	1554742_at	PMS1	1556183_at	ANKRD36BP2	202779_s_at	UBE2S	204820_s_at	204820_s_at	1561754_at	1561754_at	1555878_at	RPS24	1556328_at	1556328_at	1560318_at	ARHGAP29
216035_x_at	TCF7L2	1557164_a_at	1557164_a_at	1554743_x_at	PMS1	1556187_at	ZNF555	202920_at	ANK2	204823_at	NAV3	1562289_at	1562289_at	1555916_at	RPUSD3	1556329_a_at	1556329_a_at	1560512_at	1560512_at
216511_s_at	TCF7L2	1557167_at	HCG11	1554769_at	ZNF785	1556195_a_at	1556195_a_at	202921_s_at	ANK2	204932_at	TNFRSF11B	1562389_at	1562389_at	1555942_a_at	MIR205HG	1556331_a_at	1556331_a_at	1561226_at	XCR1
217890_s_at	PARVA	1557195_at	1557195_at	1554770_x_at	ZNF785	1556257_at	LOC645513	203639_s_at	FGFR2	204933_s_at	TNFRSF11B	1564413_at	LOC100996702	1555977_at	MYL12A	1556361_s_at	ANKRD13C	1561396_at	EPHA6
219574_at	MARCH1	1557289_s_at	1557289_s_at	1554771_at	1554771_at	1556277_a_at	PAPD4	203698_s_at	FRZB	205016_at	TGFA	1564838_a_at	LOC151760	1555978_s_at	MYL12A	1556579_s_at	1556579_s_at	1562639_at	KIF6
219714_s_at	CACNA2D3	1557309_at	DENND1B	1554790_at	ZSCAN20	1556306_at	1556306_at	203883_s_at	RAB11FIP2	205027_s_at	MAP3K8	1564906_at	1564906_at	1556029_s_at	NMNAT2	1556826_s_at	DRAXIN	1562921_at	1562921_at
219763_at	DENND1A	1557315_a_at	1557315_a_at	1554822_at	PHTF2	1556338_at	1556338_at	203884_s_at	RAB11FIP2	205068_s_at	ARHGAP26	1566766_a_at	MACC1	1556263_s_at	PWRN1	1556886_a_at	LAYN	1563467_at	1563467_at
221973_at	221973_at	1557429_s_at	FAM227B	1554910_at	PRKD3	1556339_a_at	1556339_a_at	203934_at	KDR	205152_at	SLC6A1	1567013_at	NFE2L2	1556344_at	LOC150051	1557136_at	ATP13A4	1563497_at	USP25
222455_s_at	PARVA	1557452_at	1557452_at	1554933_at	PSIP1	1556347_at	1556347_at	204214_s_at	RAB32	205278_at	GAD1	1568592_at	TRIM69	1556402_at	1556402_at	1558077_s_at	MDH1B	1563900_at	FAM83B
225016_at	APCDD1	1557630_s_at	1557630_s_at	1555074_a_at	KCNH5	1556373_a_at	1556373_a_at	204776_at	THBS4	205336_at	PVALB	1568611_at	1568611_at	1556638_at	PAX7	1558105_a_at	1558105_a_at	1564063_a_at	ATP11B
225767_at	225767_at	1557667_at	1557667_at	1555372_at	BCL2L11	1556414_at	LINC00515	204814_at	CADPS	205381_at	LRRC17	1569256_a_at	FAM43B	1556687_a_at	CLDN10	1558451_at	LOC285500	1568597_at	LOC646762
226113_at	ZNF436	1557813_at	1557813_at	1555460_a_at	SLC39A6	1556416_s_at	1556416_s_at	204951_at	RHOH	205478_at	PPP1R1A	1569476_at	DKFZP434L187	1557070_at	TFAP2A-AS1	1558501_at	DNM3	1568777_at	EML5
226114_at	ZNF436	1557814_a_at	1557814_a_at	1555520_at	PTCH1	1556425_a_at	LOC284219	205282_at	LRP8	205479_s_at	PLAU	1569796_s_at	ATRNL1	1557078_at	SLFN5	1558511_s_at	ESYT2	1569850_at	LPHN2
226264_at	SUSD1	1557852_at	1557852_at	1555568_at	GUSBP2	1556488_s_at	MAATS1	205361_s_at	PFDN4	205483_s_at	ISG15	1569872_a_at	LMF1	1557122_s_at	GABRB2	1558527_at	PAXIP1-AS2	1570261_at	1570261_at
226492_at	SEMA6D	1557945_at	TCTE3	1555848_at	1555848_at	1556513_at	ZNF573	205547_s_at	TAGLN	205591_at	OLFM1	1570253_a_at	RHEBL1	1557128_at	FAM111B	1558529_s_at	1558529_s_at	200742_s_at	TPP1
226987_at	RBM15B	1558233_s_at	ATF1	1555858_at	SETD5-AS1	1556597_a_at	LOC284513	205572_at	ANGPT2	205628_at	PRIM2	200642_at	SOD1	1557129_a_at	FAM111B	1558577_at	LOC148709	201581_at	TMX4
227020_at	YPEL2	1558387_at	UG0898H09	1555860_x_at	SETD5-AS1	1556672_a_at	RBM6	205712_at	PTPRD	205700_at	HSD17B6	200650_s_at	LDHA	1557133_at	LINC00632	1558668_s_at	SPATA22	201645_at	TNC
227195_at	ZNF503	1558476_at	BEND5	1555883_s_at	SPIN3	1556690_s_at	1556690_s_at	206038_s_at	NR2C2	205728_at	TENM1	200738_s_at	PGK1	1557181_s_at	C11orf87	1558703_at	SLC46A1	201650_at	KRT19
227261_at	KLF12	1558600_a_at	1558600_a_at	1555890_at	1555890_at	1556695_a_at	NR2F1-AS1	206163_at	MAB21L1	205738_s_at	FABP3	200822_x_at	TPI1	1557292_a_at	MCOLN3	1558722_at	ZNF252P	201744_s_at	LUM
227506_at	SLC16A9	1558626_at	1558626_at	1555913_at	GON4L	1556736_at	LOC100129858	206326_at	GRP	205825_at	PCSK1	200894_s_at	FKBP4	1557918_s_at	SLC16A1	1558819_at	1558819_at	201764_at	TMEM106C
227697_at	SOCS3	1558754_at	ZNF763	1556019_at	GPR180	1556911_at	1556911_at	206349_at	LGI1	205931_s_at	205931_s_at	200966_x_at	ALDOA	1558080_s_at	DNAJC3	1559355_at	NXPH2	201795_at	LBR
228173_at	GNAS	1558755_x_at	ZNF763	1556039_s_at	GPR173	1557044_at	LINC00665	206372_at	MYF6	205948_at	PTPRT	201005_at	CD9	1558217_at	SLFN13	1559425_at	1559425_at	201874_at	MPZL1
228762_at	LFNG	1558816_at	ZNF664	1556043_a_at	TTN-AS1	1557066_at	LUC7L	206462_s_at	NTRK3	206002_at	GPR64	201037_at	PFKP	1558371_a_at	1558371_a_at	1560285_at	1560285_at	201929_s_at	PKP4
228821_at	ST6GAL2	1558906_a_at	OSER1-AS1	1556053_at	DNAJC7	1557081_at	RBM25	206501_x_at	ETV1	206089_at	NELL1	201105_at	LGALS1	1558414_at	FRRS1L	1560286_s_at	1560286_s_at	202083_s_at	SEC14L1
229060_at	YPEL2	1558934_a_at	GTF2H5	1556054_at	1556054_at	1557193_at	1557193_at	206698_at	XK	206245_s_at	IVNS1ABP	201136_at	PLP2	1559361_at	MACC1	1560433_at	1560433_at	202431_s_at	MYC
229092_at	NR2F2	1559026_at	PPP1R26-AS1	1556062_at	RPP30	1557238_s_at	1557238_s_at	206852_at	EPHA7	206280_at	CDH18	201146_at	NFE2L2	1559517_a_at	SPIRE1	1560960_at	1560960_at	202449_s_at	RXRA
229323_at	LINC00959	1559067_a_at	LOC158402	1556069_s_at	HIF3A	1557260_a_at	ZNF382	206879_s_at	NRG2	206281_at	ADCYAP1	201161_s_at	YBX3	1559942_at	MDFIC	1562099_at	1562099_at	202459_s_at	LPIN2
229511_at	SMARCE1	1559102_at	1559102_at	1556086_at	C4orf27	1557267_s_at	GEN1	206924_at	IL11	206376_at	SLC6A15	201231_s_at	ENO1	1560503_a_at	TFAP2A-AS1	1562590_at	PRTG	202460_s_at	LPIN2
229944_at	OPRK1	1559283_a_at	CNPY1	1556088_at	RPAIN	1557283_a_at	ZNF519	206940_s_at	POU4F1	206382_s_at	BDNF	201250_s_at	SLC2A1	1560792_at	1560792_at	1563187_at	1563187_at	202484_s_at	MBD2
230040_at	ADAMTS18	1559332_at	1559332_at	1556103_at	1556103_at	1557438_at	1557438_at	207084_at	POU3F2	206481_s_at	LDB2	201251_at	PKM	1561331_at	ERVMER61-1	1563357_at	1563357_at	202489_s_at	FXYD3
230301_at	230301_at	1559532_at	ARIH2OS	1556180_at	LINC00847	1557504_at	1557504_at	207279_s_at	NEBL	206669_at	GAD1	201263_at	TARS	1561367_a_at	LINC00540	1565602_at	1565602_at	202643_s_at	TNFAIP3
232083_at	KIF16B	1559964_at	FLJ38717	1556216_s_at	1556216_s_at	1557507_at	TRIM52-AS1	207729_at	CDH9	206670_s_at	GAD1	201266_at	TXNRD1	1562056_at	1562056_at	1566163_at	1566163_at	202644_s_at	TNFAIP3
232297_at	KLHL5	1560133_at	GIGYF2	1556226_at	1556226_at	1557805_at	1557805_at	208225_at	FGFR2	207109_at	POU2F3	201340_s_at	ENC1	1562403_a_at	SLC8A3	1568574_x_at	SPP1	202668_at	EFNB2
232701_at	232701_at	1560145_at	MKLN1	1556236_at	1556236_at	1558103_a_at	1558103_a_at	208228_s_at	FGFR2	207194_s_at	ICAM4	201341_at	ENC1	1563494_at	1563494_at	1568612_at	GABRG2	202669_s_at	EFNB2
232882_at	232882_at	1560525_at	1560525_at	1556322_a_at	1556322_a_at	1558115_at	RECK	208297_s_at	EVI5	207265_s_at	KDELR3	201381_x_at	CACYBP	1563947_a_at	ERC1	1568629_s_at	PIK3R2	202695_s_at	STK17A
233772_at	POU6F2-AS2	1560652_at	1560652_at	1556336_at	1556336_at	1558116_x_at	RECK	208427_s_at	ELAVL2	207379_at	EDIL3	201422_at	IFI30	1566603_s_at	RPUSD3	1569469_a_at	LHX8	202718_at	IGFBP2
235102_x_at	235102_x_at	1560763_at	1560763_at	1556364_at	ADAMTS9-AS2	1558143_a_at	BCL2L11	208479_at	KCNA1	207401_at	PROX1	201464_x_at	JUN	1566764_at	MACC1	1570153_at	CCDC169	202743_at	PIK3R3
235278_at	MACROD2	1561433_at	MED15P9	1556378_a_at	LOC440896	1558163_at	PEX13	208791_at	CLU	207424_at	MYF5	201465_s_at	JUN	1568804_at	EIF2AK3	1570523_s_at	ATG10	202768_at	FOSB
236016_at	SMARCE1	1561597_x_at	1561597_x_at	1556451_at	1556451_at	1558170_at	1558170_at	208792_s_at	CLU	207453_s_at	DNAJB5	201487_at	CTSC	1568838_at	WASIR2	200611_s_at	WDR1	202819_s_at	TCEB3
236163_at	LIX1	1561690_at	1561690_at	1556462_a_at	1556462_a_at	1558208_at	TARDBP	208958_at	ERP44	207543_s_at	P4HA1	201519_at	TOMM70A	1568924_a_at	IQUB	200647_x_at	200647_x_at	202889_x_at	MAP7
236396_at	236396_at	1561969_at	ZPLD1	1556487_a_at	MAATS1	1558250_s_at	1558250_s_at	208986_at	TCF12	207679_at	PAX3	201543_s_at	SAR1A	1569003_at	VMP1	200655_s_at	200655_s_at	202890_at	MAP7
236769_at	LOC158402	1561973_at	SMARCC2	1556516_at	LOC100506331	1558348_at	1558348_at	209946_at	VEGFC	207680_x_at	PAX3	201614_s_at	RUVBL1	1569335_a_at	STRA6	200771_at	LAMC1	202910_s_at	CD97
236835_at	FUT8-AS1	1562169_at	1562169_at	1556543_at	1556543_at	1558369_at	MPHOSPH9	210037_s_at	NOS2	208086_s_at	DMD	201761_at	MTHFD2	1569338_at	1569338_at	200791_s_at	IQGAP1	202950_at	CRYZ
237006_at	237006_at	1562775_at	NUDT12	1556551_s_at	SLC39A6	1558467_a_at	UGGT2	210233_at	IL1RAP	208447_s_at	PRPS1	201819_at	SCARB1	1569339_s_at	1569339_s_at	200795_at	SPARCL1	202965_s_at	CAPN6
238311_at	238311_at	1562955_at	1562955_at	1556568_a_at	1556568_a_at	1558515_at	FTX	210664_s_at	TFPI	208478_s_at	BAX	201848_s_at	BNIP3	1569362_at	ALCAM	200798_x_at	MCL1	203185_at	RASSF2
238853_at	RAB3IP	1563217_at	1563217_at	1556656_at	1556656_at	1558620_at	ZNF621	210665_at	TFPI	208500_x_at	FOXD3	201849_at	BNIP3	1569886_a_at	GLB1L3	200878_at	EPAS1	203315_at	NCK2
239209_at	239209_at	1563259_at	1563259_at	1556685_at	1556685_at	1558692_at	C1orf85	211057_at	ROR1	208891_at	DUSP6	201860_s_at	PLAT	1570125_at	1570125_at	200987_x_at	PSME3	203438_at	STC2
240467_at	240467_at	1563502_at	ZDHHC2	1556694_a_at	1556694_a_at	1558710_at	1558710_at	211081_s_at	MAP4K5	208892_s_at	DUSP6	201926_s_at	CD55	200067_x_at	SNX3	201012_at	ANXA1	203498_at	RCAN2
240927_at	240927_at	1563899_at	LCTL	1556735_at	1556735_at	1558714_at	1558714_at	211148_s_at	ANGPT2	208893_s_at	DUSP6	201954_at	ARPC1B	200606_at	DSP	201036_s_at	HADH	203642_s_at	COBLL1
241321_at	241321_at	1564164_at	DENND1B	1556743_at	1556743_at	1558719_s_at	RPAIN	211341_at	POU4F1	208894_at	HLA-DRA	201968_s_at	PGM1	200621_at	CSRP1	201041_s_at	DUSP1	203689_s_at	FMR1
241739_at	OGFOD1	1564231_at	IFT80	1556849_at	1556849_at	1558739_at	1558739_at	211401_s_at	FGFR2	209465_x_at	PTN	201984_s_at	EGFR	200628_s_at	WARS	201060_x_at	STOM	203708_at	PDE4B
241883_x_at	241883_x_at	1564746_at	SLC9B2	1556964_s_at	1556964_s_at	1558759_s_at	CLASP2	212667_at	SPARC	209466_x_at	PTN	202070_s_at	IDH3A	200629_at	WARS	201061_s_at	STOM	203767_s_at	STS
242053_at	242053_at	1565706_at	1565706_at	1556989_at	1556989_at	1558777_at	MKL2	212792_at	DPY19L1	209501_at	CDR2	202096_s_at	TSPO	200653_s_at	200653_s_at	201069_at	MMP2	203913_s_at	HPGD
242172_at	242172_at	1565809_x_at	1565809_x_at	1557012_a_at	1557012_a_at	1558778_s_at	MKL2	212909_at	LYPD1	209676_at	TFPI	202132_at	WWTR1	200660_at	S100A11	201079_at	SYNGR2	203914_x_at	HPGD
242975_s_at	242975_s_at	1566897_at	1566897_at	1557059_at	LOC254128	1558783_at	1558783_at	213106_at	ATP8A1	209846_s_at	BTN3A2	202133_at	WWTR1	200690_at	HSPA9	201087_at	PXN	203987_at	FZD6
243283_at	CROT	1567045_at	1567045_at	1557065_at	YLPM1	1558807_at	ATAD2B	213267_at	DOPEY1	210015_s_at	MAP2	202201_at	BLVRB	200691_s_at	HSPA9	201130_s_at	CDH1	204069_at	MEIS1
243907_at	243907_at	1567213_at	PNN	1557105_a_at	ZSCAN30	1558842_at	1558842_at	213271_s_at	DOPEY1	210033_s_at	SPAG6	202284_s_at	CDKN1A	200692_s_at	HSPA9	201141_at	GPNMB	204187_at	GMPR
244181_at	244181_at	1568803_at	1568803_at	1557118_a_at	INTS6-AS1	1558922_at	1558922_at	213293_s_at	TRIM22	210139_s_at	PMP22	202310_s_at	COL1A1	200696_s_at	GSN	201171_at	ATP6V0E1	204324_s_at	GOLIM4
244802_at	244802_at	1568815_a_at	DDX50	1557121_s_at	1557121_s_at	1559038_at	SEPT2	213510_x_at	USP32P2	210166_at	TLR5	202345_s_at	FABP5	200697_at	HK1	201192_s_at	PITPNA	204333_s_at	AGA
244835_at	C16orf52	1568857_a_at	NBR1	1557145_at	STK38	1559044_at	EXOSC1	213880_at	LGR5	210198_s_at	PLP1	202364_at	MXI1	200698_at	KDELR2	201200_at	CREG1	204393_s_at	ACPP
55872_at	ZNF512B	1568868_at	CYP27C1	1557147_a_at	1557147_a_at	1559161_at	1559161_at	214460_at	LSAMP	210221_at	CHRNA3	202375_at	SEC24D	200700_s_at	KDELR2	201289_at	CYR61	204404_at	SLC12A2
		1569243_at	1569243_at	1557166_at	PDCD4	1559232_a_at	1559232_a_at	214537_at	HIST1H1D	210519_s_at	NQO1	202403_s_at	COL1A2	200704_at	LITAF	201301_s_at	ANXA4	204439_at	IFI44L
		1569785_at	1569785_at	1557169_x_at	HCG11	1559259_at	1559259_at	214624_at	UPK1A	210601_at	CDH6	202404_s_at	COL1A2	200709_at	FKBP1A	201302_at	ANXA4	204607_at	HMGCS2
		1569930_at	1569930_at	1557196_a_at	1557196_a_at	1559292_s_at	LINC00032	214785_at	VPS13A	210753_s_at	EPHB1	202422_s_at	ACSL4	200782_at	ANXA5	201323_at	EBNA1BP2	204637_at	CGA
		1570001_at	CASP8AP2	1557239_at	BBX	1559500_at	VPS8	214978_s_at	PPFIA4	210982_s_at	HLA-DRA	202454_s_at	ERBB3	200824_at	GSTP1	201334_s_at	ARHGEF12	204713_s_at	F5
		1570048_at	DNAJC24	1557240_a_at	1557240_a_at	1559528_at	LOC100129917	215447_at	215447_at	211227_s_at	211227_s_at	202481_at	DHRS3	200831_s_at	SCD	201338_x_at	GTF3A	204714_s_at	F5
		1570173_at	INTS7	1557257_at	BCL10	1559544_s_at	LINC00441	215469_at	215469_at	211479_s_at	HTR2C	202493_x_at	CSH1	200862_at	DHCR24	201349_at	SLC9A3R1	204718_at	EPHB6
		200049_at	KAT7	1557270_at	1557270_at	1560031_at	FRMD4A	215635_at	215635_at	211668_s_at	PLAU	202498_s_at	SLC2A3	200872_at	S100A10	201368_at	ZFP36L2	204748_at	PTGS2
		200740_s_at	SUMO3	1557300_s_at	1557300_s_at	1560112_at	WDFY2	216069_at	PRMT2	211737_x_at	PTN	202499_s_at	SLC2A3	200911_s_at	TACC1	201369_s_at	ZFP36L2	204844_at	ENPEP
		200813_s_at	PAFAH1B1	1557325_at	1557325_at	1560199_x_at	1560199_x_at	216086_at	SV2C	211756_at	PTHLH	202528_at	GALE	200916_at	TAGLN2	201403_s_at	MGST3	204845_s_at	ENPEP
		200816_s_at	PAFAH1B1	1557363_a_at	PHIP	1560271_at	1560271_at	216466_at	NAV3	211833_s_at	BAX	202545_at	PRKCD	200967_at	PPIB	201412_at	LRP10	204897_at	PTGER4
		200896_x_at	HDGF	1557383_a_at	1557383_a_at	1560346_at	1560346_at	216555_at	PRR14L	211898_s_at	EPHB1	202625_at	LYN	200968_s_at	PPIB	201420_s_at	WDR77	204942_s_at	ALDH3B2
		200919_at	PHC2	1557384_at	1557384_at	1560386_at	1560386_at	216598_s_at	CCL2	212107_s_at	DHX9	202626_s_at	LYN	200979_at	PDHA1	201534_s_at	UBL3	205043_at	CFTR
		201056_at	GOLGB1	1557394_at	DLGAP4	1560622_at	1560622_at	217053_x_at	ETV1	212785_s_at	LARP7	202680_at	GTF2E2	200982_s_at	ANXA6	201535_at	UBL3	205044_at	GABRP
		201321_s_at	SMARCC2	1557402_at	1557402_at	1560738_at	1560738_at	217486_s_at	ZDHHC17	212850_s_at	LRP4	202733_at	P4HA2	201021_s_at	DSTN	201554_x_at	GYG1	205098_at	CCR1
		201350_at	FLOT2	1557432_at	RASAL2	1560739_a_at	1560739_a_at	217585_at	NEBL	213131_at	OLFM1	202794_at	INPP1	201028_s_at	CD99	201559_s_at	CLIC4	205226_at	PDGFRL
		201394_s_at	RBM5	1557433_at	1557433_at	1560741_at	1560741_at	217620_s_at	PIK3CB	213258_at	TFPI	202800_at	SLC1A3	201029_s_at	CD99	201693_s_at	EGR1	205279_s_at	GLRB
		201395_at	RBM5	1557459_at	1557459_at	1560775_at	1560775_at	218986_s_at	DDX60	213546_at	DKFZP586I1420	202855_s_at	SLC16A3	201035_s_at	HADH	201694_s_at	EGR1	205280_at	GLRB
		201418_s_at	SOX4	1557616_at	ZNF496	1560853_x_at	ZNF826P	219308_s_at	AK5	213847_at	PRPH	202856_s_at	SLC16A3	201047_x_at	RAB6A	201716_at	SNX1	205289_at	BMP2
		201715_s_at	ACIN1	1557659_a_at	1557659_a_at	1561101_at	JAKMIP2-AS1	219779_at	ZFHX4	213982_s_at	RABGAP1L	202935_s_at	SOX9	201116_s_at	CPE	201739_at	SGK1	205290_s_at	BMP2
		201825_s_at	SCCPDH	1557707_at	1557707_at	1561149_at	1561149_at	220226_at	TRPM8	214022_s_at	IFITM1	202947_s_at	GYPC	201117_s_at	CPE	201850_at	CAPG	205311_at	DDC
		201826_s_at	SCCPDH	1557718_at	PPP2R5C	1561155_at	1561155_at	220317_at	LRAT	214240_at	GAL	202990_at	PYGL	201122_x_at	EIF5A	201853_s_at	CDC25B	205466_s_at	HS3ST1
		201869_s_at	TBL1X	1557737_s_at	NKTR	1561361_at	ZNF660	220346_at	MTHFD2L	214285_at	FABP3	203000_at	STMN2	201123_s_at	EIF5A	201862_s_at	LRRFIP1	205472_s_at	DACH1
		201932_at	LRRC41	1557738_at	1557738_at	1561687_a_at	ZNF382	220382_s_at	ARHGAP28	214596_at	CHRM3	203001_s_at	STMN2	201131_s_at	CDH1	201883_s_at	B4GALT1	205487_s_at	VGLL1
		201975_at	CLIP1	1557780_at	1557780_at	1561760_s_at	LOC645513	220575_at	FAM106A	214597_at	SSTR2	203020_at	RABGAP1L	201140_s_at	RAB5C	201893_x_at	DCN	205533_s_at	CDH6
		202116_at	DPF2	1557797_a_at	1557797_a_at	1561895_at	1561895_at	220666_at	220666_at	214693_x_at	214693_x_at	203023_at	NOP16	201151_s_at	MBNL1	201904_s_at	CTDSPL	205569_at	LAMP3
		202137_s_at	ZMYND11	1557804_at	1557804_at	1561906_at	1561906_at	220717_at	ADAMTS20	214844_s_at	DOK5	203186_s_at	S100A4	201152_s_at	MBNL1	201905_s_at	CTDSPL	205612_at	MMRN1
		202160_at	CREBBP	1557809_a_at	1557809_a_at	1562110_at	1562110_at	221765_at	UGCG	215209_at	SEC24D	203192_at	ABCB6	201153_s_at	MBNL1	201906_s_at	CTDSPL	205630_at	CRH
		202215_s_at	NFYC	1557828_a_at	C5orf28	1562275_at	1562275_at	221766_s_at	FAM46A	215241_at	ANO3	203201_at	PMM2	201156_s_at	RAB5C	202005_at	ST14	205648_at	WNT2
		202219_at	SLC6A8	1557889_at	1557889_at	1562412_at	1562412_at	221910_at	ETV1	215342_s_at	RABGAP1L	203344_s_at	RBBP8	201163_s_at	IGFBP7	202023_at	EFNA1	205768_s_at	SLC27A2
		202262_x_at	DDAH2	1557953_at	ZKSCAN1	1562481_at	PCBP1-AS1	221911_at	ETV1	215380_s_at	GGCT	203349_s_at	ETV5	201170_s_at	BHLHE40	202108_at	PEPD	205769_at	SLC27A2
		202283_at	SERPINF1	1558002_at	STRAP	1562497_at	1562497_at	221985_at	KLHL24	215933_s_at	HHEX	203542_s_at	KLF9	201189_s_at	ITPR3	202124_s_at	TRAK2	205848_at	GAS2
		202326_at	EHMT2	1558097_at	1558097_at	1562644_at	MTHFD2L	221986_s_at	KLHL24	216059_at	PAX3	203543_s_at	KLF9	201195_s_at	SLC7A5	202149_at	NEDD9	206104_at	ISL1
		202349_at	TOR1A	1558102_at	1558102_at	1562701_at	1562701_at	222043_at	CLU	216565_x_at	216565_x_at	203580_s_at	SLC7A6	201218_at	CTBP2	202191_s_at	GAS7	206337_at	CCR7
		202458_at	PRSS23	1558142_at	TNRC6B	1562848_at	IST1	222171_s_at	PKNOX2	216867_s_at	PDGFA	203596_s_at	IFIT5	201272_at	AKR1B1	202192_s_at	GAS7	206373_at	ZIC1
		202553_s_at	SYF2	1558164_s_at	PEX13	1562953_s_at	WDFY3-AS2	222549_at	CLDN1	216963_s_at	GAP43	203665_at	HMOX1	201288_at	ARHGDIB	202236_s_at	SLC16A1	206433_s_at	SPOCK3
		202555_s_at	MYLK	1558293_at	KIAA1107	1563080_at	1563080_at	222862_s_at	AK5	217049_x_at	217049_x_at	203666_at	CXCL12	201300_s_at	PRNP	202282_at	HSD17B10	206434_at	SPOCK3
		202616_s_at	MECP2	1558388_a_at	UG0898H09	1563130_a_at	1563130_a_at	222871_at	KLHDC8A	217356_s_at	PGK1	203725_at	GADD45A	201331_s_at	STAT6	202340_x_at	NR4A1	206458_s_at	WNT2B
		202617_s_at	MECP2	1558418_at	1558418_at	1563614_at	MTBP	222880_at	AKT3	217599_s_at	MDFIC	203786_s_at	TPD52L1	201348_at	GPX3	202377_at	LEPROT	206595_at	CST6
		202708_s_at	HIST2H2BE	1558474_at	1558474_at	1564190_x_at	ZNF519	222942_s_at	222942_s_at	217767_at	C3	203799_at	203799_at	201387_s_at	UCHL1	202409_at	202409_at	206732_at	SLITRK3
		202769_at	CCNG2	1558486_at	ZNF493	1564378_a_at	1564378_a_at	223550_s_at	CA10	218273_s_at	PDP1	203800_s_at	MRPS14	201421_s_at	WDR77	202410_x_at	202410_x_at	206935_at	PCDH8
		202770_s_at	CCNG2	1558560_s_at	BLZF1	1565436_s_at	KMT2A	223843_at	SCARA3	218543_s_at	PARP12	203807_x_at	CSH2	201427_s_at	SEPP1	202421_at	IGSF3	206942_s_at	PMCH
		202925_s_at	PLAGL2	1558695_at	1558695_at	1565620_at	AGAP4	223888_s_at	LARS	218625_at	NRN1	203814_s_at	NQO2	201428_at	CLDN4	202425_x_at	PPP3CA	206950_at	SCN9A
		202980_s_at	SIAH1	1558700_s_at	ZNF260	1565689_at	1565689_at	224184_s_at	BOC	218995_s_at	EDN1	203827_at	WIPI1	201438_at	COL6A3	202427_s_at	MPC2	207054_at	IMPG1
		202981_x_at	SIAH1	1558748_at	1558748_at	1565716_at	FUS	224801_at	NDFIP2	219093_at	PID1	203849_s_at	KIF1A	201463_s_at	TALDO1	202429_s_at	PPP3CA	207102_at	AKR1D1
		203015_s_at	SSX2IP	1558802_at	1558802_at	1566191_at	SUZ12	224973_at	FAM46A	219106_s_at	KLHL41	203857_s_at	PDIA5	201466_s_at	JUN	202430_s_at	PLSCR1	207119_at	PRKG1
		203016_s_at	SSX2IP	1558822_at	1558822_at	1566257_at	GPR180	225502_at	DOCK8	219117_s_at	FKBP11	204017_at	KDELR3	201473_at	JUNB	202447_at	DECR1	207147_at	DLX2
		203017_s_at	SSX2IP	1558854_a_at	1558854_a_at	1566597_at	1566597_at	225990_at	BOC	219118_at	FKBP11	204115_at	GNG11	201489_at	PPIF	202457_s_at	PPP3CA	207156_at	207156_at
		203018_s_at	SSX2IP	1558924_s_at	CLIP1	1566783_at	1566783_at	226016_at	CD47	219181_at	LIPG	204137_at	GPR137B	201490_s_at	PPIF	202506_at	SSFA2	207393_at	HCRTR2
		203019_x_at	SSX2IP	1558937_s_at	1558937_s_at	1567214_a_at	PNN	226040_at	226040_at	219525_at	SLC47A1	204168_at	MGST2	201510_at	ELF3	202511_s_at	ATG5	207414_s_at	207414_s_at
		203046_s_at	TIMELESS	1559039_at	DHX36	1568609_s_at	1568609_s_at	226189_at	ITGB8	219660_s_at	ATP8A2	204197_s_at	RUNX3	201516_at	SRM	202525_at	PRSS8	207540_s_at	SYK
		203069_at	SV2A	1559103_s_at	1559103_s_at	1568702_a_at	PAAF1	226258_at	226258_at	219668_at	GDAP1L1	204198_s_at	RUNX3	201531_at	ZFP36	202551_s_at	CRIM1	207761_s_at	METTL7A
		203076_s_at	SMAD2	1559128_at	HSDL2	1568763_s_at	1568763_s_at	226420_at	MECOM	219844_at	C10orf118	204205_at	APOBEC3G	201537_s_at	DUSP3	202552_s_at	CRIM1	207767_s_at	EGR4
		203077_s_at	SMAD2	1559149_at	1559149_at	1568866_at	1568866_at	226690_at	ADCYAP1R1	219888_at	SPAG4	204223_at	PRELP	201577_at	NME1	202593_s_at	GDE1	207768_at	EGR4
		203080_s_at	BAZ2B	1559156_at	1559156_at	1568983_a_at	1568983_a_at	226695_at	PRRX1	220361_at	IQCH	204284_at	PPP1R3C	201590_x_at	ANXA2	202596_at	ENSA	207802_at	CRISP3
		203155_at	SETDB1	1559214_at	1559214_at	1569041_at	1569041_at	226834_at	226834_at	220675_s_at	PNPLA3	204285_s_at	PMAIP1	201596_x_at	KRT18	202599_s_at	NRIP1	207904_s_at	LNPEP
		203269_at	NSMAF	1559360_at	1559360_at	1569106_s_at	SETD5	226885_at	RNF217	220786_s_at	SLC38A4	204286_s_at	PMAIP1	201599_at	OAT	202660_at	ITPR2	207978_s_at	NR4A3
		203369_x_at	PDLIM7	1559391_s_at	1559391_s_at	1569129_s_at	C3orf38	227347_x_at	HES4	220942_x_at	FAM162A	204319_s_at	RGS10	201648_at	JAK1	202662_s_at	ITPR2	207991_x_at	ACRV1
		203384_s_at	GOLGA1	1559401_a_at	1559401_a_at	1569240_at	ZNF93	227415_at	LOC283508	221011_s_at	LBH	204328_at	TMC6	201662_s_at	ACSL3	202693_s_at	STK17A	208189_s_at	MYO7A
		203413_at	NELL2	1559410_at	1559410_at	1569241_a_at	ZNF93	227740_at	UHMK1	221605_s_at	PIPOX	204331_s_at	MRPS12	201692_at	SIGMAR1	202694_at	STK17A	208399_s_at	EDN3
		203485_at	RTN1	1559449_a_at	1559449_a_at	1569251_a_at	ZNF333	227929_at	LIN7A	222073_at	COL4A3	204348_s_at	204348_s_at	201695_s_at	PNP	202742_s_at	PRKACB	208782_at	FSTL1
		203557_s_at	PCBD1	1559455_at	1559455_at	1569290_s_at	GRIA3	228186_s_at	RSPO3	222696_at	AXIN2	204379_s_at	FGFR3	201718_s_at	EPB41L2	202820_at	AHR	208885_at	LCP1
		203620_s_at	FCHSD2	1559479_at	LOC285540	1569311_at	1569311_at	228260_at	ELAVL2	222802_at	EDN1	204394_at	SLC43A1	201768_s_at	CLINT1	202826_at	SPINT1	208937_s_at	ID1
		203845_at	KAT2B	1559490_at	LRCH3	1569312_at	1569312_at	228546_at	DPP6	223710_at	CCL26	204463_s_at	EDNRA	201769_at	CLINT1	202912_at	ADM	209000_s_at	SEPT8
		203868_s_at	VCAM1	1559496_at	PPA2	1569315_s_at	LINC00894	228640_at	PCDH7	223722_at	DNAJC12	204464_s_at	EDNRA	201797_s_at	VARS	202948_at	IL1R1	209016_s_at	KRT7
		203903_s_at	HEPH	1559510_at	LINC00630	1569527_at	1569527_at	228749_at	ZDBF2	223761_at	FGF19	204502_at	SAMHD1	201798_s_at	MYOF	202974_at	MPP1	209082_s_at	COL18A1
		204029_at	CELSR2	1559523_at	1559523_at	1569666_s_at	1569666_s_at	229288_at	EPHA7	224165_s_at	IQCH	204554_at	PPP1R3D	201818_at	LPCAT1	203006_at	INPP5A	209091_s_at	SH3GLB1
		204041_at	MAOB	1559524_at	1559524_at	1570103_at	1570103_at	229313_at	ANO5	224441_s_at	USP45	204560_at	FKBP5	201839_s_at	EPCAM	203041_s_at	LAMP2	209101_at	CTGF
		204042_at	WASF3	1559529_at	PTK2	1570143_at	1570143_at	229497_at	ANKDD1A	224559_at	MALAT1	204584_at	L1CAM	201842_s_at	EFEMP1	203042_at	LAMP2	209105_at	NCOA1
		204047_s_at	PHACTR2	1559534_at	LOC100996419	1570450_at	1570450_at	229546_at	229546_at	224568_x_at	MALAT1	204595_s_at	STC1	201843_s_at	EFEMP1	203065_s_at	CAV1	209106_at	NCOA1
		204048_s_at	PHACTR2	1559535_s_at	LOC100996419	1570571_at	CCDC91	229651_at	SEZ6	224888_at	EPT1	204596_s_at	STC1	201844_s_at	RYBP	203116_s_at	FECH	209123_at	QDPR
		204049_s_at	PHACTR2	1559589_a_at	1559589_a_at	200685_at	SRSF11	229673_at	GPATCH2L	225241_at	CCDC80	204597_x_at	STC1	201845_s_at	RYBP	203126_at	IMPA2	209227_at	TUSC3
		204076_at	ENTPD4	1559672_a_at	CCDC171	200904_at	HLA-E	229927_at	LEMD1	225242_s_at	CCDC80	204653_at	TFAP2A	201846_s_at	RYBP	203139_at	DAPK1	209231_s_at	DCTN5
		204082_at	PBX3	1559691_at	1559691_at	200923_at	LGALS3BP	230035_at	BOC	225283_at	ARRDC4	204678_s_at	KCNK1	201847_at	LIPA	203142_s_at	AP3B1	209286_at	CDC42EP3
		204085_s_at	CLN5	1559723_s_at	1559723_s_at	200962_at	RPL31	230237_at	ADCYAP1	225540_at	MAP2	204679_at	KCNK1	201865_x_at	NR3C1	203147_s_at	TRIM14	209447_at	SYNE1
		204105_s_at	NRCAM	1559763_at	ZC3H12C	201212_at	LGMN	230680_at	SLITRK4	225562_at	RASA3	204697_s_at	CHGA	201939_at	PLK2	203184_at	FBN2	209454_s_at	TEAD3
		204121_at	GADD45G	1559856_s_at	KMT2A	201294_s_at	WSB1	230844_at	LOC440934	225664_at	COL12A1	204735_at	PDE4A	201951_at	ALCAM	203218_at	MAPK9	209514_s_at	RAB27A
		204148_s_at	204148_s_at	1559979_at	SYF2	201295_s_at	WSB1	230849_at	KCNA1	225667_s_at	FAM84A	204794_at	DUSP2	201952_at	ALCAM	203256_at	CDH3	209603_at	GATA3
		204161_s_at	ENPP4	1560029_a_at	C11orf57	201313_at	ENO2	231142_at	231142_at	225942_at	NLN	204865_at	CA3	201953_at	CIB1	203272_s_at	TUSC2	209610_s_at	SLC1A4
		204201_s_at	PTPN13	1560081_at	RAD51-AS1	201372_s_at	CUL3	231407_s_at	FOXH1	225973_at	TAP2	204879_at	PDPN	201959_s_at	MYCBP2	203333_at	KIFAP3	209615_s_at	PAK1
		204276_at	TK2	1560082_at	1560082_at	201431_s_at	DPYSL3	231484_at	231484_at	226125_at	LOC100288152	204891_s_at	LCK	201960_s_at	MYCBP2	203336_s_at	ITGB1BP1	209679_s_at	SMAGP
		204301_at	KBTBD11	1560153_at	FRAS1	201506_at	TGFBI	231612_at	CABS1	226228_at	AQP4	204917_s_at	MLLT3	201963_at	ACSL1	203372_s_at	SOCS2	209692_at	EYA2
		204321_at	NEO1	1560156_at	1560156_at	201666_at	TIMP1	232100_at	RNF217	226612_at	UBE2QL1	204918_s_at	MLLT3	201980_s_at	RSU1	203373_at	SOCS2	209735_at	ABCG2
		204359_at	204359_at	1560171_at	1560171_at	201707_at	PEX19	232111_at	LINC00617	226855_at	PDP2	204929_s_at	VAMP5	201983_s_at	EGFR	203395_s_at	HES1	209781_s_at	KHDRBS3
		204516_at	ATXN7	1560222_at	1560222_at	201708_s_at	NIPSNAP1	232263_at	SLC6A15	226875_at	DOCK11	204953_at	SNAP91	202003_s_at	ACAA2	203407_at	PPL	209817_at	PPP3CB
		204520_x_at	BRD1	1560227_at	GDPD1	202241_at	TRIB1	232304_at	PELI1	227099_s_at	C11orf96	204955_at	SRPX	202007_at	NID1	203434_s_at	MME	209863_s_at	TP63
		204523_at	ZNF140	1560263_at	1560263_at	202379_s_at	NKTR	232313_at	TMEM132C	227410_at	FAM43A	204956_at	MTAP	202008_s_at	NID1	203481_at	FAM178A	209959_at	NR4A3
		204601_at	N4BP1	1560274_at	WTAP	202380_s_at	NKTR	232386_at	VPS13C	227703_s_at	SYTL4	204962_s_at	204962_s_at	202030_at	BCKDK	203500_at	GCDH	210042_s_at	CTSZ
		204663_at	ME3	1560316_s_at	GLCCI1	202478_at	TRIB2	232835_at	232835_at	227850_x_at	CDC42EP5	204995_at	CDK5R1	202069_s_at	IDH3A	203510_at	MET	210058_at	MAPK13
		204732_s_at	TRIM23	1560342_at	1560342_at	202479_s_at	TRIB2	232843_s_at	DOCK8	228150_at	SEC16B	205003_at	DOCK4	202071_at	SDC4	203563_at	AFAP1	210059_s_at	MAPK13
		204984_at	GPC4	1560404_a_at	DPH6	202541_at	AIMP1	233289_at	233289_at	228194_s_at	SORCS1	205100_at	GFPT2	202081_at	IER2	203566_s_at	AGL	210085_s_at	ANXA9
		205041_s_at	205041_s_at	1560422_at	1560422_at	202558_s_at	HSPA13	233685_at	233685_at	228555_at	CAMK2D	205131_x_at	CLEC11A	202085_at	TJP2	203567_s_at	TRIM38	210239_at	IRX5
		205084_at	BCAP29	1560486_at	STXBP3	202792_s_at	PPP6R2	233876_at	233876_at	228582_x_at	MALAT1	205184_at	GNG4	202087_s_at	CTSL	203570_at	LOXL1	210255_at	RAD51B
		205105_at	MAN2A1	1560558_at	INIP	202843_at	DNAJB9	233914_s_at	SBF2	228653_at	SAMD5	205286_at	TFAP2C	202113_s_at	SNX2	203610_s_at	TRIM38	210340_s_at	CSF2RA
		205108_s_at	APOB	1560654_at	FLJ37201	202876_s_at	PBX2	233950_at	CADPS	228656_at	PROX1	205287_s_at	TFAP2C	202125_s_at	TRAK2	203646_at	FDX1	210524_x_at	210524_x_at
		205109_s_at	ARHGEF4	1560813_at	1560813_at	202982_s_at	202982_s_at	235150_at	SESN3	229228_at	229228_at	205342_s_at	SULT1C2	202165_at	PPP1R2	203647_s_at	FDX1	210612_s_at	SYNJ2
		205206_at	KAL1	1560834_a_at	RMST	203029_s_at	PTPRN2	235183_at	235183_at	229376_at	PROX1	205355_at	ACADSB	202166_s_at	PPP1R2	203658_at	SLC25A20	210836_x_at	PDE4D
		205251_at	PER2	1560859_at	1560859_at	203264_s_at	ARHGEF9	235216_at	ESCO1	229459_at	FAM19A5	205358_at	GRIA2	202187_s_at	PPP2R5A	203671_at	TPMT	211067_s_at	GAS7
		205268_s_at	ADD2	1560906_at	1560906_at	203295_s_at	ATP1A2	235461_at	TET2	229559_at	PPM1N	205428_s_at	CALB2	202194_at	TMED5	203685_at	BCL2	211103_at	MYO7A
		205368_at	FAM131B	1560926_at	1560926_at	203296_s_at	ATP1A2	235484_at	PTAR1	229734_at	MIR4697HG	205429_s_at	MPP6	202195_s_at	TMED5	203741_s_at	ADCY7	211287_x_at	CSF2RA
		205442_at	MFAP3L	1561002_at	1561002_at	203313_s_at	TGIF1	235596_at	235596_at	230220_at	UNC80	205430_at	BMP5	202196_s_at	DKK3	203780_at	MPZL2	211380_s_at	PRKG1
		205501_at	PDE10A	1561143_at	1561143_at	203346_s_at	MTF2	235645_at	ESCO1	230262_at	ST8SIA3	205431_s_at	BMP5	202242_at	TSPAN7	203788_s_at	SEMA3C	211548_s_at	HPGD
		205525_at	CALD1	1561158_at	1561158_at	203476_at	TPBG	235672_at	MAP6	230372_at	HAS2	205433_at	BCHE	202267_at	LAMC2	203812_at	SLIT3	211549_s_at	HPGD
		205541_s_at	GSPT2	1561190_at	CDKL3	203603_s_at	ZEB2	235765_at	TLE4	230425_at	EPHB1	205489_at	CRYM	202286_s_at	TACSTD2	203813_s_at	SLIT3	211712_s_at	ANXA9
		205656_at	PCDH17	1561195_at	1561195_at	203653_s_at	COIL	235845_at	SP5	230464_at	S1PR5	205538_at	CORO2A	202295_s_at	CTSH	203836_s_at	MAP3K5	211778_s_at	OVOL2
		205682_x_at	APOM	1561198_at	LOC100506127	203679_at	TMED1	236123_at	ST7L	230650_at	230650_at	205548_s_at	BTG3	202309_at	MTHFD1	203837_at	MAP3K5	211796_s_at	211796_s_at
		205746_s_at	ADAM17	1561206_at	KLHL8	203729_at	EMP3	236293_at	RHOH	230728_at	FKBP14	205618_at	PRRG1	202362_at	RAP1A	203885_at	RAB21	211840_s_at	PDE4D
		205756_s_at	F8	1561272_at	1561272_at	203797_at	VSNL1	236409_at	236409_at	230900_at	CCDC110	205668_at	LY75	202363_at	SPOCK1	203910_at	ARHGAP29	212083_at	TEX261
		205814_at	GRM3	1561319_at	OTX2-AS1	203798_s_at	VSNL1	236439_at	236439_at	230917_at	230917_at	205741_s_at	DTNA	202402_s_at	CARS	203925_at	GCLM	212093_s_at	MTUS1
		205829_at	HSD17B1	1561341_at	1561341_at	203810_at	DNAJB4	236697_at	236697_at	230920_at	TRABD2B	205751_at	SH3GL2	202435_s_at	CYP1B1	203963_at	CA12	212095_s_at	MTUS1
		205839_s_at	BZRAP1	1561578_s_at	SLC25A53	203912_s_at	DNASE1L1	236915_at	C4orf47	231040_at	231040_at	205773_at	CPEB3	202436_s_at	CYP1B1	203972_s_at	PEX3	212149_at	EFR3A
		205893_at	NLGN1	1561640_at	1561640_at	204014_at	DUSP4	237158_s_at	MPHOSPH9	231490_at	231490_at	205774_at	F12	202437_s_at	CYP1B1	204019_s_at	SH3YL1	212150_at	EFR3A
		205933_at	SETBP1	1561660_at	SLC25A53	204015_s_at	DUSP4	237245_at	237245_at	231666_at	PAX3	205789_at	CD1D	202439_s_at	IDS	204039_at	CEBPA	212325_at	LIMCH1
		206003_at	CEP135	1561763_at	1561763_at	204036_at	LPAR1	237332_at	237332_at	232049_at	SNX2	205809_s_at	WASL	202446_s_at	PLSCR1	204040_at	RNF144A	212327_at	LIMCH1
		206022_at	NDP	1561884_at	CEPT1	204037_at	LPAR1	237515_at	TMEM56	232226_at	LRRC4C	205822_s_at	HMGCS1	202465_at	PCOLCE	204066_s_at	AGAP1	212328_at	LIMCH1
		206136_at	FZD5	1562053_at	1562053_at	204092_s_at	AURKA	237681_at	237681_at	232307_at	232307_at	205857_at	SLC18A2	202497_x_at	SLC2A3	204081_at	NRGN	212335_at	GNS
		206142_at	ZNF135	1562194_at	1562194_at	204291_at	ZNF518A	238356_at	DOCK11	232852_at	232852_at	205858_at	NGFR	202501_at	MAPRE2	204094_s_at	TSC22D2	212359_s_at	ZSWIM8
		206144_at	MAGI1	1562226_at	VWDE	204391_x_at	TRIM24	238426_at	TMEM130	232861_at	PDP2	205885_s_at	ITGA4	202507_s_at	SNAP25	204135_at	FILIP1L	212611_at	DTX4
		206157_at	PTX3	1562229_at	1562229_at	204435_at	NUPL1	238512_at	238512_at	234083_at	234083_at	205891_at	ADORA2B	202508_s_at	SNAP25	204159_at	CDKN2C	212718_at	PAPOLA
		206208_at	CA4	1562235_s_at	1562235_s_at	204469_at	PTPRZ1	238533_at	EPHA7	234088_at	234088_at	205899_at	CCNA1	202519_at	MLXIP	204202_at	IQCE	212761_at	TCF7L2
		206209_s_at	CA4	1562280_at	1562280_at	204496_at	STRN3	238623_at	238623_at	234563_at	234563_at	205942_s_at	ACSM3	202543_s_at	GMFB	204204_at	SLC31A2	212767_at	MTG1
		206237_s_at	NRG1	1562303_at	ZKSCAN3	204512_at	HIVEP1	238684_at	SETDB2	235030_at	NXPE3	205958_x_at	CSHL1	202546_at	VAMP8	204254_s_at	VDR	212780_at	SOS1
		206392_s_at	RARRES1	1562305_x_at	ZKSCAN3	204602_at	DKK1	238852_at	PRRX1	235180_at	STYX	205966_at	TAF13	202554_s_at	GSTM3	204326_x_at	MT1X	212810_s_at	SLC1A4
		206471_s_at	PLXNC1	1562386_s_at	ZNF501	204642_at	S1PR1	239293_at	NRSN1	235205_at	OXR1	205997_at	ADAM28	202575_at	CRABP2	204361_s_at	SKAP2	212828_at	SYNJ2
		206502_s_at	INSM1	1562544_at	1562544_at	204645_at	CCNT2	239351_at	FKBP3	235311_at	FKBP14	206001_at	NPY	202597_at	IRF6	204362_at	SKAP2	212864_at	CDS2
		206588_at	DAZL	1562600_at	1562600_at	204795_at	PRR3	239557_at	239557_at	235339_at	SETDB2	206032_at	DSC3	202600_s_at	NRIP1	204364_s_at	REEP1	212956_at	TBC1D9
		206634_at	SIX3	1562612_at	1562612_at	204831_at	CDK8	239562_at	MTHFD2L	235492_at	RNF217	206082_at	HCP5	202609_at	EPS8	204365_s_at	REEP1	213119_at	SLC36A1
		206706_at	NTF3	1562633_at	RMST	204838_s_at	MLH3	239841_at	239841_at	235850_at	FAM162A	206091_at	MATN3	202619_s_at	PLOD2	204396_s_at	GRK5	213172_at	TTC9
		206762_at	KCNA5	1562777_at	ERV3-1	204948_s_at	FST	239884_at	CADPS	235952_at	235952_at	206149_at	CHP2	202620_s_at	PLOD2	204412_s_at	NEFH	213221_s_at	SIK2
		206843_at	CRYBA4	1562828_at	1562828_at	205028_at	TRO	240027_at	LIN7A	236038_at	236038_at	206228_at	PAX2	202651_at	LPGAT1	204440_at	CD83	213279_at	DHRS1
		206846_s_at	HDAC6	1562948_at	1562948_at	205072_s_at	XRCC4	240112_at	240112_at	236125_at	236125_at	206239_s_at	SPINK1	202661_at	ITPR2	204451_at	FZD1	213317_at	CLIC5
		206959_s_at	UPF3A	1562957_at	1562957_at	205083_at	AOX1	240262_at	240262_at	236179_at	CDH11	206247_at	MICB	202670_at	MAP2K1	204493_at	BID	213325_at	PVRL3
		206982_at	CRYBA1	1563022_at	CCDC160	205121_at	SGCB	240326_at	240326_at	236377_at	TMEM132D	206286_s_at	206286_s_at	202672_s_at	ATF3	204508_s_at	CA12	213349_at	TMCC1
		207034_s_at	GLI2	1563321_s_at	MLLT10	205132_at	ACTC1	240419_at	SLC6A15	236734_at	SLITRK1	206290_s_at	RGS7	202712_s_at	202712_s_at	204542_at	ST6GALNAC2	213492_at	COL2A1
		207068_at	ZFP37	1563364_at	1563364_at	205143_at	NCAN	241044_x_at	241044_x_at	237375_at	237375_at	206302_s_at	206302_s_at	202719_s_at	TES	204567_s_at	ABCG1	213541_s_at	ERG
		207103_at	KCND2	1563455_at	SIK3	205347_s_at	205347_s_at	241049_at	GRM7	237585_at	C4orf47	206303_s_at	NUDT4	202720_at	TES	204600_at	EPHB3	213624_at	SMPDL3A
		207236_at	ZNF345	1563638_at	TVP23A	205362_s_at	PFDN4	241385_at	LARP7	237591_at	LINC00173	206309_at	LECT1	202723_s_at	FOXO1	204612_at	PKIA	213703_at	LINC00342
		207247_s_at	207247_s_at	1563724_at	1563724_at	205372_at	PLAG1	241693_at	241693_at	238057_at	USP45	206332_s_at	IFI16	202724_s_at	FOXO1	204621_s_at	NR4A2	213791_at	PENK
		207286_at	CEP135	1563881_at	MAGI1	205481_at	ADORA1	241780_at	241780_at	238727_at	238727_at	206429_at	F2RL1	202728_s_at	LTBP1	204622_x_at	NR4A2	213894_at	THSD7A
		207426_s_at	TNFSF4	1563975_at	RNF130	205583_s_at	ALG13	242455_at	POU3F2	238883_at	238883_at	206432_at	HAS2	202729_s_at	LTBP1	204668_at	RNF24	214053_at	ERBB4
		207443_at	NR2E1	1564139_at	A2M-AS1	205584_at	ALG13	242532_at	242532_at	238914_at	DCC	206456_at	GABRA5	202746_at	ITM2A	204669_s_at	RNF24	214146_s_at	PPBP
		207513_s_at	ZNF189	1564292_at	1564292_at	205613_at	SYT17	242899_at	SESN3	239031_at	SSTR2	206463_s_at	DHRS2	202747_s_at	ITM2A	204686_at	IRS1	214156_at	MYRIP
		207559_s_at	ZMYM3	1564383_s_at	FLJ35934	205646_s_at	PAX6	242906_at	SESN3	239058_at	FOXC2	206508_at	CD70	202759_s_at	202759_s_at	204712_at	WIF1	214254_at	MAGEA4
		207672_at	RFX4	1564580_at	1564580_at	205698_s_at	MAP2K6	243139_at	SV2C	239210_at	239210_at	206560_s_at	MIA	202760_s_at	202760_s_at	204745_x_at	MT1G	214274_s_at	ACAA1
		207724_s_at	SPAST	1564654_at	1564654_at	205699_at	MAP2K6	243140_at	ACTA2	239367_at	BDNF	206653_at	POLR3G	202790_at	CLDN7	204751_x_at	DSC2	214276_at	KLF12
		207728_at	ATF7IP	1564656_at	1564656_at	205830_at	CLGN	243483_at	TRPM8	239457_at	ATP8B3	206654_s_at	POLR3G	202847_at	PCK2	204753_s_at	HLF	214357_at	C1orf105
		207822_at	FGFR1	1564676_a_at	1564676_a_at	205873_at	PIGL	243735_at	ELP2	239487_at	239487_at	206741_at	SSUH2	202850_at	ABCD3	204755_x_at	HLF	214548_x_at	GNAS
		207920_x_at	ZFX	1565149_at	DYNC2H1	206098_at	ZBTB6	243995_at	PTAR1	239568_at	PLEKHH2	206752_s_at	DFFB	202854_at	HPRT1	204790_at	SMAD7	214582_at	PDE3B
		208109_s_at	LINC00597	1565269_s_at	ATF1	206114_at	EPHA4	244163_at	SEMA3A	239769_at	CDH11	206783_at	FGF4	202862_at	FAH	204850_s_at	DCX	214589_at	FGF12
		208215_x_at	DRD4	1565595_at	1565595_at	206254_at	EGF	244396_at	G3BP1	239973_at	239973_at	206803_at	PDYN	202880_s_at	CYTH1	204851_s_at	DCX	214603_at	214603_at
		208345_s_at	POU3F1	1565701_at	1565701_at	206404_at	FGF9	244419_at	FRZB	240397_x_at	240397_x_at	206806_at	DGKI	202887_s_at	DDIT4	204895_x_at	MUC4	214612_x_at	MAGEA6
		208436_s_at	IRF7	1565703_at	SMAD4	206424_at	CYP26A1	244439_at	SPRED1	241435_at	241435_at	207014_at	GABRA2	202923_s_at	GCLC	204952_at	LYPD3	214639_s_at	HOXA1
		208523_x_at	208523_x_at	1565743_at	1565743_at	206600_s_at	SLC16A5	244503_at	244503_at	241612_at	FOXD3	207057_at	SLC16A7	202934_at	HK2	204975_at	EMP2	214705_at	INADL
		208527_x_at	208527_x_at	1565748_at	LOC100132815	206652_at	ZMYM5	244840_x_at	DOCK4	241772_at	241772_at	207172_s_at	CDH11	202975_s_at	RHOBTB3	204994_at	MX2	214761_at	ZNF423
		208576_s_at	208576_s_at	1565786_x_at	1565786_x_at	206695_x_at	ZNF43	244849_at	SEMA3A	241832_at	FAM98A	207173_x_at	CDH11	202976_s_at	RHOBTB3	205054_at	NEB	214838_at	SFT2D2
		208579_x_at	208579_x_at	1565821_at	1565821_at	206718_at	LMO1	33148_at	ZFR	242045_at	242045_at	207230_at	CDON	203032_s_at	FH	205080_at	RARB	214858_at	PP14571
		208719_s_at	DDX17	1565830_at	1565830_at	206805_at	SEMA3A	40612_at	DOPEY1	242093_at	SYTL5	207267_s_at	RIPPLY3	203033_x_at	FH	205090_s_at	NAGPA	214920_at	THSD7A
		208860_s_at	ATRX	1565886_at	1565886_at	206848_at	206848_at			242385_at	RORB	207285_x_at	CSHL1	203044_at	CHSY1	205115_s_at	RBM19	214954_at	SUSD5
		208861_s_at	ATRX	1565889_at	1565889_at	206891_at	ACTN3			242408_at	STYX	207306_at	TCF15	203056_s_at	PRDM2	205116_at	LAMA2	214963_at	NUP160
		208913_at	GGA2	1565936_a_at	LMO3	206956_at	206956_at			242910_x_at	242910_x_at	207332_s_at	TFRC	203066_at	CHST15	205150_s_at	TRIL	215245_x_at	FMR1
		208927_at	SPOP	1565975_at	1565975_at	206960_at	LPAR4			243409_at	FOXL1	207343_at	LYZL6	203068_at	KLHL21	205151_s_at	TRIL	215465_at	ABCA12
		209102_s_at	HBP1	1566108_at	MYNN	207056_s_at	SLC4A8			243430_at	SEZ6	207455_at	P2RY1	203072_at	MYO1E	205207_at	IL6	215471_s_at	MAP7
		209150_s_at	TM9SF1	1566152_a_at	1566152_a_at	207062_at	IAPP			244159_at	244159_at	207957_s_at	PRKCB	203083_at	THBS2	205234_at	SLC16A4	215643_at	SEMA3D
		209158_s_at	CYTH2	1566166_at	1566166_at	207229_at	KLRAP1			244260_at	244260_at	207968_s_at	MEF2C	203106_s_at	VPS41	205249_at	EGR2	215702_s_at	CFTR
		209198_s_at	SYT11	1566901_at	TGIF1	207264_at	KDELR3			244472_at	TRABD2B	208018_s_at	HCK	203119_at	CCDC86	205259_at	NR3C2	215703_at	CFTR
		209201_x_at	CXCR4	1566959_at	1566959_at	207714_s_at	SERPINH1			37512_at	HSD17B6	208073_x_at	208073_x_at	203127_s_at	SPTLC2	205303_at	KCNJ8	215715_at	SLC6A2
		209220_at	GPC3	1567044_s_at	1567044_s_at	207799_x_at	ARMCX4			53720_at	C19orf66	208206_s_at	RASGRP2	203131_at	PDGFRA	205304_s_at	KCNJ8	215891_s_at	GM2A
		209271_at	BPTF	1567997_x_at	1567997_x_at	208079_s_at	AURKA					208268_at	ADAM28	203143_s_at	KIAA0040	205309_at	SMPDL3B	216037_x_at	TCF7L2
		209425_at	209425_at	1568605_at	JRK	208333_at	LHX5					208275_x_at	UTF1	203144_s_at	KIAA0040	205353_s_at	PEBP1	216184_s_at	RIMS1
		209426_s_at	209426_s_at	1568801_at	VWA9	208503_s_at	GATAD1					208286_x_at	208286_x_at	203148_s_at	TRIM14	205382_s_at	CFD	217388_s_at	KYNU
		209431_s_at	PATZ1	1568834_s_at	CCDC90B	208677_s_at	BSG					208306_x_at	208306_x_at	203152_at	MRPL40	205413_at	MPPED2	217404_s_at	COL2A1
		209435_s_at	ARHGEF2	1568873_at	ZNF519	208725_at	EIF2S2					208322_s_at	ST3GAL1	203157_s_at	GLS	205417_s_at	DAG1	217416_x_at	217416_x_at
		209589_s_at	EPHB2	1568920_at	1568920_at	208776_at	PSMD11					208334_at	NDST4	203158_s_at	GLS	205471_s_at	DACH1	217465_at	NCKAP1
		209617_s_at	CTNND2	1569069_s_at	TDRD3	208990_s_at	HNRNPH3					208356_x_at	CSH1	203159_at	GLS	205515_at	PRSS12	217499_x_at	217499_x_at
		209618_at	CTNND2	1569107_s_at	ZFP69	209098_s_at	JAG1					208357_x_at	CSH1	203162_s_at	KATNB1	205530_at	ETFDH	217623_at	MYLK3
		209682_at	CBLB	1569128_at	C3orf38	209099_x_at	JAG1					208606_s_at	WNT4	203163_at	KATNB1	205543_at	HSPA4L	217889_s_at	CYBRD1
		209748_at	SPAST	1569142_at	TRIM13	209356_x_at	EFEMP2					208658_at	PDIA4	203165_s_at	SLC33A1	205555_s_at	MSX2	217979_at	TSPAN13
		209788_s_at	ERAP1	1569149_at	PDLIM7	209395_at	CHI3L1					208661_s_at	208661_s_at	203167_at	TIMP2	205578_at	ROR2	217995_at	SQRDL
		209806_at	HIST1H2BK	1569150_x_at	PDLIM7	209430_at	BTAF1					208663_s_at	208663_s_at	203252_at	CDK2AP2	205619_s_at	MEOX1	218035_s_at	RBM47
		209848_s_at	PMEL	1569180_at	1569180_at	209436_at	SPON1					208664_s_at	208664_s_at	203304_at	BAMBI	205666_at	FMO1	218137_s_at	SMAP1
		209911_x_at	HIST1H2BD	1569181_x_at	1569181_x_at	209437_s_at	SPON1					208693_s_at	GARS	203320_at	SH2B3	205669_at	NCAM2	218175_at	CCDC92
		209925_at	OCLN	1569194_at	ZNF789	209582_s_at	CD200					208729_x_at	HLA-B	203323_at	CAV2	205673_s_at	ASB9	218330_s_at	NAV2
		209936_at	RBM5	1569238_a_at	1569238_a_at	209583_s_at	CD200					208905_at	CYCS	203324_s_at	CAV2	205709_s_at	CDS1	218373_at	AKTIP
		209939_x_at	CFLAR	1569320_at	GPBP1L1	209705_at	MTF2					208965_s_at	IFI16	203325_s_at	COL5A1	205730_s_at	ABLIM3	218409_s_at	DNAJC1
		210006_at	ABHD14A	1569323_at	PTPRG	209882_at	RIT1					208966_x_at	IFI16	203332_s_at	INPP5D	205747_at	CBLN1	218440_at	MCCC1
		210047_at	SLC11A2	1569354_at	1569354_at	210171_s_at	CREM					209030_s_at	CADM1	203339_at	SLC25A12	205807_s_at	TUFT1	218599_at	REC8
		210056_at	RND1	1569377_at	TMEM67	210281_s_at	ZMYM2					209032_s_at	CADM1	203340_s_at	SLC25A12	205817_at	SIX1	218677_at	S100A14
		210130_s_at	TM7SF2	1569450_at	CAPZA2	210282_at	ZMYM2					209036_s_at	MDH2	203348_s_at	ETV5	205880_at	PRKD1	218692_at	SYBU
		210137_s_at	DCTD	1569482_at	1569482_at	210302_s_at	MAB21L2					209140_x_at	HLA-B	203386_at	TBC1D4	205884_at	ITGA4	218706_s_at	GRAMD3
		210222_s_at	RTN1	1569512_at	1569512_at	210306_at	L3MBTL1					209180_at	RABGGTB	203387_s_at	TBC1D4	205888_s_at	JAKMIP2	218839_at	HEY1
		210266_s_at	TRIM33	1569540_at	1569540_at	210435_at	210435_at					209181_s_at	209181_s_at	203394_s_at	HES1	205894_at	ARSE	218885_s_at	GALNT12
		210323_at	TEKT2	1569681_at	1569681_at	210448_s_at	P2RX5					209193_at	PIM1	203397_s_at	GALNT3	205938_at	PPM1E	218963_s_at	KRT23
		210379_s_at	TLK1	1569713_at	SEC24B-AS1	210540_s_at	B4GALT4					209199_s_at	MEF2C	203405_at	PSMG1	205990_s_at	WNT5A	218964_at	ARID3B
		210381_s_at	CCKBR	1569751_at	TBC1D26	210567_s_at	SKP2					209200_at	MEF2C	203423_at	RBP1	206009_at	ITGA9	218966_at	MYO5C
		210387_at	210387_at	1569794_at	1569794_at	210694_s_at	MID1					209204_at	LMO4	203453_at	SCNN1A	206043_s_at	ATP2C2	219325_s_at	ELAC1
		210475_at	POU3F1	1569854_at	1569854_at	210701_at	CFDP1					209205_s_at	LMO4	203455_s_at	SAT1	206099_at	PRKCH	219412_at	RAB38
		210572_at	PCDHA2	1569940_at	SLC6A16	210707_x_at	DTX2P1-UPK3BP1-PMS2P11					209213_at	CBR1	203518_at	LYST	206100_at	CPM	219427_at	FAT4
		210581_x_at	PATZ1	1570014_at	1570014_at	210729_at	NPY2R					209233_at	EMG1	203556_at	ZHX2	206108_s_at	SRSF6	219431_at	ARHGAP10
		210658_s_at	GGA2	1570335_at	1570335_at	210812_at	XRCC4					209292_at	ID4	203568_s_at	TRIM38	206115_at	EGR3	219461_at	PAK6
		210716_s_at	CLIP1	1570388_a_at	LOC440896	210813_s_at	XRCC4					209312_x_at	209312_x_at	203579_s_at	SLC7A6	206119_at	BHMT	219580_s_at	TMC5
		210749_x_at	210749_x_at	1570507_at	SCAF11	210867_at	CNOT4					209392_at	ENPP2	203595_s_at	IFIT5	206159_at	GDF10	219602_s_at	PIEZO2
		210843_s_at	MFAP3L	1570575_at	1570575_at	211006_s_at	KCNB1					209398_at	HIST1H1C	203615_x_at	SULT1A1	206176_at	BMP6	219659_at	ATP8A2
		210854_x_at	SLC6A8	200041_s_at	200041_s_at	211022_s_at	ATRX					209406_at	BAG2	203633_at	CPT1A	206177_s_at	ARG1	219667_s_at	BANK1
		210892_s_at	GTF2I	200053_at	SPAG7	211386_at	MGC12488					209496_at	RARRES2	203704_s_at	RREB1	206189_at	UNC5C	219682_s_at	TBX3
		210945_at	COL4A6	200815_s_at	PAFAH1B1	211703_s_at	TM2D1					209529_at	PPAP2C	203710_at	ITPR1	206197_at	NME5	219732_at	LPPR1
		210993_s_at	SMAD1	200986_at	SERPING1	211998_at	211998_at					209536_s_at	EHD4	203789_s_at	SEMA3C	206200_s_at	ANXA11	219738_s_at	PCDH9
		210994_x_at	TRIM23	201147_s_at	TIMP3	212036_s_at	PNN					209574_s_at	LDLRAD4	203817_at	GUCY1B3	206214_at	PLA2G7	219749_at	SH2D4A
		210995_s_at	TRIM23	201245_s_at	OTUB1	212170_at	RBM12					209581_at	PLA2G16	203851_at	IGFBP6	206215_at	OPCML	219768_at	VTCN1
		211097_s_at	PBX2	201389_at	ITGA5	212179_at	PNISR					209598_at	PNMA2	203855_at	WDR47	206218_at	MAGEB2	219772_s_at	SMPX
		211110_s_at	AR	201445_at	CNN3	212190_at	SERPINE2					209621_s_at	PDLIM3	203892_at	WFDC2	206259_at	PROC	219851_at	ZNF613
		211165_x_at	EPHB2	201446_s_at	TIA1	212222_at	PSME4					209645_s_at	ALDH1B1	203921_at	CHST2	206263_at	FMO4	219858_s_at	MFSD6
		211267_at	HESX1	201447_at	TIA1	212340_at	YIPF6					209651_at	TGFB1I1	203928_x_at	MAPT	206291_at	NTS	219866_at	CLIC5
		211342_x_at	MED12	201448_at	TIA1	212341_at	YIPF6					209685_s_at	PRKCB	203929_s_at	MAPT	206385_s_at	ANK3	219889_at	FRAT1
		211391_s_at	PATZ1	201449_at	TIA1	212384_at	212384_at					209687_at	CXCL12	203960_s_at	HSPB11	206390_x_at	PF4	219935_at	ADAMTS5
		211559_s_at	CCNG2	201450_s_at	TIA1	212459_x_at	SUCLG2					209708_at	MOXD1	203964_at	NMI	206461_x_at	MT1H	219990_at	E2F8
		211596_s_at	LRIG1	201545_s_at	201545_s_at	212551_at	CAP2					209757_s_at	MYCN	203973_s_at	CEBPD	206498_at	OCA2	220138_at	HAND1
		211874_s_at	KAT6B	201571_s_at	DCTD	212557_at	ZNF451					209803_s_at	PHLDA2	203997_at	PTPN3	206542_s_at	SMARCA2	220139_at	DNMT3L
		211919_s_at	CXCR4	201709_s_at	NIPSNAP1	212596_s_at	HMGXB4					209818_s_at	HABP4	204001_at	SNAPC3	206544_x_at	SMARCA2	220180_at	CCDC68
		211928_at	DYNC1H1	201737_s_at	MARCH6	212609_s_at	AKT3					209840_s_at	LRRN3	204011_at	SPRY2	206571_s_at	MAP4K4	220283_at	HHIPL2
		211987_at	TOP2B	201765_s_at	HEXA	212650_at	EHBP1					209841_s_at	LRRN3	204032_at	BCAR3	206581_at	BNC1	220294_at	KCNV1
		211988_at	SMARCE1	201867_s_at	TBL1X	212679_at	TBL2					209842_at	SOX10	204034_at	ETHE1	206767_at	RBMS3	220493_at	DMRT1
		212062_at	ATP9A	201986_at	MED13	212706_at	212706_at					209859_at	TRIM9	204058_at	ME1	206770_s_at	SLC35A3	220945_x_at	MANSC1
		212076_at	KMT2A	201987_at	MED13	212744_at	BBS4					209968_s_at	NCAM1	204059_s_at	ME1	206799_at	SCGB1D2	221610_s_at	STAP2
		212090_at	GRINA	202020_s_at	LANCL1	212745_s_at	BBS4					209984_at	KDM4C	204089_x_at	MAP3K4	206849_at	GABRG2	221810_at	RAB15
		212109_at	HN1L	202035_s_at	SFRP1	212755_at	MON2					210001_s_at	SOCS1	204112_s_at	HNMT	207010_at	GABRB1	221893_s_at	ADCK2
		212126_at	CBX5	202036_s_at	SFRP1	212764_at	ZEB1					210032_s_at	SPAG6	204117_at	PREP	207038_at	SLC16A6	221942_s_at	GUCY1A3
		212138_at	PDS5A	202037_s_at	SFRP1	212774_at	ZBTB18					210050_at	TPI1	204119_s_at	ADK	207085_x_at	CSF2RA	222317_at	PDE3B
		212202_s_at	TMEM87A	202051_s_at	ZMYM4	212805_at	PRUNE2					210091_s_at	DTNA	204120_s_at	ADK	207233_s_at	MITF	222354_at	F11R
		212204_at	TMEM87A	202088_at	SLC39A6	212819_at	ASB1					210187_at	FKBP1A	204151_x_at	AKR1C1	207290_at	PLXNA2	222496_s_at	RBM47
		212238_at	ASXL1	202089_s_at	SLC39A6	212913_at	212913_at					210265_x_at	POU5F1P3	204169_at	IMPDH1	207302_at	SGCG	222620_s_at	DNAJC1
		212259_s_at	PBXIP1	202136_at	ZMYND11	212976_at	LRRC8B					210292_s_at	210292_s_at	204172_at	CPOX	207317_s_at	CASQ2	222621_at	DNAJC1
		212344_at	SULF1	202180_s_at	MVP	212991_at	FBXO9					210347_s_at	BCL11A	204215_at	TMEM243	207467_x_at	CAST	222670_s_at	MAFB
		212353_at	SULF1	202220_at	KIAA0907	213215_at	213215_at					210372_s_at	TPD52L1	204220_at	GMFG	207480_s_at	MEIS2	222691_at	SLC35B3
		212354_at	SULF1	202250_s_at	DCAF8	213220_at	BBIP1					210377_at	ACSM3	204224_s_at	GCH1	207610_s_at	EMR2	222730_s_at	ZDHHC2
		212358_at	CLIP3	202261_at	VPS72	213301_x_at	TRIM24					210396_s_at	210396_s_at	204247_s_at	CDK5	207676_at	ONECUT2	222748_s_at	TXNL4B
		212435_at	TRIM33	202304_at	FNDC3A	213309_at	PLCL2					210416_s_at	CHEK2	204256_at	ELOVL6	207717_s_at	PKP2	222773_s_at	GALNT12
		212452_x_at	KAT6B	202337_at	PMF1	213357_at	GTF2H5					210426_x_at	RORA	204260_at	CHGB	207725_at	POU4F2	222803_at	PRTFDC1
		212462_at	KAT6B	202561_at	TNKS	213362_at	PTPRD					210479_s_at	RORA	204269_at	PIM2	207808_s_at	PROS1	222830_at	GRHL1
		212553_at	RPRD2	202594_at	LEPROTL1	213403_at	213403_at					210534_s_at	B9D1	204271_s_at	EDNRB	207819_s_at	ABCB4	222833_at	LPCAT2
		212593_s_at	212593_s_at	202606_s_at	TLK1	213411_at	ADAM22					210587_at	INHBE	204273_at	EDNRB	207869_s_at	CACNA1G	222869_s_at	ELAC1
		212594_at	212594_at	202686_s_at	AXL	213482_at	DOCK3					210602_s_at	CDH6	204304_s_at	PROM1	207871_s_at	207871_s_at	222908_at	PIEZO2
		212606_at	WDFY3	202730_s_at	202730_s_at	213500_at	213500_at					210643_at	TNFSF11	204305_at	MIPEP	207950_s_at	ANK3	223182_s_at	AGPAT3
		212675_s_at	CEP68	202731_at	202731_at	213591_at	ALDH7A1					210645_s_at	210645_s_at	204316_at	RGS10	207996_s_at	LDLRAD4	223183_at	AGPAT3
		212677_s_at	CEP68	202765_s_at	FBN1	213661_at	PAMR1					210691_s_at	CACYBP	204320_at	COL11A1	208006_at	FOXI1	223194_s_at	SLC22A23
		212726_at	PHF2	202766_s_at	FBN1	213718_at	RBM4					210705_s_at	TRIM5	204337_at	RGS4	208025_s_at	HMGA2	223292_s_at	MRPS15
		212727_at	DLG3	202778_s_at	ZMYM2	213808_at	ADAM23					210721_s_at	PAK7	204342_at	SLC25A24	208161_s_at	ABCC3	223320_s_at	ABCB10
		212899_at	CDK19	202804_at	ABCC1	213837_at	L3MBTL1					210754_s_at	LYN	204363_at	F3	208165_s_at	PRSS16	223395_at	ABI3BP
		212905_at	CSTF2T	202979_s_at	CREBZF	213853_at	DNAJC24					210783_x_at	CLEC11A	204388_s_at	MAOA	208216_at	DLX4	223422_s_at	ARHGAP24
		212980_at	USP34	202986_at	ARNT2	213856_at	CD47					210807_s_at	SLC16A7	204389_at	MAOA	208369_s_at	GCDH	223544_at	TMEM79
		212986_s_at	TLK2	203145_at	SPAG5	213889_at	PIGL					210839_s_at	ENPP2	204407_at	TTF2	208484_at	HIST1H1A	223594_at	TMEM117
		213046_at	PABPN1	203212_s_at	MTMR2	213983_s_at	PDS5A					210905_x_at	POU5F1P4	204415_at	IFI6	208510_s_at	PPARG	223677_at	ATG10
		213155_at	213155_at	203247_s_at	ZNF24	213984_at	PDS5A					210950_s_at	FDFT1	204446_s_at	ALOX5	208530_s_at	RARB	223681_s_at	INADL
		213263_s_at	PCBP2	203249_at	EZH1	213993_at	SPON1					211276_at	TCEAL2	204465_s_at	INA	208540_x_at	208540_x_at	223695_s_at	ARSD
		213283_s_at	SALL2	203271_s_at	UNC119	213994_s_at	SPON1					211343_s_at	COL13A1	204466_s_at	SNCA	208581_x_at	MT1X	223696_at	ARSD
		213400_s_at	TBL1X	203299_s_at	AP1S2	214016_s_at	SFPQ					211363_s_at	MTAP	204467_s_at	SNCA	208613_s_at	FLNB	223703_at	C10orf11
		213405_at	RAB22A	203300_x_at	AP1S2	214043_at	PTPRD					211421_s_at	RET	204479_at	OSTF1	208621_s_at	EZR	223753_s_at	223753_s_at
		213413_at	STON1	203301_s_at	DMTF1	214093_s_at	FUBP1					211470_s_at	SULT1C2	204491_at	PDE4D	208622_s_at	EZR	223845_at	VSIG10
		213467_at	RND2	203302_at	DCK	214102_at	214102_at					211538_s_at	HSPA2	204497_at	ADCY9	208623_s_at	EZR	224499_s_at	AICDA
		213486_at	213486_at	203318_s_at	ZNF148	214116_at	BTD					211564_s_at	PDLIM4	204517_at	PPIC	208651_x_at	CD24	224950_at	PTGFRN
		213517_at	PCBP2	203319_s_at	ZNF148	214117_s_at	BTD					211675_s_at	MDFIC	204518_s_at	PPIC	208702_x_at	APLP2	224986_s_at	PDPK1
		213557_at	213557_at	203343_at	UGDH	214202_at	214202_at					211709_s_at	CLEC11A	204526_s_at	TBC1D8	208908_s_at	CAST	225078_at	EMP2
		213668_s_at	SOX4	203364_s_at	ATG13	214248_s_at	TRIM2					211739_x_at	CSH1	204527_at	MYO5A	208955_at	DUT	225079_at	EMP2
		213725_x_at	XYLT1	203409_at	DDB2	214250_at	NUMA1					211752_s_at	NDUFS7	204529_s_at	TOX	208956_x_at	DUT	225133_at	KLF3
		213742_at	SRSF11	203440_at	CDH2	214376_at	214376_at					211828_s_at	TNIK	204530_s_at	TOX	208960_s_at	KLF6	225144_at	BMPR2
		213772_s_at	GGA2	203441_s_at	CDH2	214409_at	RFPL3S					211911_x_at	HLA-B	204547_at	RAB40B	208961_s_at	KLF6	225145_at	NCOA5
		213843_x_at	SLC6A8	203494_s_at	CEP57	214473_x_at	PMS2P3					211949_s_at	NOLC1	204588_s_at	SLC7A7	208999_at	SEPT8	225259_at	RAB6B
		213912_at	TBC1D30	203562_at	FEZ1	214718_at	GATAD1					211990_at	HLA-DPA1	204591_at	CHL1	209008_x_at	KRT8	225262_at	FOSL2
		213913_s_at	TBC1D30	203588_s_at	TFDP2	214723_x_at	ANKRD36					212048_s_at	YARS	204608_at	ASL	209015_s_at	DNAJB6	225280_x_at	ARSD
		213920_at	CUX2	203597_s_at	WBP4	214731_at	214731_at					212092_at	PEG10	204613_at	PLCG2	209019_s_at	PINK1	225286_at	ARSD
		213979_s_at	CTBP1	203651_at	ZFYVE16	214753_at	N4BP2L2					212099_at	RHOB	204616_at	UCHL3	209094_at	DDAH1	225591_at	FBXO25
		213996_at	YPEL1	203654_s_at	COIL	214790_at	SENP6					212120_at	RHOQ	204646_at	DPYD	209103_s_at	UFD1L	225612_s_at	B3GNT5
		214036_at	EFNA5	203656_at	FIG4	214820_at	BRWD1					212181_s_at	212181_s_at	204654_s_at	TFAP2A	209155_s_at	NT5C2	225685_at	CDC42EP3
		214046_at	FUT9	203659_s_at	TRIM13	214835_s_at	SUCLG2					212183_at	NUDT4	204675_at	SRD5A1	209189_at	FOS	225720_at	SYNPO2
		214107_x_at	LOC440434	203675_at	NUCB2	215006_at	215006_at					212203_x_at	IFITM3	204681_s_at	RAPGEF5	209203_s_at	BICD2	225895_at	SYNPO2
		214132_at	ATP5C1	203724_s_at	RUFY3	215024_at	CCZ1B					212207_at	MED13L	204687_at	PARM1	209211_at	KLF5	225924_at	FNIP2
		214192_at	NUP88	203758_at	CTSO	215029_at	215029_at					212208_at	MED13L	204702_s_at	NFE2L3	209212_s_at	KLF5	225978_at	RIMKLB
		214266_s_at	PDLIM7	203796_s_at	BCL7A	215145_s_at	CNTNAP2					212209_at	MED13L	204720_s_at	DNAJC6	209260_at	SFN	226065_at	PRICKLE1
		214349_at	CTCF	203829_at	ELP4	215163_at	215163_at					212290_at	SLC7A1	204750_s_at	DSC2	209307_at	SWAP70	226068_at	SYK
		214393_at	RND2	203846_at	TRIM32	215167_at	MED14					212314_at	SEL1L3	204754_at	HLF	209324_s_at	RGS16	226069_at	PRICKLE1
		214469_at	214469_at	203874_s_at	SMARCA1	215203_at	GOLGA4					212413_at	SEPT6	204875_s_at	GMDS	209325_s_at	RGS16	226083_at	TMEM70
		214678_x_at	ZFX	203875_at	SMARCA1	215206_at	215206_at					212414_s_at	212414_s_at	204949_at	ICAM3	209331_s_at	MAX	226126_at	TBCK
		214782_at	CTTN	203882_at	IRF9	215228_at	NHLH2					212423_at	ZCCHC24	204979_s_at	SH3BGR	209355_s_at	PPAP2B	226137_at	ZFHX3
		214807_at	214807_at	203902_at	HEPH	215246_at	LARP7					212432_at	GRPEL1	204992_s_at	PFN2	209369_at	ANXA3	226145_s_at	FRAS1
		214909_s_at	DDAH2	203981_s_at	ABCD4	215281_x_at	POGZ					212488_at	COL5A1	205029_s_at	FABP7	209389_x_at	DBI	226353_at	SPPL2A
		214910_s_at	APOM	204055_s_at	CTAGE5	215286_s_at	PHTF2					212521_s_at	PDE8A	205030_at	FABP7	209441_at	RHOBTB2	226360_at	ZNRF3
		215038_s_at	SETD2	204078_at	LEPREL4	215322_at	LONRF1					212522_at	PDE8A	205047_s_at	ASNS	209444_at	RAP1GDS1	226363_at	ABCC5
		215071_s_at	HIST1H2AC	204088_at	P2RX4	215338_s_at	NKTR					212526_at	SPG20	205051_s_at	KIT	209493_at	PDZD2	226397_s_at	226397_s_at
		215090_x_at	LOC440434	204153_s_at	MFNG	215339_at	NKTR					212573_at	ENDOD1	205066_s_at	ENPP1	209504_s_at	PLEKHB1	226459_at	PIK3AP1
		215095_at	ESD	204193_at	CHKB	215351_at	RTCA					212631_at	STX7	205081_at	CRIP1	209515_s_at	RAB27A	226460_at	FNIP2
		215191_at	215191_at	204258_at	CHD1	215360_at	215360_at					212724_at	RND3	205111_s_at	PLCE1	209520_s_at	NCBP1	226489_at	TMCC3
		215211_at	RRN3P1	204310_s_at	NPR2	215392_at	215392_at					212730_at	SYNM	205112_at	PLCE1	209521_s_at	AMOT	226490_at	NHSL1
		215273_s_at	TADA3	204392_at	CAMK1	215412_x_at	215412_x_at					212793_at	DAAM2	205113_at	NEFM	209563_x_at	209563_x_at	226530_at	BMF
		215306_at	215306_at	204400_at	EFS	215470_at	215470_at					212841_s_at	PPFIBP2	205141_at	ANG	209590_at	BMP7	226535_at	ITGB6
		215386_at	215386_at	204417_at	GALC	215473_at	215473_at					212845_at	SAMD4A	205158_at	RNASE4	209591_s_at	BMP7	226743_at	SLFN11
		215390_at	215390_at	204424_s_at	LMO3	215479_at	215479_at					212915_at	PDZRN3	205190_at	PLS1	209602_s_at	GATA3	226756_at	CCDC71L
		215460_x_at	BRD1	204455_at	DST	215578_at	215578_at					213011_s_at	TPI1	205203_at	PLD1	209604_s_at	GATA3	226770_at	MAGI3
		215491_at	MYCL	204483_at	ENO3	215589_at	215589_at					213093_at	PRKCA	205222_at	EHHADH	209626_s_at	OSBPL3	226775_at	ENY2
		215508_at	BUB1	204639_at	ADA	215599_at	215599_at					213103_at	STARD13	205328_at	CLDN10	209684_at	RIN2	226803_at	CHMP4C
		215525_at	215525_at	204671_s_at	ANKRD6	215627_at	215627_at					213107_at	TNIK	205348_s_at	DYNC1I1	209686_at	S100B	226864_at	PKIA
		215537_x_at	DDAH2	204672_s_at	ANKRD6	215667_x_at	215667_x_at					213109_at	TNIK	205350_at	CRABP1	209700_x_at	PDE4DIP	226997_at	ADAMTS12
		215554_at	GPLD1	204706_at	INPP5E	215694_at	SPATA5L1					213134_x_at	BTG3	205352_at	SERPINI1	209706_at	NKX3-1	227045_at	ZNF614
		215605_at	NCOA2	204739_at	CENPC	215717_s_at	FBN2					213139_at	SNAI2	205373_at	CTNNA2	209710_at	GATA2	227095_at	LEPROT
		215612_at	215612_at	204743_at	TAGLN3	215731_s_at	MPHOSPH9					213234_at	KIAA1467	205376_at	INPP4B	209737_at	MAGI2	227179_at	STAU2
		215812_s_at	215812_s_at	204759_at	RCBTB2	215772_x_at	SUCLG2					213256_at	MARCH3	205399_at	DCLK1	209790_s_at	CASP6	227203_at	FBXL17
		215887_at	ZNF277	204862_s_at	NME3	215791_at	215791_at					213364_s_at	SNX1	205412_at	ACAT1	209824_s_at	ARNTL	227235_at	GUCY1A3
		215888_at	PDS5B	204909_at	DDX6	215854_at	215854_at					213416_at	213416_at	205475_at	SCRG1	209829_at	FAM65B	227256_at	USP31
		215894_at	PTGDR	204913_s_at	SOX11	216034_at	ZNF280A					213419_at	APBB2	205480_s_at	UGP2	209853_s_at	PSME3	227277_at	MTDH
		215910_s_at	FNDC3A	204914_s_at	SOX11	216094_at	216094_at					213428_s_at	COL6A1	205493_s_at	DPYSL4	209864_at	FRAT2	227318_at	TMEM178B
		215921_at	NPIPB3	204915_s_at	SOX11	216101_at	216101_at					213440_at	RAB1A	205498_at	GHR	209873_s_at	PKP3	227326_at	MXRA7
		215947_s_at	215947_s_at	204950_at	CARD8	216121_at	216121_at					213455_at	FAM114A1	205523_at	HAPLN1	209892_at	FUT4	227335_at	DIDO1
		216022_at	216022_at	204980_at	CLOCK	216170_at	216170_at					213479_at	NPTX2	205524_s_at	HAPLN1	209893_s_at	FUT4	227458_at	CD274
		216071_x_at	MED12	204982_at	GIT2	216195_at	ANK2					213506_at	F2RL1	205528_s_at	RUNX1T1	209913_x_at	AP5Z1	227475_at	FOXQ1
		216484_x_at	HDGF	205120_s_at	SGCB	216218_s_at	PLCL2					213508_at	SPTSSA	205529_s_at	RUNX1T1	209914_s_at	NRXN1	227554_at	MAGI2-AS3
		216836_s_at	ERBB2	205167_s_at	CDC25C	216268_s_at	JAG1					213524_s_at	G0S2	205532_s_at	CDH6	209915_s_at	NRXN1	227662_at	SYNPO2
		216959_x_at	NRCAM	205178_s_at	RBBP6	216525_x_at	PMS2P3					213601_at	213601_at	205542_at	STEAP1	209932_s_at	DUT	227711_at	GTSF1
		217028_at	CXCR4	205181_at	ZSCAN9	216527_at	216527_at					213666_at	SEPT6	205544_s_at	CR2	209960_at	HGF	227750_at	KALRN
		217122_s_at	217122_s_at	205185_at	SPINK5	216756_at	216756_at					213679_at	TTC30A	205608_s_at	ANGPT1	209994_s_at	209994_s_at	227853_at	227853_at
		217176_s_at	ZFX	205288_at	CDC14A	216765_at	MAP2K5					213704_at	213704_at	205609_at	ANGPT1	210002_at	GATA6	227889_at	LPCAT2
		217538_at	SGSM2	205340_at	ZBTB24	216843_x_at	PMS2P1					213712_at	ELOVL2	205625_s_at	CALB1	210017_at	MALT1	227935_s_at	PCGF5
		217574_at	CDH8	205380_at	PDZK1	216850_at	216850_at					213744_at	ATRNL1	205626_s_at	CALB1	210018_x_at	MALT1	227997_at	IL17RD
		217865_at	RNF130	205383_s_at	ZBTB20	216885_s_at	DCAF8					213836_s_at	WIPI1	205627_at	CDA	210026_s_at	CARD10	227998_at	S100A16
		217866_at	CPSF7	205408_at	MLLT10	216902_s_at	216902_s_at					213904_at	213904_at	205637_s_at	SH3GL3	210038_at	PRKCQ	228061_at	CCDC126
		217976_s_at	DYNC1LI1	205447_s_at	MAP3K12	216908_x_at	RRN3P1					213924_at	GNAL	205638_at	BAI3	210039_s_at	PRKCQ	228087_at	CCDC126
		218017_s_at	HGSNAT	205448_s_at	MAP3K12	216957_at	USP22					213946_s_at	OBSL1	205641_s_at	TRADD	210046_s_at	IDH2	228123_s_at	ABHD12
		218023_s_at	FAM53C	205497_at	ZNF175	217010_s_at	CDC25C					213948_x_at	CADM3	205677_s_at	DLEU1	210074_at	CTSV	228124_at	ABHD12
		218113_at	TMEM2	205505_at	GCNT1	217100_s_at	UBXN7					214011_s_at	NOP16	205696_s_at	GFRA1	210078_s_at	KCNAB1	228142_at	UQCR10
		218128_at	NFYB	205510_s_at	FLJ10038	217104_at	ST20					214071_at	GNAL	205719_s_at	PAH	210087_s_at	MPZL1	228221_at	SLC44A3
		218174_s_at	TMEM254	205511_at	FLJ10038	217216_x_at	MLH3					214078_at	214078_at	205722_s_at	GFRA2	210112_at	HPS1	228262_at	MAP7D2
		218223_s_at	PLEKHO1	205514_at	ZNF415	217482_at	217482_at					214079_at	DHRS2	205749_at	CYP1A1	210287_s_at	FLT1	228367_at	ALPK2
		218242_s_at	SUV420H1	205571_at	LIPT1	217536_x_at	217536_x_at					214231_s_at	VWA8	205750_at	BPHL	210305_at	PDE4DIP	228375_at	IGSF11
		218309_at	CAMK2N1	205647_at	RAD52	217546_at	MT1M					214238_at	214238_at	205818_at	BRINP1	210315_at	SYN2	228396_at	PRKG1
		218376_s_at	MICAL1	205659_at	HDAC9	217594_at	ZCCHC11					214298_x_at	SEPT6	205850_s_at	GABRB3	210383_at	SCN1A	228411_at	PARD3B
		218421_at	CERK	206053_at	ZNF510	217627_at	ZNF573					214434_at	HSPA12A	205870_at	BDKRB2	210432_s_at	SCN3A	228486_at	SLC44A1
		218445_at	H2AFY2	206213_at	WNT10B	217653_x_at	217653_x_at					214449_s_at	RHOQ	205872_x_at	PDE4DIP	210471_s_at	KCNAB1	228504_at	SCN7A
		218569_s_at	KBTBD4	206306_at	RYR3	217671_at	DSERG1					214451_at	TFAP2B	205895_s_at	NOLC1	210547_x_at	ICA1	228646_at	PPP1R1C
		218570_at	218570_at	206445_s_at	PRMT1	217759_at	TRIM44					214532_x_at	POU5F1B	205923_at	RELN	210650_s_at	PCLO	228935_at	SLC4A8
		218641_at	C11orf95	206470_at	PLXNC1	217760_at	TRIM44					214595_at	KCNG1	205932_s_at	MSX1	210681_s_at	USP15	228949_at	WLS
		218770_s_at	TMEM39B	206572_x_at	ZNF85	218125_s_at	CCDC25					214687_x_at	ALDOA	205977_s_at	EPHA1	210695_s_at	WWOX	228962_at	PDE4D
		218855_at	TPRA1	206613_s_at	TAF1A	218325_s_at	DIDO1					214993_at	ASPHD1	205992_s_at	IL15	210706_s_at	RNF24	229084_at	CNTN4
		218874_s_at	ATAT1	206636_at	RASA2	218362_s_at	DIS3					215054_at	EPOR	206018_at	FOXG1	210755_at	HGF	229199_at	SCN9A
		218879_s_at	MTHFSD	206696_at	GPR143	218422_s_at	RBM26					215193_x_at	215193_x_at	206023_at	NMU	210764_s_at	CYR61	229276_at	IGSF9
		218980_at	FHOD3	206731_at	CNKSR2	218456_at	CAPRIN2					215195_at	PRKCA	206028_s_at	MERTK	210788_s_at	DHRS7	229526_at	AQP11
		219010_at	C1orf106	206789_s_at	POU2F1	218486_at	KLF11					215236_s_at	PICALM	206029_at	ANKRD1	210809_s_at	POSTN	229530_at	GUCY1A3
		219235_s_at	PHACTR4	206833_s_at	ACYP2	218521_s_at	UBE2W					215271_at	TNN	206033_s_at	DSC3	210837_s_at	PDE4D	229638_at	IRX3
		219250_s_at	FLRT3	206862_at	ZNF254	218541_s_at	C8orf4					215501_s_at	DUSP10	206066_s_at	RAD51C	210840_s_at	IQGAP1	229744_at	SSFA2
		219292_at	THAP1	206900_x_at	ZNF253	218638_s_at	218638_s_at					215811_at	215811_at	206085_s_at	CTH	210841_s_at	NRP2	229800_at	DCLK1
		219314_s_at	ZNF219	206958_s_at	UPF3A	218771_at	PANK4					216039_at	GABRA2	206090_s_at	206090_s_at	210915_x_at	TRBC1	229928_at	229928_at
		219366_at	AVEN	207078_at	MED6	218783_at	INTS7					216231_s_at	B2M	206103_at	RAC3	210943_s_at	LYST	229929_at	SPSB4
		219400_at	CNTNAP1	207090_x_at	ZFP30	218870_at	ARHGAP15					216259_at	LOC100506699	206132_at	MCC	210949_s_at	210949_s_at	229975_at	BMPR1B
		219433_at	BCOR	207125_at	ZNF225	218877_s_at	TRMT11					216319_at	216319_at	206137_at	RIMS2	210951_x_at	RAB27A	230006_s_at	SVIP
		219451_at	MSRB2	207127_s_at	HNRNPH3	218945_at	METTL22					216526_x_at	HLA-C	206167_s_at	ARHGAP6	210954_s_at	TSC22D2	230026_at	MRPL43
		219543_at	PBLD	207169_x_at	207169_x_at	219094_at	ARMC8					216685_s_at	MTAP	206170_at	ADRB2	210971_s_at	ARNTL	230109_at	PDE7B
		219549_s_at	RTN3	207183_at	GPR19	219160_s_at	PAPOLG					216733_s_at	GATM	206204_at	GRB14	210991_s_at	RIMS3	230131_x_at	ARSD
		219565_at	CYP20A1	207186_s_at	207186_s_at	219232_s_at	EGLN3					216874_at	LOC100505498	206217_at	EDA	211026_s_at	MGLL	230135_at	HHIP
		219670_at	BEND5	207219_at	ZFP69B	219294_at	CENPQ					216967_at	GAP43	206258_at	ST8SIA5	211029_x_at	FGF18	230152_at	WDR52
		219696_at	DENND1B	207234_at	RFX3	219300_s_at	CNTNAP2					217140_s_at	VDAC1	206271_at	TLR3	211070_x_at	DBI	230238_at	SOWAHA
		219726_at	NLGN3	207331_at	CENPF	219353_at	NHLRC2					217294_s_at	ENO1	206272_at	206272_at	211203_s_at	CNTN1	230249_at	KHDRBS3
		219798_s_at	MEPCE	207345_at	FST	219415_at	TTYH1					217383_at	PGK1	206307_s_at	FOXD1	211275_s_at	GYG1	230252_at	LPAR5
		219800_s_at	THNSL1	207357_s_at	GALNT10	219522_at	FJX1					217861_s_at	PREB	206310_at	SPINK2	211286_x_at	CSF2RA	230285_at	SVIP
		219820_at	SLC6A16	207358_x_at	MACF1	219557_s_at	NRIP3					217983_s_at	RNASET2	206336_at	CXCL6	211419_s_at	CHN2	230448_at	SLC38A10
		219849_at	ZNF671	207417_s_at	207417_s_at	219603_s_at	ZNF226					217984_at	RNASET2	206363_at	MAF	211456_x_at	MT1HL1	230604_at	230604_at
		219905_at	ERMAP	207437_at	NOVA1	219679_s_at	WAC					217985_s_at	BAZ1A	206401_s_at	MAPT	211546_x_at	SNCA	230708_at	PRICKLE1
		219906_at	EBLN2	207757_at	ZFP2	219736_at	TRIM36					217992_s_at	EFHD2	206412_at	FER	211597_s_at	HOPX	230734_x_at	STRN
		219926_at	POPDC3	207781_s_at	ZNF711	219794_at	VPS53					218025_s_at	ECI2	206460_at	AJAP1	211730_s_at	POLR2L	230781_at	LOC100505875
		220040_x_at	ZC4H2	207839_s_at	TMEM8B	219817_at	MAPKAPK5-AS1					218084_x_at	FXYD5	206497_at	COA1	211744_s_at	CD58	230867_at	COL6A6
		220055_at	ZNF287	207983_s_at	STAG2	219831_at	CDKL3					218162_at	OLFML3	206528_at	TRPC6	211779_x_at	AP2A2	230908_at	TACR1
		220190_s_at	220190_s_at	207987_s_at	GNRH1	219843_at	IPP					218189_s_at	NANS	206541_at	KLKB1	211781_x_at	211781_x_at	231313_at	231313_at
		220220_at	LRRC37A4P	208015_at	SMAD1	219880_at	219880_at					218251_at	MID1IP1	206552_s_at	TAC1	211926_s_at	MYH9	231399_at	RAB3IP
		220221_at	VPS13D	208036_at	OPN1SW	219881_s_at	219881_s_at					218299_at	C11orf24	206591_at	RAG1	211984_at	211984_at	231445_at	PAX1
		220261_s_at	ZDHHC4	208054_at	HERC4	219892_at	TM6SF1					218332_at	BEX1	206632_s_at	APOBEC3B	211985_s_at	211985_s_at	231504_at	CCDC148
		220296_at	GALNT10	208089_s_at	TDRD3	219945_at	DDX25					218364_at	LRRFIP2	206662_at	GLRX	212041_at	ATP6V0D1	231511_at	FRAS1
		220301_at	CCDC102B	208119_s_at	ZNF93	220021_at	TMC7					218368_s_at	TNFRSF12A	206683_at	ZNF165	212096_s_at	MTUS1	231771_at	GJB6
		220302_at	MAK	208131_s_at	PTGIS	220022_at	ZNF334					218468_s_at	GREM1	206686_at	PDK1	212097_at	CAV1	231947_at	MYCT1
		220321_s_at	CCDC121	208633_s_at	MACF1	220117_at	ZNF385D					218469_at	GREM1	206701_x_at	EDNRB	212098_at	MGAT5	232089_at	232089_at
		220338_at	RALGPS2	208634_s_at	MACF1	220231_at	PPP1R17					218502_s_at	TRPS1	206704_at	CLCN5	212135_s_at	ATP2B4	232103_at	BPNT1
		220340_at	GREB1L	208707_at	EIF5	220238_s_at	KLHL7					218589_at	LPAR6	206707_x_at	FAM65B	212136_at	ATP2B4	232164_s_at	EPPK1
		220345_at	LRRTM4	208723_at	USP11	220269_at	ZBBX					218686_s_at	RHBDF1	206710_s_at	EPB41L3	212159_x_at	AP2A2	232165_at	EPPK1
		220393_at	LGSN	208749_x_at	FLOT1	220360_at	THAP9					218786_at	NT5DC3	206751_s_at	PCYT1B	212185_x_at	MT2A	232202_at	FAM83B
		220409_at	CAMSAP1	208779_x_at	208779_x_at	220381_at	ARHGAP28					218793_s_at	SCML1	206801_at	NPPB	212197_x_at	MPRIP	232322_x_at	STARD10
		220474_at	SLC25A21	208829_at	TAPBP	220426_at	C20orf195					218806_s_at	VAV3	206837_at	ALX1	212226_s_at	PPAP2B	232336_at	ZSWIM5
		220519_s_at	LIM2	208851_s_at	THY1	220436_at	LOC441402					218807_at	VAV3	206907_at	TNFSF9	212230_at	PPAP2B	232656_at	232656_at
		220533_at	220533_at	208859_s_at	ATRX	220549_at	220549_at					218872_at	TESC	206941_x_at	SEMA3E	212239_at	PIK3R1	232899_at	232899_at
		220546_at	KMT2A	208914_at	GGA2	220572_at	LOC100506282					218893_at	ISOC2	206987_x_at	FGF18	212240_s_at	PIK3R1	233371_at	ABCC13
		220667_at	USP49	209005_at	FBXL5	220609_at	LOC202181					218918_at	MAN1C1	207000_s_at	PPP3CC	212248_at	MTDH	233386_at	233386_at
		220727_at	KCNK10	209022_at	STAG2	220692_at	MIR4448					218976_at	DNAJC12	207099_s_at	CHM	212257_s_at	SMARCA2	233516_s_at	SPAG17
		220746_s_at	UIMC1	209023_s_at	STAG2	220716_at	GNL3LP1					219195_at	PPARGC1A	207122_x_at	SULT1A2	212298_at	NRP1	233615_at	CGA
		220777_at	KIF13A	209153_s_at	TCF3	220751_s_at	FAXDC2					219202_at	RHBDF2	207129_at	CA5B	212338_at	MYO1D	234111_at	234111_at
		220817_at	TRPC4	209197_at	SYT11	220770_s_at	C5orf54					219272_at	TRIM62	207174_at	GPC5	212350_at	TBC1D1	234190_at	234190_at
		220818_s_at	TRPC4	209208_at	MPDU1	220977_x_at	EPB41L5					219277_s_at	OGDHL	207197_at	ZIC3	212390_at	212390_at	235033_at	NPEPL1
		220887_at	CCDC177	209240_at	OGT	221045_s_at	PER3					219289_at	HEATR3	207275_s_at	ACSL1	212415_at	SEPT6	235062_at	PIH1D2
		220911_s_at	NYNRIN	209285_s_at	FAM208A	221138_s_at	221138_s_at					219341_at	CLN8	207327_at	EYA4	212418_at	ELF1	235068_at	ZDHHC21
		220979_s_at	ST6GALNAC5	209315_at	HBS1L	221213_s_at	ZNF280D					219390_at	FKBP14	207387_s_at	GK	212473_s_at	MICAL2	235267_at	MAGI2-AS3
		220987_s_at	220987_s_at	209368_at	EPHX2	221233_s_at	FAM135A					219454_at	EGFL6	207522_s_at	ATP2A3	212558_at	SPRY1	235331_x_at	PCGF5
		221086_s_at	FEZF2	209396_s_at	CHI3L1	221285_at	ST8SIA2					219474_at	C3orf52	207528_s_at	SLC7A11	212586_at	CAST	235384_at	NUDT19
		221221_s_at	KLHL3	209403_at	209403_at	221290_s_at	MUM1					219496_at	SOWAHC	207558_s_at	PITX2	212642_s_at	HIVEP2	235385_at	MARCH1
		221230_s_at	ARID4B	209408_at	KIF2C	221768_at	SFPQ					219497_s_at	BCL11A	207574_s_at	GADD45B	212686_at	PPM1H	235424_at	235424_at
		221245_s_at	FZD5	209525_at	HDGFRP3	221816_s_at	PHF11					219498_s_at	BCL11A	207686_s_at	CASP8	212703_at	TLN2	235438_at	235438_at
		221276_s_at	SYNC	209560_s_at	DLK1	221864_at	ORAI3					219551_at	EAF2	207843_x_at	CYB5A	212720_at	PAPOLA	235475_at	SERP1
		221410_x_at	PCDHB3	209571_at	CIR1	221879_at	CALML4					219562_at	RAB26	207850_at	CXCL3	212737_at	GM2A	235497_at	LOC643837
		221427_s_at	CCNL2	209578_s_at	POFUT2	221899_at	N4BP2L2					219615_s_at	KCNK5	207891_s_at	207891_s_at	212786_at	CLEC16A	235630_at	235630_at
		221595_at	RBM48	209657_s_at	HSF2	221950_at	EMX2					219628_at	ZMAT3	207981_s_at	ESRRG	212848_s_at	C9orf3	235735_at	TNFSF8
		221596_s_at	RBM48	209726_at	CA11	221965_at	MPHOSPH9					219654_at	PTPLA	208002_s_at	ACOT7	212859_x_at	MT1E	235882_at	VPS53
		221616_s_at	TAF9B	209750_at	NR1D2	221971_x_at	221971_x_at					219700_at	PLXDC1	208012_x_at	SP110	212886_at	CCDC69	235924_at	235924_at
		221617_at	TAF9B	209805_at	209805_at	221988_at	SMIM7					219740_at	VASH2	208047_s_at	NAB1	212890_at	SLC38A10	236009_at	PERP
		221618_s_at	TAF9B	209815_at	PTCH1	222001_x_at	222001_x_at					219877_at	ZMAT4	208064_s_at	ST8SIA3	212907_at	SLC30A1	236029_at	FAT3
		221869_at	ZNF512B	209816_at	PTCH1	222008_at	COL9A1					219895_at	TMEM255A	208065_at	ST8SIA3	212912_at	RPS6KA2	236085_at	CAPSL
		221872_at	RARRES1	209847_at	CDH17	222128_at	NSUN6					219938_s_at	PSTPIP2	208078_s_at	208078_s_at	212946_at	VWA8	236129_at	GALNT5
		221880_s_at	FAM174B	209871_s_at	APBA2	222266_at	222266_at					219955_at	L1TD1	208092_s_at	FAM49A	212989_at	SGMS1	236175_at	TRIM55
		221951_at	TMEM80	209883_at	COLGALT2	222273_at	PAPOLG					219958_at	TMEM74B	208096_s_at	COL21A1	213022_s_at	UTRN	236220_at	236220_at
		222016_s_at	ZSCAN31	210069_at	210069_at	222286_at	SNAPC3					219992_at	TAC3	208116_s_at	MAN1A1	213085_s_at	WWC1	236255_at	PLEKHG4B
		222018_at	NACA	210070_s_at	210070_s_at	222325_at	222325_at					220014_at	PRR16	208146_s_at	CPVL	213094_at	GPR126	236264_at	LPHN3
		222058_at	RNF130	210110_x_at	HNRNPH3	222358_x_at	222358_x_at					220156_at	EFCAB1	208221_s_at	208221_s_at	213122_at	TSPYL5	236276_at	236276_at
		222067_x_at	HIST1H2BD	210142_x_at	FLOT1	222375_at	222375_at					220178_at	MFSD12	208294_x_at	CSHL1	213169_at	SEMA5A	236448_at	UNC5A
		222180_at	222180_at	210172_at	SF1	222380_s_at	PDCD6					220184_at	NANOG	208295_x_at	CSHL1	213217_at	ADCY2	236451_at	236451_at
		222212_s_at	CERS2	210203_at	CNOT4	222595_s_at	DIDO1					220384_at	NME8	208341_x_at	CSH2	213238_at	ATP10D	236543_at	236543_at
		222217_s_at	SLC27A3	210220_at	FZD2	222626_at	RBM26					220714_at	PRDM14	208358_s_at	UGT8	213260_at	FOXC1	236576_at	236576_at
		222291_at	FAM149A	210296_s_at	PEX2	222667_s_at	ASH1L					220807_at	HBQ1	208365_s_at	GRK4	213307_at	SHANK2	236634_at	C8orf48
		222313_at	222313_at	210303_at	MAB21L2	222759_at	SUV420H1					220868_s_at	SLC7A10	208370_s_at	RCAN1	213308_at	SHANK2	236656_s_at	LOC100288911
		222315_at	222315_at	210409_at	MLLT4-AS1	222772_at	MYEF2					221019_s_at	COLEC12	208425_s_at	TANC2	213332_at	PAPPA2	236657_at	LOC100288911
		222336_at	SMIM14	210445_at	FABP6	222778_s_at	WHSC1					221044_s_at	221044_s_at	208624_s_at	EIF4G1	213342_at	YAP1	236824_at	TMEM132B
		222344_at	222344_at	210492_at	MFAP3L	222847_s_at	EGLN3					221107_at	CHRNA9	208644_at	PARP1	213409_s_at	RHEB	236849_at	VTI1A
		222566_at	SUV420H1	210493_s_at	MFAP3L	222900_at	NRIP3					221173_at	USH1C	208650_s_at	CD24	213425_at	WNT5A	237466_s_at	HHIP
		222715_s_at	SYNRG	210563_x_at	CFLAR	222941_at	USP46					221448_s_at	TEX15	208653_s_at	CD164	213429_at	BICC1	238049_at	GRAMD3
		222783_s_at	SMOC1	210588_x_at	HNRNPH3	223038_s_at	FAM60A					221510_s_at	GLS	208690_s_at	PDLIM1	213456_at	SOSTDC1	238116_at	DYNLRB2
		222784_at	SMOC1	210598_at	210598_at	223041_at	CD99L2					221524_s_at	RRAGD	208714_at	NDUFV1	213519_s_at	LAMA2	238164_at	USP6NL-IT1
		222787_s_at	TMEM106B	210630_s_at	RAD52	223155_at	HDHD2					221563_at	DUSP10	208781_x_at	SNX3	213558_at	PCLO	238184_at	238184_at
		222800_at	TRNAU1AP	210631_at	NF1	223254_s_at	G2E3					221620_s_at	APOO	208812_x_at	HLA-C	213581_at	PDCD2	238335_at	DNAJC21
		222820_at	TNRC6C	210714_at	R3HDM1	223256_at	G2E3					221666_s_at	PYCARD	208813_at	GOT1	213587_s_at	ATP6V0E2	238467_at	238467_at
		222853_at	FLRT3	210742_at	CDC14A	223257_at	G2E3					221675_s_at	CHPT1	208816_x_at	ANXA2P2	213618_at	ARAP2	238521_at	FGF12
		222863_at	ZBTB10	210743_s_at	CDC14A	223348_x_at	MUM1					221801_x_at	NEFL	208933_s_at	LGALS8	213629_x_at	MT1F	238574_at	SLC25A51
		222936_s_at	DESI2	210871_x_at	SSX2IP	223472_at	WHSC1					221805_at	NEFL	208934_s_at	LGALS8	213638_at	PHACTR1	238721_at	MDH1B
		222995_s_at	RHBDD2	210875_s_at	ZEB1	223478_at	TIMM8B					221875_x_at	HLA-F	208935_s_at	LGALS8	213707_s_at	DLX5	238762_at	MTHFD2L
		222999_s_at	CCNL2	210880_s_at	EFS	223494_at	MGEA5					221927_s_at	ABHD11	208936_x_at	LGALS8	213802_at	PRSS12	238786_at	ANK3
		223013_at	TBL1XR1	210910_s_at	POMZP3	223568_s_at	PPAPDC1B					222062_at	IL27RA	208949_s_at	LGALS3	213832_at	KCND3	239866_at	239866_at
		223115_at	MED17	210962_s_at	AKAP9	223584_s_at	KBTBD2					222071_s_at	SLCO4C1	208967_s_at	AK2	213870_at	COL11A2	240180_at	240180_at
		223126_s_at	C1orf21	211077_s_at	TLK1	223588_at	THAP2					222088_s_at	222088_s_at	208972_s_at	ATP5G1	214056_at	MCL1	240304_s_at	TMC5
		223161_at	KIAA1147	211220_s_at	HSF2	223606_x_at	GPALPP1					222116_s_at	TBC1D16	209031_at	CADM1	214070_s_at	ATP10B	240312_at	LOC389895
		223162_s_at	KIAA1147	211257_x_at	ZNF638	223642_at	ZIC2					222162_s_at	ADAMTS1	209070_s_at	RGS5	214075_at	NENF	240436_at	MIPEPP3
		223165_s_at	IP6K2	211310_at	EZH1	223644_s_at	CRYGS					222486_s_at	ADAMTS1	209071_s_at	RGS5	214082_at	CA5B	240570_at	INADL
		223169_s_at	RHOU	211375_s_at	ILF3	223794_at	ARMC4					222502_s_at	UFM1	209083_at	CORO1A	214091_s_at	GPX3	241255_at	241255_at
		223177_at	NT5DC1	211422_at	TRPM3	223815_at	CEP95					222651_s_at	TRPS1	209159_s_at	NDRG4	214095_at	SHMT2	241426_at	CEP44
		223178_s_at	NT5DC1	211547_s_at	PAFAH1B1	223842_s_at	SCARA3					222713_s_at	FANCF	209160_at	AKR1C3	214140_at	SLC25A16	241933_at	QRSL1
		223311_s_at	MTA3	211621_at	AR	223882_at	FAM172A					222747_s_at	SCML1	209163_at	CYB561	214154_s_at	PKP2	241956_at	241956_at
		223352_s_at	C17orf80	211953_s_at	IPO5	223985_at	FSD1L					222874_s_at	CLN8	209164_s_at	CYB561	214164_x_at	CA12	241998_at	C2orf80
		223358_s_at	PDE7A	211954_s_at	IPO5	223997_at	FNIP1					222891_s_at	BCL11A	209196_at	WDR46	214203_s_at	PRODH	242002_at	NKAIN2
		223370_at	PLEKHA3	211955_at	IPO5	224048_at	USP44					222895_s_at	BCL11B	209236_at	SLC23A2	214204_at	PACRG	242009_at	SLC6A4
		223468_s_at	RGMA	211976_at	211976_at	224107_at	224107_at					223079_s_at	GLS	209264_s_at	TSPAN4	214246_x_at	MINK1	242127_at	242127_at
		223479_s_at	CHCHD5	212000_at	SUGP2	224227_s_at	BDP1					223107_s_at	ZCCHC17	209267_s_at	SLC39A8	214396_s_at	MBD2	242300_at	242300_at
		223537_s_at	WNT5B	212016_s_at	PTBP1	224325_at	FZD8					223108_s_at	ZCCHC17	209272_at	NAB1	214397_at	MBD2	242396_at	NR2F2-AS1
		223552_at	LRRC4	212026_s_at	EXOC7	224525_s_at	OLA1					223151_at	DCUN1D5	209276_s_at	GLRX	214401_at	PAX1	242579_at	BMPR1B
		223566_s_at	BCOR	212078_s_at	KMT2A	224676_at	TMED4					223193_x_at	FAM162A	209278_s_at	TFPI2	214586_at	GPR37	242733_at	242733_at
		223575_at	KIAA1549	212079_s_at	KMT2A	224691_at	UHMK1					223398_at	C9orf89	209291_at	ID4	214661_s_at	NOP14	242738_s_at	ZFHX3
		223629_at	PCDHB5	212080_at	KMT2A	224755_at	TM9SF3					223402_at	DUSP23	209293_x_at	ID4	214696_at	214696_at	242775_at	242775_at
		223673_at	RFX4	212153_at	POGZ	224763_at	224763_at					223519_at	ZAK	209301_at	CA2	214729_at	TWISTNB	242943_at	ST8SIA4
		223827_at	TNFRSF19	212176_at	PNISR	224766_at	224766_at					223580_at	SPSB2	209304_x_at	GADD45B	214755_at	UAP1L1	243018_at	243018_at
		223875_s_at	EPC1	212177_at	PNISR	224767_at	224767_at					223654_s_at	CELF4	209305_s_at	GADD45B	214765_s_at	NAAA	243174_at	243174_at
		224046_s_at	PDE7A	212232_at	FNBP4	224843_at	SLAIN2					223672_at	SGIP1	209339_at	SIAH2	214771_x_at	MPRIP	243278_at	FOXP2
		224061_at	INMT	212256_at	GALNT10	224849_at	TTC17					223693_s_at	RADIL	209343_at	EFHD1	214783_s_at	ANXA11	243302_at	243302_at
		224092_at	BARHL1	212321_at	SGPL1	224852_at	TTC17					223721_s_at	DNAJC12	209348_s_at	MAF	214803_at	CDH6	243386_at	CASZ1
		224110_at	PRO1804	212366_at	ZNF292	224875_at	C5orf24					223734_at	MGARP	209366_x_at	CYB5A	214961_at	MTUS2	243421_at	243421_at
		224219_s_at	TRPC4	212368_at	ZNF292	224938_at	NUFIP2					223748_at	SLC4A11	209457_at	DUSP5	215044_s_at	STAM2	243586_at	243586_at
		224220_x_at	TRPC4	212427_at	KIAA0368	224939_at	NUFIP2					223962_at	TTC29	209459_s_at	ABAT	215091_s_at	GTF3A	243756_at	243756_at
		224322_at	ARID4B	212447_at	KBTBD2	225012_at	HDLBP					224218_s_at	TRPS1	209460_at	ABAT	215230_x_at	215230_x_at	243844_at	243844_at
		224327_s_at	DGAT2	212463_at	CD59	225055_at	LINC00674					224252_s_at	FXYD5	209469_at	GPM6A	215321_at	RUNDC3B	243940_at	TSHZ2
		224492_s_at	ZNF627	212468_at	SPAG9	225123_at	SESN3					224345_x_at	FAM162A	209470_s_at	GPM6A	215343_at	CCDC88C	243994_at	243994_at
		224710_at	224710_at	212470_at	SPAG9	225159_s_at	ELK4					224482_s_at	RAB11FIP4	209473_at	ENTPD1	215356_at	TDRD12	243998_at	KRT222
		224770_s_at	NAV1	212498_at	MARCH6	225193_at	CCAR2					224565_at	224565_at	209480_at	HLA-DQB1	215388_s_at	215388_s_at	244403_at	CRB1
		224771_at	NAV1	212534_at	ZNF24	225237_s_at	MSI2					224566_at	224566_at	209505_at	209505_at	215448_at	215448_at	244675_at	RGS8
		224773_at	NAV1	212542_s_at	PHIP	225238_at	MSI2					224654_at	DDX21	209506_s_at	NR2F1	215528_at	215528_at	33197_at	MYO7A
		224774_s_at	NAV1	212549_at	STAT5B	225240_s_at	MSI2					224707_at	CYSTM1	209545_s_at	RIPK2	215629_s_at	215629_s_at	39248_at	AQP3
		224823_at	MYLK	212550_at	STAT5B	225332_at	OIP5-AS1					224714_at	MKI67IP	209567_at	RRS1	215729_s_at	VGLL1	44783_s_at	HEY1
		224989_at	224989_at	212554_at	CAP2	225435_at	SSR1					224833_at	ETS1	209569_x_at	NSG1	215767_at	ZNF804A	59697_at	RAB15
		224990_at	SMIM14	212566_at	MAP4	225458_at	PP7080					224909_s_at	PREX1	209570_s_at	NSG1	215867_x_at	CA12
		225035_x_at	225035_x_at	212605_s_at	212605_s_at	225491_at	SLC1A2					224925_at	PREX1	209596_at	MXRA5	216074_x_at	WWC1
		225048_at	PHF10	212608_s_at	212608_s_at	225493_at	CCNT1					224928_at	SETD7	209607_x_at	209607_x_at	216096_s_at	NRXN1
		225120_at	PURB	212651_at	RHOBTB1	225507_at	PNISR					224976_at	NFIA	209619_at	CD74	216248_s_at	NR4A2
		225191_at	CIRBP	212653_s_at	EHBP1	225731_at	ANKRD50					225000_at	PRKAR2A	209625_at	PIGH	216336_x_at	MT1E
		225303_at	KIRREL	212684_at	ZNF3	225735_at	ANKRD50					225081_s_at	CDCA7L	209627_s_at	OSBPL3	216370_s_at	TKTL1
		225346_at	MTERFD3	212758_s_at	ZEB1	225740_x_at	MDM4					225239_at	225239_at	209631_s_at	GPR37	216504_s_at	SLC39A8
		225417_at	EPC1	212783_at	RBBP6	225742_at	MDM4					225252_at	SRXN1	209652_s_at	PGF	216568_x_at	216568_x_at
		225511_at	GPRC5B	212806_at	PRUNE2	225768_at	NR1D2					225291_at	PNPT1	209683_at	FAM49A	216615_s_at	HTR3A
		225525_at	KIAA1671	212851_at	DCUN1D4	225786_at	HNRNPU-AS1					225342_at	225342_at	209693_at	ASTN2	216840_s_at	LAMA2
		225548_at	SHROOM3	212853_at	DCUN1D4	225834_at	225834_at					225381_at	MIR100HG	209699_x_at	AKR1C2	216870_x_at	DLEU2
		225627_s_at	CACHD1	212855_at	DCUN1D4	225855_at	EPB41L5					225399_at	TSEN15	209722_s_at	SERPINB9	216899_s_at	SKAP2
		225674_at	BCAP29	212875_s_at	C2CD2	225856_at	CLOCK					225541_at	RPL22L1	209723_at	SERPINB9	216905_s_at	ST14
		225679_at	NAA30	212876_at	B4GALT4	225919_s_at	C9orf72					225647_s_at	CTSC	209755_at	NMNAT2	216962_at	RPAIN
		225690_at	CDK12	212897_at	CDK19	226034_at	DUSP4					225662_at	ZAK	209762_x_at	SP110	216979_at	NR4A3
		225706_at	GLCCI1	212978_at	LRRC8B	226109_at	C21orf91					225665_at	ZAK	209772_s_at	CD24	217110_s_at	MUC4
		225784_s_at	ZC4H2	212982_at	ZDHHC17	226110_at	PTAR1					225746_at	RAB11FIP4	209791_at	PADI2	217165_x_at	MT1F
		225806_at	AJUBA	212997_s_at	TLK2	226112_at	SGCB					225750_at	ERO1L	209836_x_at	209836_x_at	217168_s_at	HERPUD1
		225807_at	AJUBA	213010_at	PRKCDBP	226134_s_at	226134_s_at					225777_at	SAPCD2	209839_at	DNM3	217226_s_at	SFXN3
		225837_at	RHNO1	213018_at	GATAD1	226150_at	PPAPDC1B					225925_s_at	USP48	209869_at	ADRA2A	217230_at	EZR
		225838_at	EPC2	213074_at	PHIP	226158_at	KLHL24					225943_at	NLN	209875_s_at	SPP1	217234_s_at	EZR
		225864_at	FAM84B	213078_x_at	LPCAT4	226310_at	RICTOR					225944_at	NLN	209897_s_at	SLIT2	217457_s_at	RAP1GDS1
		225893_at	RC3H1	213089_at	LOC100272216	226316_at	RBM26					225972_at	TMEM64	209904_at	TNNC1	217561_at	CALCA
		225921_at	NIN	213145_at	FBXL14	226317_at	PPP4R2					225974_at	TMEM64	209921_at	SLC7A11	217590_s_at	TRPA1
		225975_at	PCDH18	213156_at	213156_at	226322_at	TMTC1					226009_at	DPCD	209953_s_at	CDC37	217707_x_at	SMARCA2
		226037_s_at	TAF9B	213157_s_at	213157_s_at	226334_s_at	AHSA2					226059_at	TOMM40L	209958_s_at	BBS9	217744_s_at	PERP
		226043_at	GPSM1	213158_at	213158_at	226361_at	TMEM42					226101_at	PRKCE	209966_x_at	ESRRG	217808_s_at	MAPKAP1
		226092_at	MPP5	213161_at	213161_at	226415_at	VAT1L					226107_at	C1GALT1	209990_s_at	GABBR2	217834_s_at	SYNCRIP
		226096_at	FNDC5	213170_at	GPX7	226419_s_at	FLJ44342					226169_at	SBF2	210010_s_at	SLC25A1	217837_s_at	217837_s_at
		226097_at	FNDC5	213197_at	ASTN1	226429_at	GPALPP1					226213_at	ERBB3	210048_at	NAPG	217853_at	TNS3
		226100_at	KMT2E	213208_at	GLTSCR1L	226441_at	MAP3K2					226231_at	PAWR	210105_s_at	FYN	217904_s_at	BACE1
		226197_at	AR	213213_at	DIDO1	226483_at	TMEM68					226261_at	ZNRF2	210117_at	SPAG1	217920_at	MAN1A2
		226279_at	PRSS23	213218_at	ZSCAN26	226496_at	ZCCHC7					226301_at	SLC18B1	210136_at	MBP	217921_at	MAN1A2
		226295_at	226295_at	213224_s_at	BBIP1	226508_at	PHC3					226338_at	TMEM55A	210145_at	PLA2G4A	217999_s_at	PHLDA1
		226369_at	LOC338799	213241_at	PLXNC1	226512_at	ZMYM2					226446_at	HES6	210170_at	PDLIM3	218028_at	ELOVL1
		226380_at	PTPN21	213326_at	VAMP1	226528_at	MTX3					226452_at	PDK1	210186_s_at	FKBP1A	218109_s_at	MFSD1
		226391_at	226391_at	213353_at	ABCA5	226583_at	C12orf76					226682_at	RORA	210247_at	SYN2	218156_s_at	TSR1
		226404_at	RBM39	213359_at	HNRNPD	226587_at	226587_at					226697_at	FAM114A1	210319_x_at	MSX2	218170_at	ISOC1
		226435_at	PAPLN	213376_at	ZBTB1	226663_at	226663_at					226751_at	CNRIP1	210406_s_at	210406_s_at	218180_s_at	EPS8L2
		226444_at	226444_at	213387_at	ATAD2B	226687_at	PRPF40A					226773_at	PPM1K	210427_x_at	ANXA2	218186_at	RAB25
		226473_at	CBX2	213469_at	PGAP1	226713_at	CCDC50					226782_at	SLC25A30	210431_at	ALPPL2	218211_s_at	MLPH
		226520_at	LCOR	213499_at	CLCN2	226722_at	FAM20C					226795_at	LRCH1	210495_x_at	FN1	218217_at	SCPEP1
		226527_at	RPRD2	213551_x_at	213551_x_at	226808_at	ZNF862					226851_at	LYPLAL1	210510_s_at	NRP1	218231_at	NAGK
		226538_at	MAN2A1	213555_at	RWDD2A	226821_at	226821_at					226876_at	FAM101B	210560_at	GBX2	218248_at	FAM111A
		226541_at	FBXO30	213573_at	213573_at	226838_at	TTC32					226905_at	FAM101B	210570_x_at	MAPK9	218261_at	AP1M2
		226563_at	SMAD2	213574_s_at	213574_s_at	226847_at	FST					226913_s_at	SOX8	210580_x_at	210580_x_at	218298_s_at	C14orf159
		226577_at	PSEN1	213575_at	TRA2A	226877_at	RPL32P3					226936_at	CENPW	210592_s_at	SAT1	218342_s_at	ERMP1
		226592_at	ZNF618	213593_s_at	TRA2A	226931_at	TMTC1					226985_at	FGD5	210613_s_at	SYNGR1	218353_at	RGS5
		226644_at	MIB2	213605_s_at	LOC728093	226934_at	CPSF6					227016_at	ERICH1	210639_s_at	ATG5	218391_at	SNF8
		226669_at	USP42	213684_s_at	PDLIM5	226943_at	C12orf73					227027_at	GFPT1	210648_x_at	SNX3	218407_x_at	NENF
		226719_at	DERL2	213698_at	213698_at	226962_at	ZBTB41					227034_at	SOWAHC	210657_s_at	SEPT4	218435_at	DNAJC15
		226723_at	CCDC23	213721_at	SOX2	226975_at	RNPC3					227062_at	227062_at	210732_s_at	LGALS8	218451_at	CDCP1
		226764_at	ZNF827	213722_at	SOX2	227044_at	227044_at					227068_at	PGK1	210762_s_at	DLC1	218500_at	THEM6
		226781_at	C7orf55	213743_at	CCNT2	227074_at	LOC100131564					227084_at	DTNA	210793_s_at	NUP98	218501_at	ARHGEF3
		226820_at	ZNF362	213775_x_at	ZNF638	227192_at	PRRT2					227139_s_at	HPS3	210827_s_at	ELF3	218510_x_at	FAM134B
		226840_at	H2AFY	213776_at	LOC157562	227213_at	ADAT2					227148_at	PLEKHH2	210835_s_at	CTBP2	218516_s_at	IMPAD1
		226846_at	PHYHD1	213803_at	213803_at	227222_at	FBXO10					227182_at	SUSD3	210868_s_at	ELOVL6	218532_s_at	FAM134B
		226865_at	226865_at	213852_at	213852_at	227270_at	FAM200B					227210_at	SFMBT2	210876_at	ANXA2P1	218546_at	C1orf115
		226884_at	LRRN1	213916_at	213916_at	227368_at	227368_at					227221_at	ZMAT3	210879_s_at	RAB11FIP5	218559_s_at	MAFB
		226956_at	MTMR3	213939_s_at	RUFY3	227383_at	227383_at					227386_s_at	227386_s_at	210959_s_at	SRD5A1	218627_at	DRAM1
		226981_at	KMT2A	213998_s_at	DDX17	227384_s_at	227384_s_at					227452_at	LINC00673	210978_s_at	TAGLN2	218632_at	HECTD3
		227019_at	C1orf226	214012_at	ERAP1	227405_s_at	FZD8					227481_at	CNKSR3	211028_s_at	KHK	218640_s_at	PLEKHF2
		227052_at	227052_at	214028_x_at	TDRD3	227407_at	TAPT1					227526_at	CDON	211075_s_at	CD47	218666_s_at	STX17
		227223_at	RBM39	214048_at	MBD4	227449_at	EPHA4					227534_at	AAED1	211105_s_at	NFATC1	218668_s_at	RAP2C
		227243_s_at	EBF3	214058_at	MYCL	227454_at	TAOK1					227550_at	GFRA1	211139_s_at	NAB1	218669_at	RAP2C
		227276_at	PLXDC2	214060_at	214060_at	227504_s_at	227504_s_at					227612_at	ELAVL3	211143_x_at	NR4A1	218705_s_at	SNX24
		227289_at	PCDH17	214094_at	FUBP1	227505_at	227505_at					227641_at	FBXL16	211241_at	ANXA2P3	218718_at	PDGFC
		227307_at	TSPAN18	214098_at	KIAA1107	227531_at	CLOCK					227657_at	RNF150	211323_s_at	ITPR1	218792_s_at	BSPRY
		227361_at	HS3ST3B1	214121_x_at	PDLIM7	227533_at	227533_at					227678_at	XRCC6BP1	211385_x_at	SULT1A2	218802_at	CCDC109B
		227408_s_at	SNX25	214163_at	HSPB11	227548_at	ORMDL1					227690_at	GABRB3	211423_s_at	SC5D	218816_at	LRRC1
		227478_at	SETBP1	214177_s_at	PBXIP1	227576_at	227576_at					227733_at	TMEM63C	211474_s_at	SERPINB6	218865_at	MARC1
		227492_at	227492_at	214190_x_at	GGA2	227585_at	ATAD1					227817_at	PRKCB	211518_s_at	BMP4	218888_s_at	NETO2
		227494_at	227494_at	214197_s_at	SETDB1	227605_at	AIMP1					227862_at	TRNP1	211555_s_at	GUCY1B3	218928_s_at	SLC37A1
		227496_at	227496_at	214239_x_at	214239_x_at	227636_at	THAP5					227944_at	PTPN3	211569_s_at	HADH	218931_at	RAB17
		227525_at	GLCCI1	214251_s_at	NUMA1	227663_at	227663_at					227984_at	LMF1	211653_x_at	AKR1C2	218960_at	TMPRSS4
		227529_s_at	AKAP12	214290_s_at	214290_s_at	227696_at	EXOSC6					228007_at	CEP85L	211654_x_at	HLA-DQB1	219015_s_at	ALG13
		227530_at	AKAP12	214318_s_at	FRY	227713_at	KATNAL1					228010_at	PPP2R2C	211656_x_at	HLA-DQB1	219017_at	ETNK1
		227542_at	SOCS6	214319_at	FRY	227728_at	PPM1A					228053_s_at	TOMM5	211671_s_at	NR3C1	219026_s_at	RASAL2
		227575_s_at	NRDE2	214323_s_at	UPF3A	227729_at	227729_at					228073_at	NANP	211682_x_at	UGT2B28	219032_x_at	OPN3
		227603_at	227603_at	214373_at	214373_at	227754_at	227754_at					228084_at	PLA2G12A	211719_x_at	FN1	219049_at	CSGALNACT1
		227610_at	TSPAN11	214500_at	H2AFY	227759_at	PCSK9					228107_at	LOC100127983	211749_s_at	VAMP3	219077_s_at	WWOX
		227618_at	227618_at	214633_at	SOX3	227809_at	ZC3H6					228113_at	RAB37	211751_at	211751_at	219191_s_at	BIN2
		227622_at	PCF11	214670_at	ZKSCAN1	227884_at	TAF15					228168_at	ATP5G3	211766_s_at	PNLIPRP2	219209_at	IFIH1
		227658_s_at	PLEKHA3	214745_at	PLCH1	227891_s_at	TAF15					228224_at	PRELP	211776_s_at	EPB41L3	219211_at	USP18
		227745_at	RNF139-AS1	214746_s_at	ZNF467	227948_at	FGD4					228228_at	DACT3	211844_s_at	NRP2	219230_at	TMEM100
		227762_at	227762_at	214757_at	PMS2L2	227963_at	227963_at					228293_at	DEPDC7	211864_s_at	MYOF	219247_s_at	ZDHHC14
		227798_at	SMAD1	214774_x_at	TOX3	227980_at	ZNF322					228315_at	ZMAT3	211941_s_at	PEBP1	219267_at	GLTP
		227812_at	TNFRSF19	214815_at	TRIM33	227982_at	SEPSECS					228434_at	BTNL9	211960_s_at	RAB7A	219287_at	KCNMB4
		227839_at	MBD5	214894_x_at	MACF1	228029_at	ZNF721					228441_s_at	228441_s_at	211963_s_at	ARPC5	219316_s_at	FLVCR2
		227870_at	IGDCC4	214917_at	PRKAA1	228086_at	STK33					228461_at	SH3RF3	212053_at	PDXDC1	219334_s_at	NABP1
		227873_at	TXNDC15	214918_at	HNRNPM	228141_at	GPX8					228565_at	KIAA1804	212094_at	PEG10	219352_at	HERC6
		227904_at	AZI2	214985_at	EXT1	228157_at	ZNF207					228575_at	IL20RB	212110_at	SLC39A14	219367_s_at	NRP2
		227925_at	ST3GAL4-AS1	214996_at	214996_at	228174_at	SCAI					228750_at	228750_at	212117_at	212117_at	219370_at	RPRM
		227930_at	AGO4	214997_at	SCAI	228183_s_at	RPAIN					228754_at	SLC6A6	212119_at	RHOQ	219388_at	GRHL2
		227943_at	227943_at	215012_at	ZNF451	228216_at	228216_at					228780_at	POU3F3	212122_at	RHOQ	219389_at	SUSD4
		227947_at	PHACTR2	215043_s_at	215043_s_at	228218_at	LSAMP					228782_at	SCGB3A2	212188_at	KCTD12	219395_at	ESRP2
		227995_at	227995_at	215057_at	LINC00894	228295_at	WDR59					228797_at	NLN	212192_at	KCTD12	219403_s_at	HPSE
		228005_at	ZXDB	215062_at	215062_at	228308_at	FKBP11					228802_at	RBPMS2	212223_at	IDS	219428_s_at	PXMP4
		228017_s_at	NKAIN4	215083_at	215083_at	228326_at	WDR27					228882_at	TUB	212235_at	PLXND1	219450_at	C4orf19
		228018_at	NKAIN4	215102_at	DPY19L1P1	228329_at	DAB1					228952_at	ENPP1	212249_at	PIK3R1	219484_at	HCFC2
		228030_at	RBM6	215108_x_at	TOX3	228333_at	ZEB2					229004_at	ADAMTS15	212295_s_at	SLC7A1	219501_at	ENOX1
		228032_s_at	DENND1B	215109_at	RC3H1	228345_at	CHIC1					229012_at	C9orf24	212311_at	SEL1L3	219563_at	LINC00341
		228054_at	TMEM44	215128_at	215128_at	228354_at	MORN4					229024_at	229024_at	212333_at	FAM98A	219570_at	KIF16B
		228057_at	DDIT4L	215164_at	215164_at	228380_at	SENP2					229065_at	SLC35F3	212345_s_at	CREB3L2	219735_s_at	TFCP2L1
		228083_at	CACNA2D4	215169_at	215169_at	228386_s_at	DDX59					229139_at	JPH1	212392_s_at	212392_s_at	219737_s_at	PCDH9
		228105_at	228105_at	215175_at	PCNX	228393_s_at	ZNF302					229167_at	PURA	212411_at	IMP4	219743_at	HEY2
		228210_at	NXPH3	215198_s_at	CALD1	228395_at	228395_at					229168_at	COL23A1	212419_at	ZCCHC24	219824_at	SLC13A4
		228275_at	LINC00888	215204_at	215204_at	228415_at	AP1S2					229218_at	COL1A2	212420_at	ELF1	219855_at	NUDT11
		228296_at	YPEL1	215212_at	215212_at	228418_at	EXOC5					229241_at	LDHD	212421_at	KIAA0930	219898_at	GPR85
		228302_x_at	CAMK2N1	215213_at	NUP54	228448_at	MAP6					229354_at	AHRR	212445_s_at	NEDD4L	219904_at	ZSCAN5A
		228316_at	CLHC1	215222_x_at	MACF1	228465_at	228465_at					229498_at	MBNL3	212456_at	CLUH	219915_s_at	SLC16A10
		228342_s_at	ALPK3	215259_s_at	CADM4	228483_s_at	TAF9B					229691_at	ZBTB42	212460_at	SPTSSA	219932_at	SLC27A6
		228364_at	ZNF784	215260_s_at	TCF3	228493_at	228493_at					229759_s_at	VEPH1	212464_s_at	FN1	219937_at	TRHDE
		228407_at	SCUBE3	215268_at	KIAA0754	228539_at	228539_at					229818_at	SVOP	212486_s_at	FYN	219951_s_at	DZANK1
		228412_at	LOC643072	215284_at	215284_at	228571_at	228571_at					229958_at	CLN8	212489_at	COL5A1	219959_at	MOCOS
		228458_at	C6orf226	215294_s_at	SMARCA1	228603_at	ACTR3					229963_at	BEX5	212501_at	CEBPB	219977_at	AIPL1
		228506_at	NSMCE4A	215297_at	LOC441204	228623_at	228623_at					230003_at	230003_at	212510_at	GPD1L	219995_s_at	ZNF750
		228560_at	228560_at	215301_at	SYCE1L	228643_at	RAB30-AS1					230030_at	HS6ST2	212527_at	DESI1	220030_at	STYK1
		228562_at	ZBTB10	215307_at	ZNF529	228655_at	228655_at					230060_at	CDCA7	212538_at	DOCK9	220102_at	FOXL2
		228627_at	TLK2	215314_at	215314_at	228693_at	CCDC50					230102_at	ETV5	212543_at	AIM1	220104_at	ZC3HAV1
		228652_at	ZNF776	215316_at	215316_at	228722_at	PRMT2					230110_at	MCOLN2	212552_at	HPCAL1	220120_s_at	EPB41L4A
		228719_at	ZSWIM7	215349_at	BTBD18	228778_at	MCPH1					230179_at	LOC285812	212563_at	BOP1	220150_s_at	FAM184A
		228720_at	SORCS2	215387_x_at	215387_x_at	228792_at	228792_at					230184_at	LOC100506421	212614_at	ARID5B	220182_at	SLC25A23
		228751_at	CLK4	215398_at	215398_at	228816_at	228816_at					230195_at	LOC100131138	212681_at	EPB41L3	220197_at	ATP6V0A4
		228765_at	GTF2IRD2	215433_at	DPY19L1	228859_at	C4orf21					230257_s_at	TSEN15	212683_at	SLC25A44	220225_at	IRX4
		228793_at	JMJD1C	215436_at	HSDL2	228906_at	TET1					230263_s_at	DOCK5	212702_s_at	BICD2	220289_s_at	AIM1L
		228826_at	BZRAP1-AS1	215455_at	TIMELESS	228968_at	ZNF449					230269_at	230269_at	212741_at	MAOA	220318_at	EPN3
		228828_at	BZRAP1-AS1	215483_at	AKAP9	228998_at	TNRC6B					230278_at	230278_at	212766_s_at	ISG20L2	220324_at	LINC00472
		228854_at	228854_at	215505_s_at	STRN3	229053_at	SYT17					230280_at	TRIM9	212800_at	STX6	220327_at	VGLL3
		228863_at	PCDH17	215515_at	215515_at	229078_s_at	GPALPP1					230349_at	XKRX	212816_s_at	CBS	220331_at	CYP46A1
		228885_at	MAMDC2	215523_at	ZNF391	229090_at	ZEB1-AS1					230383_x_at	230383_x_at	212830_at	MEGF9	220413_at	SLC39A2
		228914_at	228914_at	215545_at	215545_at	229141_at	229141_at					230419_at	FLJ37644	212843_at	NCAM1	220419_s_at	USP25
		228958_at	228958_at	215555_at	215555_at	229200_at	229200_at					230423_at	230423_at	212865_s_at	COL14A1	220431_at	TMPRSS11E
		228980_at	228980_at	215563_s_at	MST1L	229227_at	DICER1-AS1					230560_at	STXBP6	212922_s_at	SMYD2	220432_s_at	CYP39A1
		228996_at	RC3H1	215567_at	FCF1	229244_at	LSAMP					230563_at	RASGEF1A	212923_s_at	PXDC1	220484_at	MCOLN3
		229001_at	PPP1R3E	215577_at	215577_at	229246_at	FLJ44342					230630_at	230630_at	212970_at	APBB2	220494_s_at	220494_s_at
		229019_at	ZNF385B	215586_at	215586_at	229266_at	SHISA6					230633_at	TMEM102	212971_at	CARS	220520_s_at	NUP62CL
		229022_at	ZFX	215592_at	215592_at	229272_at	FNBP4					230645_at	FRMD3	212973_at	RPIA	220595_at	PDZRN4
		229071_at	C17orf100	215611_at	TCF12	229287_at	PCNX					230746_s_at	230746_s_at	212977_at	ACKR3	220615_s_at	FAR2
		229080_at	COL26A1	215766_at	GSTA1	229315_at	229315_at					230765_at	KIAA1239	212985_at	APBB2	220624_s_at	ELF5
		229085_at	LRRC3B	215768_at	215768_at	229317_at	KPNA5					230807_at	CCDC151	212990_at	SYNJ1	220625_s_at	ELF5
		229086_at	C1orf213	215786_at	215786_at	229325_at	ZZZ3					230864_at	NIM1	212992_at	AHNAK2	220671_at	CCRN4L
		229116_at	CNKSR2	215802_at	215802_at	229366_at	229366_at					230937_at	LOC285835	212998_x_at	HLA-DQB1	220679_s_at	CDH7
		229189_s_at	LOC100507376	215898_at	TTLL5	229417_at	229417_at					230991_at	230991_at	212999_x_at	HLA-DQB1	220736_at	SLC19A3
		229190_at	LOC100507376	215900_at	215900_at	229429_x_at	229429_x_at					231018_at	PALM3	213030_s_at	PLXNA2	220800_s_at	TMOD3
		229211_at	DUSP28	215985_at	215985_at	229434_at	229434_at					231042_s_at	231042_s_at	213036_x_at	ATP2A3	220974_x_at	SFXN3
		229261_at	229261_at	216078_at	216078_at	229464_at	MYEF2					231050_at	HRASLS5	213050_at	COBL	221008_s_at	ETNPPL
		229311_at	GKAP1	216113_at	ABI2	229515_at	PAWR					231079_at	231079_at	213051_at	ZC3HAV1	221103_s_at	WDR52
		229351_at	229351_at	216115_at	NF1	229528_at	SBNO1					231121_at	HPS3	213075_at	OLFML2A	221127_s_at	DKK3
		229380_at	ILDR2	216147_at	216147_at	229549_at	CALU					231192_at	LPAR3	213113_s_at	SLC43A3	221210_s_at	NPL
		229411_at	PNCK	216176_at	HCRP1	229569_at	229569_at					231380_at	C8orf34	213115_at	ATG4A	221217_s_at	RBFOX1
		229441_at	PRSS23	216197_at	ATF7IP	229572_at	ATP6V0A2					231381_at	ESRG	213125_at	OLFML2B	221384_at	UCP1
		229468_at	229468_at	216278_at	216278_at	229679_at	229679_at					231517_at	ZYG11A	213154_s_at	BICD2	221474_at	MYL12B
		229593_at	H2AFY	216623_x_at	TOX3	229765_at	ZNF207					231798_at	NOG	213183_s_at	CDKN1C	221530_s_at	BHLHE41
		229596_at	AMDHD1	216682_s_at	SUPT20H	229782_at	RMST					231925_at	231925_at	213188_s_at	MINA	221541_at	CRISPLD2
		229609_at	NUTM2A-AS1	216705_s_at	ADA	229787_s_at	OGT					231928_at	HES2	213189_at	MINA	221606_s_at	HMGN5
		229623_at	229623_at	216918_s_at	DST	229793_at	ASAH2B					231982_at	C19orf77	213273_at	TENM4	221609_s_at	WNT6
		229642_at	ARHGEF7	216933_x_at	APC	229815_at	TMEM161B-AS1					232116_at	GRHL3	213285_at	TMEM30B	221676_s_at	CORO1C
		229645_at	FAM69C	216997_x_at	TLE4	229822_at	229822_at					232127_at	CLCN5	213302_at	PFAS	221696_s_at	STYK1
		229660_at	SPATA33	217152_at	217152_at	229858_at	229858_at					232151_at	MACC1	213316_at	KIAA1462	221737_at	GNA12
		229661_at	SALL4	217164_at	217164_at	229861_at	RFFL					232166_at	KIAA1377	213333_at	MDH2	221771_s_at	MPHOSPH8
		229687_s_at	PRDM11	217368_at	217368_at	229869_at	229869_at					232181_at	PPARGC1B	213373_s_at	CASP8	221779_at	MICALL1
		229695_at	229695_at	217498_at	217498_at	229871_at	SAMD4B					232203_at	NKD1	213375_s_at	N4BP2L1	221802_s_at	KIAA1598
		229770_at	GLT1D1	217519_at	217519_at	229872_s_at	229872_s_at					232235_at	DSEL	213385_at	CHN2	221823_at	C5orf30
		229795_at	229795_at	217554_at	217554_at	229874_x_at	229874_x_at					232541_at	232541_at	213388_at	213388_at	221841_s_at	KLF4
		229817_at	ZNF608	217593_at	ZSCAN18	229876_at	PHKA1					232760_at	TEX15	213397_x_at	213397_x_at	221881_s_at	CLIC4
		229866_at	STK32A	217608_at	SREK1IP1	229879_at	229879_at					232827_at	232827_at	213424_at	KIAA0895	221903_s_at	CYLD
		229898_at	SNX33	217617_at	217617_at	229891_x_at	GPALPP1					232958_at	232958_at	213435_at	SATB2	221959_at	FAM110B
		229914_at	FLJ38717	217649_at	ZFAND5	229903_x_at	RNPC3					233030_at	PNPLA3	213436_at	CNR1	222033_s_at	FLT1
		229943_at	TRIM13	217681_at	WNT7B	229930_at	229930_at					233050_at	233050_at	213446_s_at	IQGAP1	222262_s_at	ETNK1
		230045_at	CNTN2	217729_s_at	AES	229984_at	DTWD1					233606_at	233606_at	213503_x_at	ANXA2	222288_at	222288_at
		230076_at	PITPNM3	217765_at	NRBP1	230014_at	230014_at					233675_s_at	TPTE2P6	213523_at	CCNE1	222392_x_at	PERP
		230088_at	230088_at	217797_at	UFC1	230064_at	230064_at					233934_at	LOC349160	213533_at	NSG1	222436_s_at	222436_s_at
		230147_at	F2RL2	217805_at	ILF3	230069_at	SFXN1					234513_at	ELOVL3	213545_x_at	SNX3	222437_s_at	222437_s_at
		230148_at	AHSA2	217856_at	RBM8A	230072_at	TBC1D15					234970_at	TC2N	213603_s_at	RAC2	222442_s_at	ARL8B
		230192_at	TRIM13	218127_at	NFYB	230077_at	230077_at					234976_x_at	234976_x_at	213622_at	COL9A2	222463_s_at	BACE1
		230224_at	ZCCHC18	218129_s_at	NFYB	230149_at	230149_at					234987_at	SAMHD1	213664_at	SLC1A1	222537_s_at	CDC42SE1
		230248_x_at	230248_x_at	218159_at	DDRGK1	230154_at	WAC					234989_at	234989_at	213745_at	ATRNL1	222573_s_at	SAV1
		230290_at	SCUBE3	218166_s_at	RSF1	230209_at	ZXDC					235061_at	PPM1K	213753_x_at	EIF5A	222603_at	ERMP1
		230296_at	C16orf52	218179_s_at	TRAPPC11	230235_at	MCTS1					235129_at	PPP1R1A	213906_at	MYBL1	222631_at	222631_at
		230337_at	SOS1	218218_at	APPL2	230332_at	ZCCHC7					235147_at	235147_at	213929_at	EXPH5	222654_at	IMPAD1
		230444_at	PDE7A	218234_at	ING4	230360_at	GLDN					235174_s_at	LINC01003	213933_at	PTGER3	222699_s_at	PLEKHF2
		230469_at	RTKN2	218263_s_at	ZBED5	230389_at	FNBP1					235343_at	VASH2	213943_at	TWIST1	222716_s_at	SNX24
		230482_at	ST6GALNAC5	218310_at	218310_at	230403_at	RFX3					235518_at	SLC8A1	213988_s_at	SAT1	222719_s_at	PDGFC
		230505_at	LOC145474	218312_s_at	ZSCAN18	230449_x_at	230449_x_at					235529_x_at	SAMHD1	213989_x_at	SETD4	222746_s_at	BSPRY
		230556_at	IMMP1L	218370_s_at	S100PBP	230472_at	IRX1					235567_at	RORA	214040_s_at	GSN	222764_at	ASRGL1
		230589_at	TRAF3IP2-AS1	218412_s_at	GTF2IRD1	230494_at	SLC20A1					235599_at	LOC339535	214096_s_at	SHMT2	222808_at	ALG13
		230597_at	SLC7A3	218453_s_at	TMEM242	230534_at	ZNF678					235652_at	235652_at	214099_s_at	214099_s_at	222857_s_at	KCNMB4
		230654_at	230654_at	218490_s_at	ZNF302	230559_x_at	FGD4					235781_at	CACNA1B	214106_s_at	GMDS	222877_at	222877_at
		230663_at	230663_at	218515_at	PAXBP1	230703_at	230703_at					235888_at	GUSBP1	214111_at	OPCML	222889_at	DCLRE1B
		230668_at	NKAIN4	218531_at	TMEM134	230764_at	230764_at					235956_at	KIAA1377	214119_s_at	FKBP1A	222939_s_at	SLC16A10
		230681_at	TBRG1	218678_at	NES	230773_at	ZNF385D					235964_x_at	SAMHD1	214120_at	RFPL1S	223019_at	FAM129B
		230683_at	230683_at	218683_at	PTBP2	230782_at	SORD					236045_x_at	236045_x_at	214129_at	214129_at	223044_at	SLC40A1
		230752_at	230752_at	218694_at	ARMCX1	230818_at	230818_at					236048_at	LHFPL1	214130_s_at	214130_s_at	223063_at	C1orf198
		230776_at	RNF157-AS1	218748_s_at	EXOC5	230896_at	BEND4					236115_at	HTR7P1	214149_s_at	214149_s_at	223093_at	ANKH
		230785_at	230785_at	218755_at	KIF20A	230942_at	CMTM5					236277_at	236277_at	214157_at	GNAS	223103_at	STARD10
		230787_at	230787_at	218769_s_at	ANKRA2	230963_at	EMX2OS					236325_at	KIAA1377	214162_at	LOC284244	223136_at	AIG1
		230809_at	230809_at	218819_at	INTS6	231012_at	SLC35G1					236359_at	SCN4B	214180_at	MAN1C1	223148_at	PIGS
		230815_at	LOC389765	218824_at	PNMAL1	231061_at	231061_at					236391_at	236391_at	214183_s_at	TKTL1	223167_s_at	USP25
		230839_at	PRMT8	218972_at	TTC17	231088_at	MORF4L2-AS1					236395_at	236395_at	214243_s_at	214243_s_at	223171_at	DYM
		230863_at	LRP2	218994_s_at	STAG3L4	231110_at	231110_at					236529_at	SRCRB4D	214247_s_at	DKK3	223213_s_at	ZHX1
		230865_at	LIX1	219012_s_at	C11orf30	231131_at	FAM133A					236538_at	GRIA2	214265_at	ITGA8	223214_s_at	ZHX1
		230889_at	LOC645321	219029_at	C5orf28	231162_at	CLDND2					236575_at	ARHGEF26-AS1	214295_at	KIAA0485	223232_s_at	CGN
		230892_at	230892_at	219043_s_at	219043_s_at	231199_at	231199_at					236600_at	SPG20	214321_at	NOV	223235_s_at	SMOC2
		230928_at	230928_at	219113_x_at	HSD17B14	231207_at	231207_at					236741_at	WDR72	214369_s_at	RASGRP2	223242_s_at	MFSD11
		230932_at	230932_at	219174_at	IFT74	231208_at	231208_at					237192_at	237192_at	214429_at	MTMR6	223274_at	TCF19
		230939_at	LOC100996457	219197_s_at	SCUBE2	231235_at	NKTR					237193_s_at	237193_s_at	214437_s_at	SHMT2	223283_s_at	TSHZ1
		230948_at	230948_at	219237_s_at	DNAJB14	231252_at	KANSL1L					237215_s_at	TFRC	214440_at	NAT1	223287_s_at	FOXP1
		230988_at	ADD2	219240_s_at	C10orf88	231312_at	231312_at					237248_at	PDE11A	214459_x_at	HLA-C	223319_at	GPHN
		231039_at	NAA30	219301_s_at	CNTNAP2	231466_at	FAM71F1					237275_at	LINC00458	214521_at	HES2	223340_at	ATL1
		231067_s_at	AKAP12	219302_s_at	CNTNAP2	231470_at	LINC00664					237911_at	237911_at	214531_s_at	SNX1	223405_at	NPL
		231090_s_at	ARID2	219306_at	KIF15	231495_at	231495_at					238123_at	GABRQ	214581_x_at	TNFRSF21	223475_at	CRISPLD1
		231118_at	ANKRD35	219342_at	CASD1	231502_at	231502_at					238419_at	PHLDB2	214591_at	KLHL4	223503_at	TMEM163
		231230_at	KCNK10	219348_at	USE1	231540_at	LOC100130691					238430_x_at	SLFN5	214608_s_at	EYA1	223510_at	NRP2
		231262_at	231262_at	219381_at	C5orf42	231569_at	TMEM31					238440_at	CLYBL	214632_at	NRP2	223523_at	TMEM108
		231292_at	EID3	219383_at	PRR5L	231731_at	OTX2					238453_at	FGFBP3	214636_at	CALCB	223556_at	HELLS
		231471_at	231471_at	219423_x_at	TNFRSF25	231825_x_at	ATF7IP					238506_at	LRRC58	214660_at	ITGA1	223618_at	FMN2
		231515_at	231515_at	219464_at	CA14	231836_at	HKR1					238600_at	JAKMIP1	214681_at	GK	223659_at	TMPRSS13
		231726_at	PCDHB14	219494_at	219494_at	231848_x_at	ZNF207					238613_at	ZAK	214719_at	SLC46A3	223694_at	TRIM7
		231789_at	PCDHB15	219505_at	CECR1	231854_at	PIK3CA					238663_x_at	GRIA4	214734_at	EXPH5	223737_x_at	CHST9
		231795_at	231795_at	219506_at	C1orf54	231860_at	BRWD1					238694_at	DGKE	214769_at	CLCN4	223738_s_at	PGM2
		231851_at	RAVER2	219567_s_at	EXO5	231864_at	ZNF33A					238815_at	LRRTM1	214787_at	DENND4A	223822_at	SUSD4
		231868_at	HOMEZ	219631_at	LRP12	231878_at	PAGR1					238966_at	CELF4	214791_at	SP140L	223825_at	KIAA1432
		231898_x_at	SOX2-OT	219635_at	ZNF606	231952_at	231952_at					238996_x_at	ALDOA	214811_at	RIMBP2	223894_s_at	AKTIP
		231950_at	231950_at	219644_at	CCDC41	231960_at	BRWD1					239092_at	ITGA8	214823_at	ZNF204P	223895_s_at	EPN3
		231966_at	PPP1R9A	219680_at	NLRX1	231964_at	BICD1					239118_at	KCNA2	214830_at	SLC38A6	223908_at	HDAC8
		232051_at	CCDC102A	219683_at	FZD3	231967_at	PHF20L1					239205_s_at	239205_s_at	214913_at	ADAMTS3	224030_s_at	FAM115A
		232099_at	PCDHB16	219685_at	TMEM35	231978_at	TPCN2					239206_at	CR1L	214930_at	SLITRK5	224099_at	KCNH7
		232148_at	NSMAF	219871_at	FLJ13197	231979_at	231979_at					239237_at	TRG-AS1	214967_at	214967_at	224164_at	TPM3
		232149_s_at	NSMAF	219910_at	FICD	232004_at	HNRNPR					239285_at	239285_at	214974_x_at	CXCL5	224169_at	NPFFR2
		232242_at	PTPRG-AS1	219924_s_at	ZMYM6	232020_at	SMURF2					239292_at	239292_at	215101_s_at	CXCL5	224180_x_at	WDPCP
		232256_s_at	LINC00997	219961_s_at	PLK1S1	232038_at	TBC1D32					239352_at	SLC6A15	215210_s_at	DLST	224209_s_at	GDA
		232303_at	ZNF608	220087_at	BCMO1	232061_at	SDK2					239572_at	GJA3	215253_s_at	RCAN1	224210_s_at	PXMP4
		232312_at	PPP6R3	220223_at	ATAD5	232071_at	MRPL19					239675_at	LINC00900	215299_x_at	SULT1A1	224301_x_at	H2AFJ
		232344_at	232344_at	220253_s_at	LRP12	232105_at	232105_at					239781_at	LINC00545	215323_at	LUZP2	224323_s_at	MRO
		232406_at	232406_at	220254_at	LRP12	232156_at	232156_at					239835_at	KBTBD8	215407_s_at	ASTN2	224335_s_at	BACE1
		232453_at	232453_at	220287_at	ADAMTS9	232194_at	METTL4					239913_at	SLC10A4	215411_s_at	TRAF3IP2	224392_s_at	OPN3
		232500_at	RALGAPA2	220326_s_at	ARHGEF40	232207_at	GUSBP4					239975_at	HLA-DPB2	215498_s_at	MAP2K3	224400_s_at	CHST9
		232527_at	PSMD6-AS2	220390_at	AGBL2	232216_at	YME1L1					240037_at	ITPRIPL1	215499_at	MAP2K3	224445_s_at	ZFYVE21
		232583_at	232583_at	220410_s_at	CAMSAP1	232280_at	SLC25A29					240152_at	240152_at	215522_at	SORCS3	224469_s_at	INF2
		232595_at	232595_at	220458_at	220458_at	232293_at	LCORL					240254_at	240254_at	215571_at	215571_at	224572_s_at	IRF2BP2
		232611_at	GOLGA2P5	220495_s_at	TXNDC15	232323_s_at	TTC17					240395_at	LOC100128727	215594_at	ERV9-1	224595_at	SLC44A1
		232613_at	PBRM1	220497_at	ZNF214	232347_x_at	232347_x_at					240681_at	240681_at	215707_s_at	PRNP	224596_at	SLC44A1
		232679_at	232679_at	220509_at	RBM26	232351_at	232351_at					240865_at	240865_at	215723_s_at	PLD1	224604_at	C4orf3
		232754_at	232754_at	220521_s_at	ATG16L1	232376_at	PCCA					241436_at	SCNN1G	215726_s_at	CYB5A	224605_at	C4orf3
		232837_at	KIF13A	220576_at	PGAP1	232412_at	FBXL20					241698_at	RFTN2	215789_s_at	AJAP1	224606_at	KLF6
		232847_at	SALL3	220586_at	CHD9	232424_at	PRDM16					241925_x_at	SLC16A7	216033_s_at	FYN	224650_at	MAL2
		232878_at	NR2F2-AS1	220663_at	IL1RAPL1	232454_at	232454_at					241953_at	241953_at	216048_s_at	RHOBTB3	224695_at	CNOT11
		232909_s_at	232909_s_at	220702_at	TLK1	232478_at	MIR181A2HG					241986_at	BMPER	216199_s_at	MAP3K4	224699_s_at	ESYT2
		232927_at	232927_at	220728_at	220728_at	232489_at	TRMT13					242070_at	LOC728485	216202_s_at	SPTLC2	224729_s_at	ATPAF1
		232989_s_at	CCDC136	220843_s_at	DCAF13	232523_at	MEGF10					242149_at	FAM210A	216235_s_at	EDNRA	224751_at	C7orf73
		232990_at	FAM104B	220969_s_at	220969_s_at	232531_at	EMX2OS					242328_at	RAB3C	216236_s_at	216236_s_at	224752_at	C7orf73
		233115_at	233115_at	220997_s_at	DIAPH3	232576_at	232576_at					242338_at	TMEM64	216239_at	BBS9	224820_at	COX20
		233129_at	233129_at	221010_s_at	SIRT5	232606_at	ANK2					242488_at	CHRM3	216321_s_at	NR3C1	224837_at	FOXP1
		233205_at	233205_at	221012_s_at	TRIM8	232629_at	PROK2					242522_at	TCF24	216442_x_at	FN1	224838_at	FOXP1
		233222_at	233222_at	221029_s_at	WNT5B	232648_at	PSMA3					242786_at	SBF2-AS1	216554_s_at	ENO1	224839_s_at	GPT2
		233228_at	233228_at	221088_s_at	PPP1R9A	232696_at	232696_at					242824_at	242824_at	216591_s_at	SDHC	224848_at	CDK6
		233234_at	KCTD16	221143_at	RPA4	232716_at	232716_at					242871_at	PAQR5	216594_x_at	AKR1C1	224894_at	YAP1
		233241_at	PLK1S1	221234_s_at	BACH2	232759_at	232759_at					242878_at	242878_at	216944_s_at	ITPR1	224895_at	YAP1
		233263_at	233263_at	221261_x_at	221261_x_at	232784_at	232784_at					242911_at	MED13L	217057_s_at	GNAS	224937_at	PTGFRN
		233273_at	233273_at	221264_s_at	TARDBP	232794_at	LOC153682					242913_at	CLIC6	217109_at	MUC4	224952_at	TANC2
		233309_at	233309_at	221272_s_at	C1orf21	232823_at	232823_at					242935_at	SBF2	217118_s_at	KIAA0930	224987_at	C6orf89
		233323_at	233323_at	221392_at	TAS2R4	232881_at	GNAS-AS1					242959_at	242959_at	217127_at	CTH	224999_at	EGFR
		233365_at	233365_at	221428_s_at	TBL1XR1	232912_at	GPR180					243000_at	CDK6	217150_s_at	NF2	225018_at	SPIRE1
		233369_at	233369_at	221430_s_at	RNF146	232963_at	232963_at					243161_x_at	ZFP42	217287_s_at	TRPC6	225093_at	UTRN
		233436_at	MTBP	221519_at	FBXW4	232998_at	TIGD4					243366_s_at	243366_s_at	217367_s_at	ZHX3	225136_at	PLEKHA2
		233440_at	233440_at	221569_at	AHI1	233019_at	CNOT7					243432_at	CHL1-AS2	217427_s_at	HIRA	225166_at	ARHGAP18
		233540_s_at	CDK5RAP2	221593_s_at	RPL31	233083_at	MTHFD2L					243688_at	MGC45800	217437_s_at	TACC1	225176_at	LNPEP
		233609_at	PTPRK	221621_at	221621_at	233139_at	233139_at					243729_at	243729_at	217478_s_at	HLA-DMA	225186_at	RAPH1
		233611_at	233611_at	221626_at	ZNF506	233191_at	RUFY2					243999_at	SLFN5	217508_s_at	C18orf25	225188_at	RAPH1
		233614_at	233614_at	221706_s_at	USE1	233202_at	CNTNAP3					244170_at	RAB3C	217520_x_at	217520_x_at	225189_s_at	RAPH1
		233678_at	233678_at	221761_at	ADSS	233224_at	233224_at					244511_at	244511_at	217540_at	NXPE3	225245_x_at	H2AFJ
		233692_at	233692_at	221825_at	ANGEL2	233254_x_at	PTEN					244565_at	HMX2	217553_at	STEAP1B	225299_at	MYO5B
		233815_at	NAALAD2	221826_at	ANGEL2	233257_at	233257_at					31845_at	ELF4	217678_at	SLC7A11	225301_s_at	MYO5B
		233832_at	233832_at	221867_at	N4BP1	233271_at	233271_at					32541_at	PPP3CC	217691_x_at	SLC16A3	225308_s_at	TANC1
		233834_at	233834_at	221878_at	C2orf68	233280_at	233280_at					36711_at	MAFF	217728_at	S100A6	225325_at	MFSD6
		233870_at	NAV1	221901_at	KIAA1644	233314_at	233314_at					37079_at	NUS1P3	217743_s_at	TMEM30A	225344_at	NCOA7
		233972_s_at	FEZF2	221908_at	RNFT2	233327_at	UBE3D					37117_at	37117_at	217752_s_at	CNDP2	225356_at	225356_at
		233985_x_at	PPP1R9A	222125_s_at	P4HTM	233400_at	233400_at					37547_at	BBS9	217755_at	HN1	225367_at	PGM2
		234033_at	234033_at	222133_s_at	PHF20L1	233465_at	233465_at					37986_at	EPOR	217762_s_at	RAB31	225414_at	RNF149
		234081_at	234081_at	222153_at	MYEF2	233500_x_at	CLEC2D					45714_at	HCFC1R1	217763_s_at	RAB31	225436_at	ABHD17C
		234105_at	234105_at	222164_at	FGFR1	233515_at	233515_at					47550_at	LZTS1	217764_s_at	RAB31	225459_at	AMOTL1
		234157_at	234157_at	222167_at	222167_at	233700_at	233700_at					52164_at	C11orf24	217785_s_at	YKT6	225499_at	RALGAPA2
		234194_at	234194_at	222186_at	222186_at	233753_at	SCAF4					52255_s_at	COL5A3	217848_s_at	PPA1	225508_at	KIAA1468
		234260_at	234260_at	222214_at	222214_at	234032_at	234032_at					61734_at	RCN3	217858_s_at	ARMCX3	225516_at	SLC7A2
		234276_at	234276_at	222239_s_at	INTS6	234074_at	234074_at							217867_x_at	BACE2	225520_at	MTHFD1L
		234299_s_at	NIN	222276_at	METTL2B	234098_at	SOBP							217874_at	SUCLG1	225536_at	TMEM54
		234587_at	234587_at	222282_at	222282_at	234103_at	KCNT2							217911_s_at	BAG3	225545_at	EEF2K
		234588_at	234588_at	222284_at	222284_at	234224_at	234224_at							217922_at	MAN1A2	225566_at	NRP2
		234591_at	234591_at	222293_at	CADM4	234605_at	CDC14B							217933_s_at	LAP3	225579_at	PQLC3
		234632_x_at	234632_x_at	222303_at	222303_at	234676_s_at	N6AMT1							217967_s_at	FAM129A	225597_at	SLC45A4
		234871_at	GPR98	222306_at	222306_at	234759_at	234759_at							217973_at	DCXR	225604_s_at	GLIPR2
		234969_s_at	EPC1	222307_at	PDCD4-AS1	235008_at	235008_at							217977_at	MSRB1	225611_at	MAST4
		235103_at	MAN2A1	222310_at	SCAF4	235045_at	RBM7							217980_s_at	MRPL16	225622_at	PAG1
		235148_at	KRTCAP3	222311_s_at	SCAF4	235051_at	CCDC50							217986_s_at	BAZ1A	225639_at	SKAP2
		235290_at	ZNF782	222346_at	LAMA1	235064_s_at	C20orf196							217996_at	PHLDA1	225688_s_at	PHLDB2
		235301_at	KIAA1324L	222350_at	222350_at	235074_at	SPRED1							217997_at	PHLDA1	225695_at	SLC35F6
		235318_at	FBN1	222357_at	ZBTB20	235111_at	LSAMP							218024_at	MPC1	225728_at	SORBS2
		235427_at	CFLAR	222366_at	222366_at	235123_at	235123_at							218069_at	DCTPP1	225783_at	UBE2F
		235456_at	235456_at	222371_at	222371_at	235142_at	ZBTB8A							218070_s_at	GMPPA	225787_at	UBE2F
		235500_at	HNRNPC	222434_at	ENAH	235172_at	235172_at							218120_s_at	HMOX2	225794_s_at	SMDT1
		235507_at	PCMTD1	222540_s_at	RSF1	235184_at	AEBP2							218131_s_at	GATAD2A	225795_at	SMDT1
		235593_at	ZEB2	222541_at	RSF1	235189_at	NARG2							218145_at	TRIB3	225822_at	TMEM125
		235598_at	SMAD2	222580_at	ZNF644	235226_at	CDK19							218194_at	REXO2	225885_at	EEA1
		235647_at	AP4S1	222610_s_at	S100PBP	235240_at	ATXN3							218195_at	C6orf211	225911_at	NPNT
		235657_at	235657_at	222633_at	TBL1XR1	235259_at	PACRGL							218254_s_at	SAR1B	225922_at	FNIP2
		235681_at	235681_at	222656_at	UBE2W	235271_s_at	ZNF397							218292_s_at	PRKAG2	225970_at	DDHD1
		235705_at	235705_at	222664_at	KCTD15	235274_at	235274_at							218297_at	FAM188A	225971_at	DDHD1
		235796_at	235796_at	222668_at	KCTD15	235304_at	235304_at							218317_x_at	218317_x_at	225980_at	ELMSAN1
		235830_at	235830_at	222771_s_at	MYEF2	235344_at	PPM1A							218404_at	SNX10	226021_at	RDH10
		235840_at	ZKSCAN3	222790_s_at	RSBN1	235362_at	LOC729970							218408_at	TIMM10	226024_at	COMMD1
		235896_s_at	SMCR7	222801_s_at	STAG3L4	235405_at	GSTA4							218424_s_at	STEAP3	226026_at	DIRC2
		235928_at	ZNF503-AS2	222806_s_at	C11orf30	235406_x_at	TMEM161B-AS1							218434_s_at	AACS	226039_at	MGAT4A
		235937_at	OCLN	222807_at	C11orf30	235428_at	LOC100507316							218450_at	HEBP1	226066_at	MITF
		235959_at	235959_at	222819_at	CTPS2	235429_at	EIF3E							218455_at	NFS1	226187_at	CDS1
		236046_at	FLJ44896	222850_s_at	DNAJB14	235443_at	CKMT2-AS1							218472_s_at	PELO	226245_at	KCTD1
		236076_at	LOC257396	222852_at	C10orf88	235483_at	STX3							218498_s_at	ERO1L	226246_at	KCTD1
		236131_at	236131_at	222931_s_at	THNSL1	235494_at	LSAMP							218530_at	FHOD1	226267_at	JDP2
		236168_at	236168_at	222963_s_at	IL1RAPL1	235532_at	235532_at							218538_s_at	MRS2	226278_at	SVIP
		236231_at	ZNF271	223095_at	MARVELD1	235540_at	GNRH1							218597_s_at	CISD1	226291_at	ALS2
		236273_at	NBPF1	223119_s_at	USP47	235547_at	N4BP2L2							218611_at	IER5	226326_at	PCGF5
		236297_at	236297_at	223121_s_at	SFRP2	235580_at	ZNF141							218656_s_at	LHFP	226393_at	CYP2U1
		236340_at	236340_at	223122_s_at	SFRP2	235603_at	HNRNPU							218681_s_at	SDF2L1	226463_at	ATP6V1C1
		236368_at	KIAA0368	223132_s_at	TRIM8	235604_x_at	ZNF493							218696_at	EIF2AK3	226482_s_at	TSTD1
		236369_at	TSPY26P	223189_x_at	KMT2E	235611_at	SREK1							218699_at	RAB7L1	226497_s_at	FLT1
		236428_at	236428_at	223190_s_at	KMT2E	235635_at	ARHGAP5							218700_s_at	RAB7L1	226531_at	ORAI1
		236446_at	236446_at	223227_at	BBS2	235683_at	SESN3							218704_at	RNF43	226542_at	226542_at
		236503_at	236503_at	223230_at	PRPF38A	235716_at	235716_at							218708_at	NXT1	226553_at	TMPRSS2
		236528_at	236528_at	223268_at	C11orf54	235725_at	SMAD4							218723_s_at	RGCC	226560_at	226560_at
		236574_at	236574_at	223313_s_at	223313_s_at	235729_at	ZNF514							218764_at	PRKCH	226568_at	FAM102B
		236636_at	236636_at	223318_s_at	ALKBH7	235730_at	235730_at							218772_x_at	TMEM38B	226599_at	FHDC1
		236645_at	236645_at	223351_at	C17orf80	235757_at	235757_at							218796_at	FERMT1	226600_at	TMTC3
		236675_at	RPA1	223457_at	COPG2	235786_at	235786_at							218801_at	UGGT2	226609_at	DCBLD1
		236680_at	236680_at	223520_s_at	KIF13A	235795_at	PAX6							218826_at	SLC35F2	226614_s_at	FAM167A
		236693_at	LINC00966	223538_at	223538_at	235810_at	ZNF182							218840_s_at	NADSYN1	226623_at	PHYHIPL
		236750_at	236750_at	223539_s_at	223539_s_at	235831_at	235831_at							218844_at	ACSF2	226641_at	ANKRD44
		236887_at	KIN	223569_at	PPAPDC1B	235847_at	235847_at							218849_s_at	PPP1R13L	226659_at	DEF6
		236909_at	CCDC173	223581_at	ZNF577	235893_at	235893_at							218856_at	TNFRSF21	226662_at	STX17
		236910_at	MRPL39	223608_at	EFCAB2	235902_at	235902_at							218858_at	DEPTOR	226668_at	WDSUB1
		236941_at	PRR14L	223627_at	MEX3B	235913_at	ZNF880							218884_s_at	GUF1	226683_at	SNX18
		236945_at	CCDC171	223652_at	AS3MT	235918_x_at	CEP97							218897_at	TMEM177	226694_at	226694_at
		236999_at	PPWD1	223717_s_at	ACRBP	235926_at	ANAPC5							218938_at	FBXL15	226702_at	CMPK2
		237018_at	237018_at	223718_at	ACRBP	235931_at	235931_at							218942_at	PIP4K2C	226709_at	ROBO2
		237044_s_at	ZNF503-AS2	223730_at	GPC6	235960_at	FXR1							218943_s_at	DDX58	226766_at	ROBO2
		237161_at	237161_at	223746_at	STK4	236000_s_at	236000_s_at							218984_at	PUS7	226778_at	TDRP
		237239_at	237239_at	223784_at	TMEM27	236004_at	236004_at							219037_at	RRP15	226790_at	MORN2
		237292_at	DPYSL3	223797_at	PRO2852	236018_at	236018_at							219038_at	MORC4	226817_at	DSC2
		237418_at	237418_at	223802_s_at	RBBP6	236072_at	236072_at							219045_at	RHOF	226824_at	CPXM2
		237444_at	KIF13A	223818_s_at	RSF1	236092_at	236092_at							219054_at	NPR3	226850_at	SUMF1
		237472_at	SOX1	223824_at	RNLS	236146_at	SYNCRIP							219062_s_at	ZCCHC2	226856_at	226856_at
		237616_at	237616_at	223846_at	AZI2	236149_at	236149_at							219064_at	ITIH5	226857_at	ARHGEF19
		237665_at	237665_at	223849_s_at	MOV10	236153_at	236153_at							219073_s_at	OSBPL10	226911_at	EGFLAM
		237745_at	TSC22D1-AS1	223854_at	223854_at	236154_at	QKI							219079_at	CYB5R4	226923_at	SCFD2
		237825_x_at	237825_x_at	223886_s_at	RNF146	236194_at	236194_at							219083_at	SHQ1	226930_at	FNDC1
		237918_at	237918_at	223915_at	BCOR	236196_at	236196_at							219102_at	RCN3	226955_at	AFAP1L1
		237973_at	237973_at	223924_at	TTC25	236202_at	236202_at							219121_s_at	ESRP1	226991_at	NFATC2
		238012_at	DPP7	223930_at	223930_at	236214_at	FAM71F1							219134_at	ELTD1	227007_at	TMCO4
		238029_s_at	SLC16A14	224172_at	224172_at	236215_at	236215_at							219136_s_at	LMF1	227026_at	MPHOSPH8
		238039_at	LOC728769	224185_at	WRAP53	236223_s_at	RIT1							219142_at	RASL11B	227032_at	PLXNA2
		238040_at	238040_at	224215_s_at	DLL1	236224_at	RIT1							219147_s_at	NMRK1	227046_at	SLC39A11
		238043_at	ARID1B	224242_at	GALP	236286_at	PROCA1							219148_at	PBK	227051_at	227051_at
		238117_at	PPOX	224275_at	GPR98	236314_at	EPM2AIP1							219167_at	RASL12	227053_at	PACSIN1
		238174_at	238174_at	224370_s_at	CAPS2	236321_at	FAM200B							219179_at	DACT1	227133_at	FAM199X
		238317_x_at	238317_x_at	224393_s_at	CECR6	236322_at	236322_at							219192_at	UBAP2	227140_at	INHBA
		238322_s_at	TEAD2	224442_at	PHF6	236337_at	SYCP2L							219196_at	SCG3	227156_at	CASK
		238455_at	238455_at	224494_x_at	HSD17B14	236370_at	236370_at							219225_at	PGBD5	227190_at	TMEM37
		238483_at	SSBP2	224497_x_at	HSD17B14	236375_at	236375_at							219257_s_at	SPHK1	227193_at	SLC30A4
		238552_at	238552_at	224507_s_at	MGC12916	236386_at	SUZ12P1							219263_at	RNF128	227194_at	FAM3B
		238625_at	C1orf168	224508_at	MGC12916	236411_at	236411_at							219288_at	C3orf14	227198_at	AFF3
		238633_at	EPC1	224521_s_at	CCDC77	236417_at	236417_at							219298_at	ECHDC3	227202_at	CNTN1
		238688_at	TPM1	224524_s_at	224524_s_at	236494_x_at	236494_x_at							219305_x_at	FBXO2	227209_at	CNTN1
		238712_at	238712_at	224574_at	224574_at	236502_at	236502_at							219307_at	PDSS2	227228_s_at	CCDC88C
		238755_at	RASSF10	224680_at	TMED4	236607_at	236607_at							219326_s_at	B3GNT2	227236_at	TSPAN2
		238775_at	ITFG1	224705_s_at	TNRC6A	236613_at	RBM25							219340_s_at	CLN8	227238_at	MUC15
		238787_at	DENND1B	224719_s_at	C12orf57	236649_at	DTWD1							219355_at	CXorf57	227241_at	MUC15
		238824_at	238824_at	224765_at	MSL1	236698_at	DYNC1I2							219358_s_at	ADAP2	227268_at	RNFT1
		238839_at	OTX1	224769_at	TAOK1	236723_at	236723_at							219414_at	CLSTN2	227314_at	ITGA2
		238946_at	238946_at	224772_at	NAV1	236808_at	FGFR1OP2							219429_at	FA2H	227379_at	MBOAT1
		238983_at	NSUN7	224778_s_at	TAOK1	236817_at	ADAT2							219439_at	C1GALT1	227391_x_at	LRRFIP1
		238989_at	238989_at	224800_at	WDFY1	236829_at	236829_at							219440_at	RAI2	227404_s_at	EGR1
		238994_at	OTUD7B	224804_s_at	FAM219B	236832_at	ADCY10P1							219443_at	TASP1	227450_at	ERP27
		239086_at	239086_at	224876_at	C5orf24	236862_at	GOPC							219513_s_at	SH2D3A	227467_at	RDH10
		239123_at	TSC22D1	224897_at	WDR26	236889_at	236889_at							219517_at	ELL3	227484_at	SRGAP1
		239154_at	239154_at	225046_at	LOC389831	236901_at	236901_at							219518_s_at	ELL3	227560_at	SFXN2
		239167_at	239167_at	225050_at	ZNF512	236907_at	236907_at							219528_s_at	BCL11B	227568_at	HECTD2
		239208_s_at	YBEY	225062_at	LOC389831	236911_at	RIMKLB							219545_at	219545_at	227609_at	EPSTI1
		239230_at	HES5	225074_at	RAB2B	236916_at	236916_at							219566_at	PLEKHF1	227642_at	TFCP2L1
		239271_at	SMAD2	225107_at	HNRNPA2B1	236922_at	236922_at							219569_s_at	SLC35G2	227669_at	MPC2
		239443_at	PCDHB6	225130_at	ZRANB1	236929_at	LOC441242							219616_at	ACSS3	227752_at	SPTLC3
		239539_at	239539_at	225178_at	TTC14	236962_at	236962_at							219619_at	DIRAS2	227753_at	TMEM139
		239544_at	239544_at	225180_at	TTC14	237062_at	237062_at							219622_at	RAB20	227758_at	RERG
		239585_at	239585_at	225228_at	DRAM2	237075_at	237075_at							219655_at	C7orf10	227763_at	LYPD6
		239609_s_at	LPCAT4	225230_at	DRAM2	237118_at	237118_at							219681_s_at	RAB11FIP1	227764_at	LYPD6
		239629_at	CFLAR	225272_at	SAT2	237180_at	237180_at							219688_at	BBS7	227782_at	ZBTB7C
		239660_at	RALGAPA2	225279_s_at	C3orf17	237217_at	ADAMTSL1							219692_at	KREMEN2	227785_at	SDCCAG8
		239696_at	239696_at	225300_at	KNSTRN	237247_at	USP51							219694_at	FAM105A	227826_s_at	227826_s_at
		239731_at	239731_at	225339_at	SPAG9	237265_at	237265_at							219702_at	PLAC1	227827_at	227827_at
		239752_at	239752_at	225352_at	SEC62	237301_at	237301_at							219703_at	MNS1	227838_at	UNC5C
		239771_at	CAND1	225385_s_at	HNRNPLL	237310_at	237310_at							219750_at	TMEM144	227856_at	C4orf32
		239772_x_at	DHX30	225396_at	RBBP4	237317_at	237317_at							219764_at	FZD10	227911_at	ARHGAP28
		239778_x_at	239778_x_at	225444_at	UBN2	237383_at	237383_at							219771_at	TBC1D8B	227945_at	TBC1D1
		239872_at	239872_at	225445_at	UBN2	237435_at	237435_at							219789_at	NPR3	227960_s_at	FAHD1
		239888_at	239888_at	225455_at	TADA1	237449_at	SP8							219814_at	MBNL3	227971_at	NRK
		239955_at	239955_at	225477_s_at	NR2C2	237456_at	237456_at							219821_s_at	GFOD1	228101_at	APBA1
		239965_at	239965_at	225486_at	ARID2	237470_at	DOCK7							219825_at	CYP26B1	228109_at	RASGRF2
		240008_at	240008_at	225487_at	TMEM18	237554_at	237554_at							219837_s_at	CYTL1	228153_at	RNF144B
		240104_at	240104_at	225490_at	ARID2	237577_at	PCNP							219863_at	HERC5	228158_at	228158_at
		240117_at	FBN3	225496_s_at	SYTL2	237626_at	237626_at							219867_at	CHODL	228181_at	SLC30A1
		240216_at	240216_at	225501_at	PHF6	237657_at	237657_at							219869_s_at	SLC39A8	228201_at	ARL13B
		240224_at	240224_at	225503_at	DHRSX	237741_at	SLC25A36							219885_at	SLFN12	228233_at	FREM1
		240279_at	240279_at	225526_at	MKLN1	237768_x_at	237768_x_at							219920_s_at	219920_s_at	228243_at	228243_at
		240317_at	PCDHB4	225534_at	SMIM19	237778_at	237778_at							219929_s_at	ZFYVE21	228360_at	LYPD6B
		240351_at	240351_at	225563_at	PAN3	237813_at	PCBP2							219933_at	GLRX2	228376_at	GGTA1P
		240417_at	240417_at	225595_at	CREBZF	237856_at	RAP1GDS1							219960_s_at	UCHL5	228377_at	KLHL14
		240424_s_at	LOC441204	225633_at	DPY19L3	237859_at	237859_at							219983_at	HRASLS	228378_at	C12orf29
		240579_at	NBAS	225656_at	EFHC1	237881_at	237881_at							219984_s_at	HRASLS	228450_at	PLEKHA7
		240607_at	MIAT	225668_at	FAM173B	237910_x_at	FAM92A1							219987_at	ERVMER34-1	228457_at	PPM1L
		240625_at	240625_at	225677_at	BCAP29	237932_at	237932_at							220013_at	EPHX3	228471_at	ANKRD44
		240666_at	240666_at	225700_at	GLCCI1	237933_at	237933_at							220038_at	220038_at	228485_s_at	SLC44A1
		240713_s_at	240713_s_at	225745_at	LRP6	237943_at	TMCC1							220073_s_at	PLEKHG6	228498_at	B4GALT1
		240733_at	240733_at	225752_at	NIPA1	238114_at	PCMTD1							220083_x_at	UCHL5	228542_at	MRS2
		240793_at	TTN	225755_at	KLHDC8B	238119_at	238119_at							220115_s_at	CDH10	228547_at	NRXN1
		240798_at	240798_at	225814_at	XRN1	238122_at	RBM12B							220116_at	KCNN2	228568_at	228568_at
		240824_at	240824_at	225836_s_at	RHNO1	238146_at	238146_at							220144_s_at	ANKEF1	228570_at	BTBD11
		240939_x_at	240939_x_at	225839_at	RBM33	238227_at	238227_at							220161_s_at	EPB41L4B	228642_at	HOTAIRM1
		241081_at	241081_at	225845_at	ZBTB44	238252_at	238252_at							220234_at	CA8	228654_at	SPIN4
		241155_at	241155_at	225886_at	DDX5	238279_x_at	238279_x_at							220255_at	FANCE	228673_s_at	EML4
		241202_at	241202_at	225903_at	PIGU	238295_at	TEFM							220272_at	BNC2	228699_at	NRP2
		241216_at	241216_at	225954_s_at	MIDN	238299_at	238299_at							220274_at	IQCA1	228708_at	RAB27B
		241262_at	241262_at	225956_at	CREBRF	238436_s_at	ZNF805							220275_at	CUZD1	228737_at	TOX2
		241337_at	241337_at	225957_at	CREBRF	238437_at	ZNF805							220319_s_at	MYLIP	228752_at	EFCAB4B
		241403_at	CLK4	225977_at	PCDH18	238472_at	FBXO9							220358_at	BATF3	228789_at	MTMR6
		241472_at	241472_at	225992_at	MLLT10	238488_at	238488_at							220435_at	SLC30A10	228790_at	FAM110B
		241473_at	241473_at	226029_at	VANGL2	238497_at	TMEM136							220448_at	KCNK12	228794_at	XIRP2
		241506_at	241506_at	226048_at	MAPK8	238504_at	C6orf57							220603_s_at	MCTP2	228809_at	228809_at
		241679_at	241679_at	226064_s_at	DGAT2	238565_at	238565_at							220638_s_at	CBLC	228915_at	DACH1
		241705_at	ABCA5	226102_at	226102_at	238566_at	ZNF334							220753_s_at	CRYL1	228953_at	WHAMM
		241751_at	OFD1	226119_at	PCMTD1	238593_at	C11orf80							220761_s_at	TAOK3	228966_at	PANK2
		241801_at	PGAP1	226148_at	ZBTB44	238595_at	238595_at							220865_s_at	PDSS1	228975_at	SP6
		241823_at	241823_at	226155_at	FAM160B1	238631_at	238631_at							220994_s_at	STXBP6	229013_at	LOC145783
		241838_at	241838_at	226156_at	AKT2	238706_at	PAPD4							221016_s_at	TCF7L1	229094_at	ATP6V0E2-AS1
		241917_at	241917_at	226164_x_at	RIMKLB	238723_at	ATXN3							221020_s_at	SLC25A32	229147_at	RASSF6
		241972_at	ZNF674-AS1	226176_s_at	USP42	238744_at	238744_at							221027_s_at	PLA2G12A	229194_at	PCGF5
		241994_at	XDH	226192_at	AR	238761_at	ELK4							221059_s_at	221059_s_at	229210_at	RNASEH2B
		242054_s_at	SIX3	226230_at	SMEK2	238769_at	238769_at							221080_s_at	DENND1C	229223_at	229223_at
		242120_at	242120_at	226250_at	226250_at	238781_at	SREK1							221194_s_at	RNFT1	229225_at	NRP2
		242156_at	242156_at	226252_at	226252_at	238812_at	238812_at							221204_s_at	CRTAC1	229233_at	NRG3
		242163_at	THRAP3	226254_s_at	KIAA1430	238908_at	238908_at							221215_s_at	RIPK4	229249_at	229249_at
		242210_at	ZNF24	226285_at	CAPRIN1	238918_at	238918_at							221268_s_at	SGPP1	229250_at	TPCN2
		242233_at	242233_at	226289_at	CAPRIN1	238956_at	EFNA2							221279_at	GDAP1	229255_x_at	229255_x_at
		242268_at	CELF2	226303_at	PGM5	238963_at	238963_at							221447_s_at	GLT8D2	229281_at	NPAS3
		242273_at	242273_at	226312_at	RICTOR	238970_at	238970_at							221492_s_at	ATG3	229339_at	MYOCD
		242277_at	242277_at	226318_at	TBRG1	239032_at	239032_at							221508_at	TAOK3	229461_x_at	NEGR1
		242310_at	242310_at	226337_at	GORAB	239034_at	CXorf24							221523_s_at	RRAGD	229469_at	229469_at
		242349_at	HECTD1	226344_at	ZMAT1	239040_at	HNRNPD							221539_at	EIF4EBP1	229506_at	PPM1L
		242374_at	242374_at	226346_at	MEX3A	239096_at	239096_at							221561_at	SOAT1	229521_at	CCDC71L
		242431_at	242431_at	226362_at	226362_at	239102_s_at	239102_s_at							221688_s_at	IMP3	229545_at	FERMT1
		242448_at	242448_at	226365_at	226365_at	239133_at	CTDSPL2							221697_at	MAP1LC3C	229606_at	229606_at
		242450_at	RGMB	226382_at	226382_at	239159_at	GOSR2							221701_s_at	STRA6	229620_at	SEPP1
		242481_at	242481_at	226384_at	PPAPDC1B	239160_at	239160_at							221729_at	COL5A2	229634_at	TMEM139
		242483_at	242483_at	226392_at	RASA2	239169_at	RDM1							221730_at	COL5A2	229657_at	THRB
		242506_at	242506_at	226399_at	DNAJB14	239171_at	239171_at							221748_s_at	TNS1	229674_at	SERTAD4
		242542_at	242542_at	226408_at	TEAD2	239184_at	239184_at							221760_at	MAN1A1	229714_at	HS6ST3
		242562_at	242562_at	226412_at	PNISR	239193_at	FUBP3							221773_at	ELK3	229715_at	NCR3LG1
		242563_at	242563_at	226426_at	ADNP	239253_at	239253_at							221814_at	GPR124	229720_at	BAG1
		242590_at	242590_at	226455_at	CREB3L4	239265_at	SLC35G1							221839_s_at	UBAP2	229730_at	SMTNL2
		242628_at	KLRB1	226457_at	226457_at	239278_at	239278_at							221840_at	PTPRE	229754_at	TMEM44-AS1
		242664_at	242664_at	226458_at	226458_at	239339_at	239339_at							221859_at	SYT13	229761_at	LOC440173
		242756_at	242756_at	226480_at	226480_at	239343_at	LOC728705							221861_at	ARRB1	229778_at	C12orf39
		242803_at	242803_at	226515_at	CCDC127	239358_at	239358_at							221868_at	PAIP2B	229801_at	PROSER2
		242856_at	242856_at	226519_s_at	PHYKPL	239384_at	FLJ44342							221898_at	PDPN	229824_at	SHC3
		242901_at	242901_at	226529_at	TMEM106B	239390_at	GTDC1							221916_at	NEFL	229844_at	FOXP1
		242903_at	IFNGR1	226571_s_at	PTPRS	239409_at	239409_at							221935_s_at	EOGT	229912_at	SDK1
		242986_at	NAV1	226588_at	CWC22	239422_at	GPC2							221960_s_at	RAB2A	229936_at	GFRA3
		243020_at	243020_at	226590_at	ZNF618	239425_at	DCUN1D5							221987_s_at	TSR1	230093_at	RSPH1
		243023_at	243023_at	226610_at	CENPV	239505_at	239505_at							222013_x_at	FAM86A	230122_at	MLLT10
		243049_at	243049_at	226611_s_at	CENPV	239516_at	239516_at							222020_s_at	NTM	230158_at	DPY19L2
		243091_at	243091_at	226665_at	AHSA2	239531_at	239531_at							222044_at	PCIF1	230233_at	230233_at
		243112_at	243112_at	226676_at	ZNF521	239537_at	ST8SIA2							222045_s_at	PCIF1	230261_at	ST8SIA4
		243162_at	243162_at	226677_at	ZNF521	239552_at	VWDE							222108_at	AMIGO2	230268_at	230268_at
		243170_at	243170_at	226692_at	226692_at	239571_at	239571_at							222231_s_at	LRRC59	230271_at	ONECUT2
		243243_at	GPC3	226715_at	FOXK1	239636_at	MCF2L							222236_s_at	ASAP3	230272_at	230272_at
		243292_at	FAM132A	226718_at	AMIGO1	239637_at	RAB18							222294_s_at	RAB27A	230294_at	230294_at
		243315_at	243315_at	226780_s_at	C7orf55	239644_at	239644_at							222305_at	HK2	230319_at	230319_at
		243322_at	243322_at	226783_at	PHYKPL	239699_s_at	239699_s_at							222376_at	222376_at	230333_at	230333_at
		243401_at	243401_at	226797_at	MBTD1	239711_at	ADAL							222446_s_at	BACE2	230362_at	INPP5F
		243455_at	243455_at	226807_at	ZFP1	239715_at	239715_at							222462_s_at	BACE1	230363_s_at	INPP5F
		243498_at	243498_at	226814_at	ADAMTS9	239734_at	239734_at							222489_s_at	WRNIP1	230479_at	EIF3F
		243512_x_at	243512_x_at	226842_at	FBXL20	239754_at	239754_at							222513_s_at	SORBS1	230480_at	PIWIL4
		243528_at	243528_at	226902_at	USP13	239757_at	ZFAND6							222557_at	STMN3	230486_at	230486_at
		243539_at	KIAA1841	226908_at	LRIG3	239811_at	239811_at							222582_at	PRKAG2	230496_at	AMER2
		243557_at	243557_at	226927_at	C12orf73	239819_at	239819_at							222646_s_at	ERO1L	230660_at	SERTAD4
		243558_at	243558_at	226939_at	CPEB2	239848_at	EIF3M							222653_at	PNPO	230722_at	BNC2
		243570_at	SPCS2	226954_at	UBE2R2	239854_at	SYCE3							222662_at	PPP1R3B	230748_at	SLC16A6
		243593_s_at	243593_s_at	226965_at	DENND6A	239892_at	239892_at							222698_s_at	IMPACT	230859_at	230859_at
		243672_at	SALL3	226971_at	CCDC136	239903_at	TPBG							222701_s_at	CHCHD7	230883_at	NXPH2
		243747_at	ZNF599	226972_s_at	CCDC136	239923_at	239923_at							222735_at	TMEM38B	230903_s_at	TDRP
		243785_at	LOC100272217	226979_at	MAP3K2	239926_at	239926_at							222736_s_at	TMEM38B	230964_at	FREM2
		243791_at	243791_at	226989_at	RGMB	239948_at	NUP153							222756_s_at	ARRB1	231032_at	LOC286071
		243806_at	243806_at	226999_at	RNPC3	239951_at	239951_at							222812_s_at	RHOF	231104_at	TDRD5
		243826_at	243826_at	227009_at	227009_at	239957_at	239957_at							222816_s_at	ZCCHC2	231114_at	SPATA22
		243851_at	243851_at	227031_at	SNX13	239992_at	239992_at							222870_s_at	B3GNT2	231179_at	IP6K3
		243865_x_at	243865_x_at	227059_at	GPC6	240076_at	240076_at							222872_x_at	NABP1	231358_at	MRO
		243895_x_at	243895_x_at	227081_at	DNALI1	240121_x_at	240121_x_at							222881_at	HPSE	231382_at	FGF18
		243948_at	243948_at	227082_at	227082_at	240139_at	240139_at							222912_at	ARRB1	231669_at	SEPP1
		243996_at	243996_at	227121_at	227121_at	240143_at	240143_at							222921_s_at	HEY2	231690_at	231690_at
		244020_at	244020_at	227154_at	IGSF21	240148_at	240148_at							222996_s_at	CXXC5	231697_s_at	VMP1
		244022_at	244022_at	227162_at	ZBTB26	240174_at	240174_at							223035_s_at	FARSB	231764_at	CHRAC1
		244156_at	244156_at	227166_at	DNAJC18	240185_at	LOC100147773							223078_s_at	TMOD3	231778_at	DLX3
		244218_at	244218_at	227168_at	MIAT	240230_s_at	AGAP9							223082_at	SH3KBP1	231779_at	IRAK2
		244267_at	SATB1	227169_at	DNAJC18	240239_at	ZNF566							223092_at	ANKH	231807_at	KIAA1217
		244298_at	244298_at	227273_at	227273_at	240269_at	240269_at							223129_x_at	MYLIP	231824_at	LARP1B
		244300_at	244300_at	227285_at	C1orf51	240271_at	240271_at							223130_s_at	MYLIP	231866_at	LNPEP
		244319_at	244319_at	227288_at	SREK1IP1	240307_at	240307_at							223233_s_at	CGN	231872_at	LRRCC1
		244321_at	PGAP1	227301_at	227301_at	240355_at	240355_at							223234_at	MAD2L2	231948_s_at	UBE2F
		244359_s_at	244359_s_at	227312_at	SNTB2	240357_at	240357_at							223278_at	GJB2	231986_at	RIMS1
		244370_at	KIAA2022	227331_at	ZNF740	240370_at	240370_at							223282_at	TSHZ1	232027_at	SYNE1
		244418_at	244418_at	227332_at	PXN-AS1	240383_at	UBE2D3							223296_at	SLC25A33	232034_at	LINC00537
		244443_at	CHD2	227339_at	RGMB	240442_at	240442_at							223312_at	PRADC1	232118_at	232118_at
		244665_at	244665_at	227351_at	C16orf52	240452_at	GSPT1							223316_at	CCDC3	232191_at	ERVH48-1
		244697_at	244697_at	227406_at	GABPB1-AS1	240538_at	240538_at							223322_at	RASSF5	232254_at	232254_at
		244774_at	PHACTR2	227412_at	PPP1R3E	240574_at	DNAJC3-AS1							223349_s_at	BOK	232275_s_at	HS6ST3
		32069_at	N4BP1	227421_at	YBEY	240588_at	240588_at							223373_s_at	PLA2G12A	232276_at	HS6ST3
		36499_at	CELSR2	227428_at	GABPA	240594_at	240594_at							223391_at	SGPP1	232327_at	THSD7B
		39891_at	ZNF710	227434_at	WBSCR17	240634_x_at	240634_x_at							223423_at	GPR160	232331_at	232331_at
		41660_at	CELSR1	227448_at	ARGLU1	240908_at	240908_at							223427_s_at	EPB41L4B	232422_at	GGACT
		43544_at	MED16	227455_at	C6orf136	240990_at	RAB5A							223437_at	PPARA	232431_at	NR3C1
		51158_at	FAM174B	227468_at	CPT1C	241205_at	241205_at							223438_s_at	PPARA	232446_at	MGC45800
		65630_at	TMEM80	227499_at	FZD3	241363_at	EXD3							223474_at	IRF2BPL	232591_s_at	TMEM30A
				227502_at	227502_at	241366_at	241366_at							223482_at	TMEM120A	232668_at	232668_at
				227509_x_at	227509_x_at	241372_at	ZC3H6							223492_s_at	LRRFIP1	232692_at	TDRD6
				227512_at	MEX3A	241374_at	TMEM39A							223518_at	DFFA	232738_at	CCSER1
				227524_at	FZD3	241384_x_at	GK5							223541_at	HAS3	232752_at	LOXL1-AS1
				227584_at	NAV1	241401_at	WDFY3-AS2							223551_at	PKIB	232799_at	232799_at
				227593_at	FLJ37453	241453_at	PTK2							223557_s_at	TMEFF2	232838_at	ASXL3
				227621_at	WTAP	241469_at	HFM1							223576_at	C6orf203	232874_at	DOCK9
				227630_at	PPP2R5E	241535_at	241535_at							223599_at	TRIM6	232946_s_at	NADSYN1
				227708_at	EEF1A1	241700_at	ZFHX4							223611_s_at	LNX1	233305_at	NECAB1
				227709_at	TPT1-AS1	241702_at	241702_at							223623_at	C2orf40	233835_at	LOC90246
				227719_at	SMAD9	241730_at	MYNN							223628_at	TMEM191A	233841_s_at	SUDS3
				227751_at	PDCD5	241746_at	CUL7							223649_s_at	SLC25A39	233944_at	233944_at
				227769_at	GPR27	241775_at	241775_at							223658_at	KCNK6	233976_at	233976_at
				227822_at	ZNF605	241793_at	MSS51							223723_at	MFI2	234303_s_at	GPR85
				227835_at	LOC389831	241825_at	TYW5							223773_s_at	223773_s_at	234344_at	LOC100288675
				227837_at	227837_at	241834_at	241834_at							223774_at	223774_at	234463_at	234463_at
				227866_at	TIAM2	241843_at	241843_at							223821_s_at	SUSD4	235070_at	RBFOX1
				227875_at	KLHL13	241853_at	241853_at							223868_s_at	WWOX	235085_at	SGK223
				227878_s_at	ALKBH7	241885_at	241885_at							223907_s_at	PINX1	235092_at	235092_at
				227921_at	LOC100507312	241897_at	241897_at							223989_s_at	REXO2	235118_at	CADM2
				227931_at	INO80D	241905_at	PIK3C2A							224037_at	SDAD1	235144_at	RASEF
				227934_at	KPNA5	241911_at	CDKL3							224367_at	BEX2	235146_at	TMCC3
				227940_at	LOC339803	241913_at	241913_at							224407_s_at	MST4	235152_at	235152_at
				227941_at	LOC339803	241936_x_at	241936_x_at							224428_s_at	CDCA7	235201_at	FOXP2
				227979_at	RBM4	241991_at	241991_at							224453_s_at	ETNK1	235228_at	CCDC85A
				227996_at	FARP1	242008_at	242008_at							224463_s_at	C11orf70	235247_at	235247_at
				228023_x_at	228023_x_at	242024_at	242024_at							224495_at	TMEM107	235252_at	KSR1
				228027_at	228027_at	242052_at	242052_at							224496_s_at	TMEM107	235276_at	EPSTI1
				228038_at	SOX2	242068_at	242068_at							224509_s_at	RTN4IP1	235299_at	SLC41A2
				228046_at	ZNF827	242111_at	METTL3							224516_s_at	CXXC5	235334_at	ST6GALNAC3
				228070_at	PPP2R5E	242121_at	FTX							224560_at	TIMP2	235337_at	SERTAD4
				228081_at	CCNG2	242128_at	OTX2							224569_s_at	IRF2BP2	235341_at	DNAJC3
				228088_at	SESTD1	242176_at	MEF2A							224570_s_at	IRF2BP2	235342_at	SPOCK3
				228180_at	228180_at	242188_at	242188_at							224571_at	IRF2BP2	235350_at	C4orf19
				228185_at	ZNF25	242201_at	PMS2P5							224583_at	COTL1	235371_at	GXYLT2
				228205_at	TKT	242225_at	242225_at							224602_at	C4orf3	235457_at	MAML2
				228211_at	ERCC6L2	242261_at	IREB2							224632_at	GPATCH4	235465_at	AMER2
				228225_at	PEX2	242270_at	242270_at							224634_at	GPATCH4	235467_s_at	KCNC4
				228248_at	RICTOR	242272_at	ZNF785							224641_at	FYTTD1	235562_at	C3orf70
				228287_at	ING5	242279_at	242279_at							224642_at	FYTTD1	235592_at	235592_at
				228328_at	KLHL28	242289_at	242289_at							224690_at	FAM210B	235606_at	LINC00883
				228349_at	KIAA1958	242305_at	LOC645513							224693_at	FAM210B	235638_at	RASSF6
				228358_at	SOX12	242306_at	242306_at							224698_at	ESYT2	235678_at	GM2A
				228387_at	LOC100996511	242343_x_at	242343_x_at							224700_at	STT3B	235692_at	SH3KBP1
				228389_at	228389_at	242358_at	RASSF8-AS1							224744_at	IMPAD1	235707_at	SMIM13
				228392_at	ZNF302	242369_x_at	242369_x_at							224799_at	NDFIP2	235728_at	ZFP3
				228398_at	SENP8	242440_at	242440_at							224806_at	TRIM25	235733_at	GXYLT2
				228427_at	FBXO16	242446_at	C6orf163							224817_at	SH3PXD2A	235737_at	TSLP
				228454_at	LCOR	242457_at	242457_at							224822_at	DLC1	235739_at	235739_at
				228455_at	228455_at	242462_at	LINC00665							224847_at	CDK6	235766_x_at	RAB27A
				228480_at	VAPA	242467_at	242467_at							224851_at	CDK6	235874_at	PRSS35
				228482_at	228482_at	242471_at	SRGAP2B							224869_s_at	MRPS25	235898_at	235898_at
				228494_at	PPP1R9A	242476_at	242476_at							224882_at	ACSS1	235904_at	UGT3A1
				228510_at	ATAT1	242576_x_at	242576_x_at							224917_at	224917_at	235976_at	SLITRK6
				228519_x_at	CIRBP	242620_at	242620_at							224932_at	CHCHD10	236031_x_at	FREM1
				228529_at	NAA38	242647_at	USP34							224970_at	NFIA	236042_at	LOC100130219
				228545_at	ZNF148	242673_at	242673_at							224975_at	NFIA	236079_at	LOC202025
				228584_at	SGCB	242688_at	242688_at							224994_at	CAMK2D	236140_at	GCLM
				228613_at	RAB11FIP3	242708_at	242708_at							224995_at	SPIRE1	236144_at	CPXM2
				228641_at	CARD8	242711_x_at	FANCM							225001_at	RAB3D	236279_at	236279_at
				228647_at	LOC100049716	242725_at	242725_at							225003_at	TMEM205	236302_at	PPM1E
				228658_at	MIAT	242778_at	LPXN							225019_at	CAMK2D	236388_at	STRN
				228670_at	TEP1	242812_at	HCG18							225033_at	ST3GAL1	236420_s_at	ANO4
				228709_at	TPR	242819_at	242819_at							225036_at	TOMM5	236429_at	ZNF83
				228713_s_at	HSD17B14	242834_at	242834_at							225056_at	SIPA1L2	236442_at	DPF3
				228742_at	228742_at	242836_at	242836_at							225060_at	LRP11	236468_at	TMEM132B
				228753_at	228753_at	242853_at	242853_at							225102_at	MGLL	236471_at	NFE2L3
				228788_at	YPEL1	242859_at	242859_at							225114_at	AGPS	236487_at	SCLT1
				228894_at	228894_at	242865_at	242865_at							225119_at	CHMP4B	236519_at	C9orf135
				228905_at	PCM1	242900_at	ALG10B							225146_at	FAM219A	236534_at	BNIPL
				228916_at	CWF19L2	242969_at	ZNF780B							225157_at	MLXIP	236565_s_at	LARP6
				228917_at	228917_at	242974_at	CD47							225171_at	ARHGAP18	236571_at	236571_at
				228920_at	ZNF260	243008_at	RHEB							225173_at	ARHGAP18	236610_at	236610_at
				228927_at	ZNF397	243009_at	243009_at							225202_at	RHOBTB3	236632_at	HHIP-AS1
				228940_at	NDUFB4	243013_at	243013_at							225284_at	DNAJC3	236666_s_at	LRRC10B
				228941_at	ALG10B	243030_at	243030_at							225290_at	ETNK1	236712_at	236712_at
				228946_at	INTU	243055_at	243055_at							225304_s_at	225304_s_at	236725_at	WWC1
				228948_at	EPHA4	243113_at	243113_at							225366_at	PGM2	236828_at	236828_at
				228960_at	NARG2	243176_at	ARL5A							225380_at	PKDCC	236840_at	C12orf56
				228961_at	MIER3	243183_at	243183_at							225400_at	TSEN15	236947_at	236947_at
				228963_at	228963_at	243219_x_at	MRPL50							225407_at	MBP	236987_at	ALPK2
				228967_at	EIF1	243233_at	243233_at							225427_s_at	APOA1BP	237030_at	ACPP
				228981_at	TMEM169	243236_at	243236_at							225450_at	AMOTL1	237116_at	LOC646903
				228983_at	228983_at	243253_at	243253_at							225479_at	LRRC58	237128_at	237128_at
				228993_s_at	BBIP1	243275_at	243275_at							225522_at	AAK1	237206_at	MYOCD
				228999_at	CHD2	243303_at	243303_at							225543_at	GTF3C4	237211_x_at	MORN3
				229009_at	SIX5	243332_at	243332_at							225557_at	CSRNP1	237274_at	LOC100505547
				229016_s_at	TRERF1	243347_at	243347_at							225564_at	SPATA13	237439_at	USP43
				229017_s_at	DSTYK	243350_at	243350_at							225567_at	LINC00984	237461_at	NLRP7
				229033_s_at	MUM1	243381_at	243381_at							225573_at	225573_at	237727_at	237727_at
				229066_at	229066_at	243462_s_at	243462_s_at							225582_at	ITPRIP	237802_at	XKR4
				229111_at	229111_at	243463_s_at	RIT1							225613_at	MAST4	237810_at	CLDN6
				229118_at	PRRG3	243490_at	243490_at							225615_at	IFFO2	237974_at	237974_at
				229133_s_at	ZNF397	243525_at	243525_at							225626_at	PAG1	237995_at	RIMBP2
				229143_at	CNOT3	243527_at	243527_at							225634_at	ZC3HAV1	238021_s_at	CRNDE
				229145_at	ANAPC16	243537_at	243537_at							225642_at	225642_at	238022_at	CRNDE
				229153_at	SLC7A6OS	243546_at	243546_at							225655_at	UHRF1	238055_at	LOC100505549
				229184_at	CCNT2	243559_at	243559_at							225671_at	SPNS2	238063_at	TMEM154
				229193_at	LUC7L3	243617_at	ZNF827							225681_at	CTHRC1	238439_at	ANKRD22
				229206_at	229206_at	243648_at	ZBED6							225716_at	BRI3BP	238451_at	MPP7
				229226_at	229226_at	243664_at	TXNL1							225739_at	RAB11FIP4	238463_at	LOC100506834
				229231_at	229231_at	243671_at	243671_at							225798_at	JAZF1	238478_at	BNC2
				229240_at	ZDHHC21	243707_at	243707_at							225799_at	225799_at	238513_at	PRRG4
				229243_at	229243_at	243745_at	243745_at							225800_at	JAZF1	238567_at	SGPP2
				229278_at	USP51	243829_at	BRAF							225809_at	PARM1	238617_at	KIF26B
				229302_at	TMEM178A	243855_at	243855_at							225817_at	CGNL1	238692_at	BTBD11
				229307_at	ANKRD28	243880_at	GOSR2							225842_at	PHLDA1	238693_at	PHC3
				229312_s_at	GKAP1	243966_at	243966_at							225846_at	ESRP1	238739_at	IPMK
				229319_at	229319_at	243976_at	243976_at							225871_at	STEAP2	238763_at	RBM20
				229321_s_at	229321_s_at	244014_x_at	244014_x_at							225955_at	METRNL	238778_at	MPP7
				229331_at	SPATA18	244045_at	244045_at							225968_at	PRICKLE2	238784_at	DPY19L2
				229335_at	CADM4	244049_at	244049_at							226017_at	CMTM7	238805_at	238805_at
				229344_x_at	RIMKLB	244112_x_at	244112_x_at							226019_at	OMA1	238846_at	TNFRSF11A
				229346_at	NES	244132_x_at	ZNF518A							226020_s_at	226020_s_at	238858_at	TIFA
				229360_at	ZNF280B	244165_at	FAM208B							226025_at	ANKRD28	238912_x_at	C9orf85
				229364_at	LOC100631377	244198_at	RANBP17							226086_at	SYT13	238919_at	238919_at
				229374_at	EPHA4	244286_at	244286_at							226099_at	ELL2	238953_at	LOC100506325
				229378_at	STOX1	244292_at	244292_at							226117_at	TIFA	239028_at	LYPD6
				229413_s_at	PCGF3	244320_at	NHLRC2							226132_s_at	MANEAL	239148_at	MARVELD3
				229422_at	NRD1	244340_x_at	244340_x_at							226152_at	TTC7B	239297_at	KIAA1456
				229433_at	RBM26	244341_at	244341_at							226153_s_at	CNOT6L	239309_at	DLX6
				229435_at	GLIS3	244356_at	244356_at							226167_at	SYT7	239345_at	SLC19A3
				229452_at	TMEM88	244360_at	FBXL17							226185_at	CDS1	239350_at	MARVELD3
				229454_at	BCLAF1	244383_at	244383_at							226186_at	TMOD2	239466_at	LINC00883
				229465_s_at	PTPRS	244424_at	LOC439938							226193_x_at	226193_x_at	239488_at	PPM1L
				229467_at	PCBP2	244444_at	PKD1L2							226202_at	ZNF398	239578_at	239578_at
				229483_at	229483_at	244633_at	244633_at							226225_at	MCC	239587_at	239587_at
				229491_at	SLC9B2	244674_at	244674_at							226269_at	GDAP1	239606_at	239606_at
				229514_at	GPATCH2L	244778_x_at	244778_x_at							226271_at	GDAP1	239673_at	239673_at
				229520_s_at	GPATCH2L	244787_at	244787_at							226273_at	CLCN5	239723_at	239723_at
				229540_at	RBPJ	244860_at	244860_at							226274_at	CLCN5	239770_at	ESYT3
				229544_at	229544_at	244878_at	244878_at							226281_at	DNER	239834_at	239834_at
				229571_at	229571_at	31799_at	31799_at							226292_at	CAPN5	239885_at	239885_at
				229574_at	TRA2A	37577_at	ARHGAP19							226302_at	ATP8B1	239970_at	239970_at
				229586_at	CHD9	48031_r_at	FAXDC2							226351_at	NSUN4	239990_at	239990_at
				229630_s_at	WTAP	51228_at	RBM12B							226354_at	LACTB	240012_at	240012_at
				229637_at	RIC8B	58780_s_at	ARHGEF40							226430_at	RELL1	240038_at	240038_at
				229672_at	UQCC	64408_s_at	CALML4							226432_at	ETNK1	240119_at	TEPP
				229692_at	229692_at	64432_at	MAPKAPK5-AS1							226433_at	RNF157	240122_at	DIRAS2
				229694_at	WDR11	81811_at	81811_at							226448_at	226448_at	240242_at	240242_at
				229706_at	TCERG1									226462_at	STXBP6	240245_at	240245_at
				229722_at	LOC100270804									226498_at	FLT1	240295_at	240295_at
				229762_at	229762_at									226510_at	HEATR5A	240402_at	KIRREL3
				229773_at	SNAP23									226534_at	KITLG	240433_x_at	CADM2
				229908_s_at	UNKL									226545_at	CD109	240479_at	HS3ST5
				229956_at	NR2C1									226576_at	ARHGAP26	240673_at	240673_at
				229966_at	EWSR1									226582_at	LOC400043	240801_at	C21orf37
				230022_at	CLEC18A									226621_at	226621_at	241002_at	241002_at
				230056_at	BPTF									226636_at	PLD1	241382_at	PCP4L1
				230058_at	SDCCAG3									226658_at	PDPN	241399_at	FAM19A2
				230067_at	FAM124A									226725_at	226725_at	241534_at	LOC100505549
				230079_at	ST7L									226731_at	226731_at	241871_at	CAMK4
				230087_at	PRIMA1									226748_at	LYSMD2	241893_at	241893_at
				230097_at	GART									226755_at	MIR205HG	241926_s_at	ERG
				230099_at	230099_at									226771_at	ATP8B2	242003_at	ERICH1
				230129_at	PSTK									226784_at	TWISTNB	242051_at	242051_at
				230142_s_at	CIRBP									226791_at	KIFC2	242056_at	TRIM45
				230166_at	KIAA1958									226792_s_at	KIFC2	242100_at	CHSY3
				230180_at	DDX17									226796_at	ABHD15	242138_at	DLX1
				230183_at	EXT1									226806_s_at	NFIA	242245_at	242245_at
				230185_at	THAP9									226811_at	FAM46C	242281_at	GLUL
				230198_at	230198_at									226829_at	AFAP1L2	242387_at	TDRP
				230205_at	ZNF561									226863_at	FAM110C	242417_at	LOC283278
				230229_at	DLG1									226870_at	COMTD1	242517_at	KISS1R
				230245_s_at	LINC00926									226872_at	RFX2	242764_at	DCHS2
				230258_at	GLIS3									226907_at	PPP1R14C	242940_x_at	DLX6
				230264_s_at	AP1S2									226912_at	ZDHHC23	242979_at	IRS1
				230274_s_at	230274_s_at									226933_s_at	ID4	242981_at	242981_at
				230292_at	230292_at									226938_at	DCAF4	243041_s_at	243041_s_at
				230293_at	MEAF6									226961_at	PRR15	243087_at	WDR63
				230312_at	230312_at									226974_at	NEDD4L	243179_at	243179_at
				230324_at	230324_at									226978_at	PPARA	243252_at	243252_at
				230328_at	230328_at									227001_at	NIPAL2	243294_at	ZNF780B
				230336_at	230336_at									227002_at	FAM78A	243351_at	FZD10-AS1
				230375_at	PNISR									227017_at	ERICH1	243510_at	243510_at
				230380_at	THAP2									227038_at	SGMS2	243681_at	SHANK2
				230387_at	230387_at									227067_x_at	NOTCH2NL	243773_at	PDCD2
				230392_at	230392_at									227070_at	GLT8D2	243856_at	LANCL3
				230395_at	230395_at									227103_s_at	ECE2	244026_at	244026_at
				230401_at	230401_at									227115_at	LOC100506870	244111_at	KRT222
				230407_at	SBNO1									227135_at	NAAA	244350_at	MYO10
				230413_s_at	230413_s_at									227144_at	KIAA0930	244387_at	244387_at
				230424_at	NREP									227158_at	DTD2	244428_at	DNMT3A
				230462_at	NUMB									227167_s_at	RASSF3	244461_at	SPECC1
				230477_at	PARD6G-AS1									227174_at	WDR72	244623_at	KCNQ5
				230493_at	SHISA2									227176_at	SLC2A13	244738_at	BRWD3
				230516_at	MALSU1									227177_at	CORO2A	244749_at	244749_at
				230519_at	FAM124A									227250_at	KREMEN1	244780_at	SGPP2
				230537_at	230537_at									227282_at	PCDH19	244829_at	LINC00518
				230569_at	KIAA1430									227297_at	ITGA9	244832_at	244832_at
				230573_at	SGK2									227337_at	ANKRD37	244867_at	244867_at
				230595_at	PGM5-AS1									227354_at	PAG1	33494_at	ETFDH
				230599_at	230599_at									227394_at	NCAM1	336_at	TBXA2R
				230651_at	230651_at									227399_at	VGLL3	33767_at	NEFH
				230653_at	230653_at									227437_at	DYNLL1-AS1	35820_at	GM2A
				230664_at	H2BFXP									227476_at	LPGAT1	38671_at	PLXND1
				230669_at	RASA2									227558_at	CBX4	40016_g_at	MAST4
				230678_at	RGS5									227566_at	NTM	44120_at	ADCK2
				230687_at	SLC13A3									227579_at	FER	55081_at	MICALL1
				230700_at	RTN4RL1									227623_at	CACNA2D1	57163_at	ELOVL1
				230712_at	NBPF1									227627_at	227627_at	60474_at	FERMT1
				230713_at	230713_at									227646_at	EBF1	65517_at	AP1M2
				230715_at	ZNF518B									227702_at	CYP4X1
				230721_at	C16orf52									227705_at	TCEAL7
				230724_s_at	C11orf57									227742_at	CLIC6
				230742_at	RBM5									227747_at	MPZL3
				230779_at	TNRC6B									227760_at	IGFBPL1
				230789_at	ZNF280B									227780_s_at	ECSCR
				230821_at	ZNF148									227794_at	227794_at
				230831_at	FRMD5									227816_at	NTN1
				230850_at	230850_at									227830_at	GABRB3
				230871_at	DHX30									227867_at	TRABD2A
				230886_at	230886_at									227868_at	LOC154761
				230894_s_at	230894_s_at									227871_at	CHM
				230904_at	FSD1L									227909_at	227909_at
				230906_at	GALNT10									227920_at	BEND3
				230927_at	230927_at									227932_at	ARIH2
				230961_at	230961_at									227959_at	227959_at
				230979_at	230979_at									227970_at	GPR157
				230998_at	230998_at									227985_at	LOC100506098
				230999_at	ST3GAL4-AS1									227987_at	VPS13A
				231005_at	231005_at									227999_at	PWWP2B
				231022_at	OCLN									228014_at	PTRH1
				231057_at	231057_at									228062_at	NAP1L5
				231087_at	231087_at									228063_s_at	NAP1L5
				231101_at	231101_at									228066_at	C17orf96
				231108_at	FUS									228069_at	MTFR2
				231112_at	SNRPE									228080_at	LAYN
				231165_at	231165_at									228097_at	MYLIP
				231251_at	WIPF2									228098_s_at	MYLIP
				231281_at	231281_at									228100_at	PIFO
				231295_at	ME3									228145_s_at	ZNF398
				231325_at	UNC5D									228184_at	DISP1
				231361_at	NLGN1									228236_at	SLC52A3
				231449_at	231449_at									228237_at	PAPPA2
				231521_at	231521_at									228244_at	BLOC1S3
				231644_at	231644_at									228256_s_at	EPB41L4A
				231716_at	RC3H2									228280_at	ZC3HAV1L
				231725_at	PCDHB2									228304_at	RBM43
				231738_at	PCDHB7									228320_x_at	CCDC64
				231800_s_at	DMRT3									228335_at	CLDN11
				231899_at	ZC3H12C									228339_at	ECSCR
				231902_at	ZNF827									228347_at	SIX1
				231921_at	DCAF17									228359_at	UBASH3B
				231938_at	SGOL1									228365_at	CPNE8
				231939_s_at	BDP1									228440_at	228440_at
				231953_at	BPTF									228473_at	MSX1
				231954_at	DKFZP434I0714									228487_s_at	RREB1
				231975_s_at	MIER3									228488_at	TBC1D16
				232013_at	ERCC6L2									228497_at	SLC22A15
				232030_at	EPG5									228499_at	PFKFB4
				232052_at	SETD5-AS1									228507_at	PDE3A
				232094_at	KATNBL1									228598_at	DPP10
				232097_at	TOX4									228618_at	PEAR1
				232098_at	DST									228624_at	TMEM144
				232102_at	METTL6									228634_s_at	YBX3
				232107_at	232107_at									228635_at	PCDH10
				232121_at	TRDMT1									228674_s_at	EML4
				232125_at	232125_at									228690_s_at	NDUFA11
				232140_at	LOC100132352									228706_s_at	CLDN23
				232145_at	C2orf68									228707_at	CLDN23
				232150_at	232150_at									228716_at	THRB
				232174_at	232174_at									228728_at	CPED1
				232205_at	232205_at									228772_at	HNMT
				232264_at	232264_at									228796_at	CPNE4
				232282_at	WNK3									228827_at	RUNX1T1
				232284_at	232284_at									228850_s_at	SLIT2
				232319_at	232319_at									228851_s_at	ENSA
				232356_at	232356_at									228852_at	ENSA
				232371_at	MARCH7									228875_at	FAM162B
				232372_at	232372_at									228889_at	ARHGAP5-AS1
				232382_s_at	PCMTD1									228937_at	LACC1
				232395_x_at	AGBL3									228954_at	LYSMD4
				232396_at	232396_at									228956_at	UGT8
				232441_at	KRR1									228964_at	PRDM1
				232466_at	CUL4A									228977_at	LOC729680
				232473_at	232473_at									228990_at	228990_at
				232483_at	MED17									229039_at	SYN2
				232488_at	PHYKPL									229074_at	EHD4
				232511_at	232511_at									229088_at	ENPP1
				232528_at	232528_at									229125_at	KANK4
				232529_at	SP3									229132_at	MINA
				232535_at	232535_at									229160_at	MUM1L1
				232552_at	DAAM1									229256_at	PGM2L1
				232571_at	232571_at									229271_x_at	COL11A1
				232587_at	EML4									229292_at	EPB41L5
				232592_at	232592_at									229300_at	RAB3C
				232597_x_at	SCAF11									229309_at	ADRB1
				232600_at	232600_at									229310_at	KLHL29
				232601_at	232601_at									229327_s_at	MAF
				232615_at	232615_at									229332_at	HPDL
				232626_at	232626_at									229385_s_at	TINCR
				232628_at	232628_at									229396_at	OVOL1
				232632_at	232632_at									229484_at	PPM1J
				232633_at	XRCC5									229487_at	EBF1
				232647_at	PROCA1									229518_at	FAM46B
				232676_x_at	MYEF2									229553_at	PGM2L1
				232710_at	232710_at									229580_at	229580_at
				232726_at	232726_at									229595_at	CHCHD4
				232734_at	TTC23									229613_at	229613_at
				232740_at	MCM3AP-AS1									229616_s_at	GRAMD2
				232758_s_at	232758_s_at									229626_at	C12orf68
				232773_at	232773_at									229640_x_at	LINC00621
				232791_at	232791_at									229641_at	CCBE1
				232796_at	232796_at									229656_s_at	EML6
				232797_at	232797_at									229724_at	GABRB3
				232826_at	232826_at									229797_at	MCOLN3
				232864_s_at	AFF4									229812_at	USP48
				232865_at	AFF4									229823_at	RIMS2
				232884_s_at	ZNF853									229842_at	ELF3
				232889_at	232889_at									229873_at	KCTD21
				232890_at	232890_at									229951_x_at	229951_x_at
				232898_at	DAB2									230025_at	GJD3
				232911_at	ZFP14									230051_at	PROSER2
				232914_s_at	SYTL2									230104_s_at	TPPP
				232916_at	232916_at									230113_at	MBNL3
				232939_at	232939_at									230130_at	SLIT2
				232991_at	232991_at									230151_at	SPRYD7
				232999_at	232999_at									230163_at	GFRA1
				233007_at	233007_at									230204_at	HAPLN1
				233014_at	233014_at									230243_at	TRMT10A
				233022_at	TRPM3									230276_at	FAM49A
				233037_at	233037_at									230303_at	SYNPR
				233039_at	233039_at									230356_at	230356_at
				233055_at	233055_at									230430_at	ENTPD2
				233068_at	233068_at									230438_at	TBX15
				233090_at	233090_at									230466_s_at	RASSF3
				233099_at	233099_at									230490_x_at	RSU1
				233101_at	MTMR9									230492_s_at	GPCPD1
				233113_at	ADAMTS9-AS2									230503_at	230503_at
				233152_x_at	233152_x_at									230508_at	DKK3
				233180_at	233180_at									230518_at	MPZL2
				233182_x_at	ATXN3									230547_at	KCNC1
				233187_s_at	233187_s_at									230623_x_at	USP28
				233214_at	233214_at									230647_at	TMEM53
				233219_at	233219_at									230655_at	230655_at
				233229_at	SCFD1									230710_at	MIR210HG
				233246_at	233246_at									230755_at	RHBDL3
				233249_at	233249_at									230769_at	DENND2C
				233264_at	233264_at									230788_at	GCNT2
				233270_x_at	233270_x_at									230836_at	ST8SIA4
				233276_at	233276_at									230861_at	DKFZP434L187
				233290_at	233290_at									230895_at	HAPLN1
				233291_at	233291_at									230925_at	APBB1IP
				233300_at	233300_at									230951_at	EPB41L5
				233303_at	233303_at									230973_at	SH2D5
				233306_at	233306_at									231015_at	KLF15
				233313_at	233313_at									231120_x_at	PKIB
				233354_at	233354_at									231136_at	MIR30C2
				233359_at	233359_at									231166_at	GPR155
				233401_at	233401_at									231175_at	BEND6
				233405_at	233405_at									231195_at	KLRG2
				233445_at	233445_at									231202_at	ALDH1L2
				233448_s_at	233448_s_at									231257_at	TCERG1L
				233461_x_at	ZNF226									231270_at	231270_at
				233479_at	233479_at									231285_at	231285_at
				233530_at	SDCBP2-AS1									231319_x_at	KIF9
				233539_at	NAPEPLD									231336_at	CPNE4
				233548_at	233548_at									231337_at	231337_at
				233558_s_at	TRAPPC11									231341_at	SLC35D3
				233559_s_at	WDFY1									231411_at	LHFP
				233575_s_at	TLE4									231431_s_at	LINC00984
				233595_at	USP34									231460_at	231460_at
				233622_x_at	233622_x_at									231489_x_at	231489_x_at
				233635_at	233635_at									231532_at	NCAM1
				233667_at	233667_at									231576_at	231576_at
				233730_at	FAM135A									231579_s_at	TIMP2
				233786_at	233786_at									231698_at	231698_at
				233788_at	233788_at									231793_s_at	CAMK2D
				233792_at	233792_at									231810_at	BRI3BP
				233793_at	233793_at									231837_at	USP28
				233836_at	TNRC6A									231841_s_at	KIAA1462
				233867_at	233867_at									231842_at	KIAA1462
				233869_x_at	233869_x_at									231867_at	TENM2
				233874_at	SLAIN2									231930_at	231930_at
				233908_x_at	233908_x_at									231991_at	CCM2L
				233929_x_at	WASH3P									232001_at	PRKCQ-AS1
				233940_at	233940_at									232054_at	PCDH20
				233957_at	233957_at									232064_at	FER
				233963_at	H2BFXP									232101_s_at	PIGN
				233977_at	GREB1L									232176_at	SLITRK6
				233995_at	233995_at									232195_at	GPR158
				234073_at	SDK2									232201_at	NKD2
				234148_at	234148_at									232204_at	EBF1
				234192_s_at	GKAP1									232231_at	RUNX2
				234297_at	234297_at									232437_at	CPSF3L
				234326_at	234326_at									232481_s_at	SLITRK6
				234604_at	234604_at									232631_at	CDH6
				234649_at	234649_at									232720_at	LINGO2
				234650_at	234650_at									232925_at	232925_at
				234923_at	RALGAPA1									232935_at	232935_at
				234985_at	LDLRAD3									233072_at	NTNG2
				235004_at	RBM24									233085_s_at	NABP1
				235023_at	VPS13C									233136_at	PABPC5
				235028_at	235028_at									233233_at	RASSF3
				235053_at	235053_at									233255_s_at	BIVM
				235063_at	C20orf196									233261_at	EBF1
				235067_at	MKLN1									233297_s_at	233297_s_at
				235072_s_at	KIF13A									233446_at	ONECUT2
				235082_at	PCNX									233536_at	ASXL3
				235112_at	235112_at									233587_s_at	SIPA1L2
				235124_at	EIF3J-AS1									233748_x_at	PRKAG2
				235138_at	235138_at									233955_x_at	CXXC5
				235164_at	ZNF25									234294_x_at	GATAD2A
				235166_at	ZNF148									234986_at	GCLM
				235190_at	235190_at									235012_at	LRCH1
				235217_at	LINC01004									235022_at	FAM210A
				235224_s_at	CAND1									235046_at	INPP4B
				235238_at	SHC4									235099_at	CMTM8
				235268_at	235268_at									235117_at	CHAC2
				235283_at	INTS6									235143_at	SLC10A7
				235288_at	235288_at									235149_at	PGM2L1
				235308_at	ZBTB20									235171_at	LOC100505501
				235309_at	RPS15A									235236_at	235236_at
				235315_at	TSC22D1									235245_at	TMEM92
				235390_at	SREK1IP1									235251_at	235251_at
				235419_at	235419_at									235256_s_at	GALM
				235422_at	235422_at									235275_at	BMP8B
				235464_at	CSNK1A1									235287_at	CDK6
				235469_at	235469_at									235489_at	RHOJ
				235473_at	235473_at									235570_at	RBMS3
				235493_at	235493_at									235666_at	ITGA8
				235501_at	235501_at									235668_at	PRDM1
				235515_at	SYNE4									235723_at	BNC2
				235520_at	ZNF280C									235736_at	SMKR1
				235526_at	235526_at									235771_at	235771_at
				235555_at	235555_at									235798_at	TMEM170B
				235556_at	CREBRF									235944_at	HMCN1
				235601_at	235601_at									235971_at	235971_at
				235612_at	235612_at									236081_at	SNCA
				235613_at	235613_at									236166_at	LOC285147
				235634_at	PURG									236180_at	236180_at
				235640_at	235640_at									236266_at	RORA
				235646_at	235646_at									236300_at	PDE3A
				235654_at	TMEM218									236351_at	LOC389023
				235664_at	235664_at									236480_at	MIR210HG
				235679_at	235679_at									236488_s_at	236488_s_at
				235693_at	235693_at									236542_at	236542_at
				235697_at	235697_at									236597_at	UGT3A1
				235701_at	235701_at									236692_at	236692_at
				235719_at	CYP4V2									236718_at	MYO10
				235721_at	DTX3									236771_at	RIPPLY2
				235727_at	KLHL28									236834_at	SCFD2
				235751_s_at	VMO1									236894_at	L1TD1
				235752_at	235752_at									237034_at	237034_at
				235762_at	TAS2R14									237056_at	INSC
				235780_at	PRKACB									237159_x_at	AP1S3
				235791_x_at	CHD1									237329_at	237329_at
				235826_at	235826_at									237411_at	ADAMTS6
				235829_at	CAHM									237552_at	LOC100505817
				235841_at	235841_at									237572_at	UGT3A1
				235846_at	235846_at									237593_at	237593_at
				235876_at	TMEM218									237946_at	237946_at
				235890_at	TBL1XR1									238018_at	FAM150B
				235925_at	235925_at									238066_at	RBP7
				235927_at	XPO1									238067_at	TBC1D8B
				235939_at	235939_at									238194_at	DGKK
				235970_at	LCORL									238197_at	GATA5
				235980_at	PIK3CA									238205_at	DCAF12L1
				236006_s_at	AKAP10									238417_at	PGM2L1
				236007_at	AKAP10									238447_at	RBMS3
				236030_at	RCOR2									238454_at	ZNF540
				236032_at	236032_at									238462_at	UBASH3B
				236059_at	LOC100130428									238480_at	TTC39C
				236062_at	236062_at									238532_at	DPF3
				236105_at	ZBTB10									238537_at	CA8
				236124_at	LOC153546									238546_at	SLC8A1
				236126_at	ACVR2B									238584_at	IQCA1
				236133_x_at	ZNF254									238587_at	UBASH3B
				236164_at	FLJ10038									238590_x_at	TMEM107
				236165_at	MSL3									238592_at	238592_at
				236181_at	LOC389831									238632_at	LOC100505946
				236219_at	SLC35G1									238750_at	CCL28
				236229_at	236229_at									238850_at	238850_at
				236236_at	WNK3									238865_at	PABPC4L
				236241_at	MED31									238877_at	EYA4
				236251_at	236251_at									238909_at	S100A10
				236253_at	ZNF546									238969_at	C3orf55
				236267_at	ZNF346									239066_at	239066_at
				236270_at	NFATC4									239108_at	FAR2
				236292_at	RNF130									239127_at	LOC100288860
				236294_at	HUWE1									239218_at	PDE1C
				236307_at	236307_at									239302_s_at	LOC100506922
				236316_at	FAM3C									239319_at	LINC00992
				236317_at	236317_at									239410_at	239410_at
				236343_at	236343_at									239533_at	GPR155
				236353_at	236353_at									239624_at	239624_at
				236355_s_at	236355_s_at									239738_at	DACH2
				236379_at	236379_at									239824_s_at	TMEM107
				236408_at	236408_at									239911_at	ONECUT2
				236431_at	U2SURP									239988_at	239988_at
				236435_at	236435_at									240055_at	240055_at
				236437_at	236437_at									240186_at	240186_at
				236438_at	236438_at									240233_at	LOC100506714
				236462_at	236462_at									240236_at	STXBP5L
				236466_at	236466_at									240301_at	DPPA2
				236472_at	236472_at									240382_at	240382_at
				236484_at	236484_at									240655_at	240655_at
				236500_at	236500_at									240815_at	240815_at
				236501_at	236501_at									240944_at	240944_at
				236517_at	MEGF10									240983_s_at	CARS
				236520_at	SDCBP2-AS1									241198_s_at	C11orf70
				236524_at	236524_at									241440_at	241440_at
				236545_at	236545_at									241550_at	DPPA5
				236555_at	TRAF3IP2-AS1									241703_at	RUNDC3B
				236560_at	LOC100129884									241706_at	CPNE8
				236561_at	TGFBR1									241756_at	241756_at
				236621_at	RPS27									241789_at	RBMS3
				236650_at	236650_at									241807_x_at	241807_x_at
				236654_s_at	236654_s_at									241866_at	SLC16A7
				236655_at	TPD52									241873_at	241873_at
				236664_at	AKT2									241937_s_at	WDR4
				236668_at	236668_at									242136_x_at	MGC70870
				236696_at	U2SURP									242153_at	LARP1B
				236778_at	236778_at									242263_at	TMED5
				236781_at	236781_at									242297_at	RREB1
				236796_at	236796_at									242324_x_at	CCBE1
				236798_at	LINC00888									242344_at	GABRB2
				236815_at	236815_at									242346_x_at	242346_x_at
				236816_at	NAA25									242348_at	FAM19A4
				236836_at	236836_at									242442_x_at	TRMT10A
				236850_at	CAPRIN1									242447_at	C3orf70
				236879_at	236879_at									242463_x_at	ZNF600
				236882_at	236882_at									242477_at	TTC39B
				236883_at	236883_at									242486_at	242486_at
				236885_at	MEX3A									242500_at	242500_at
				236917_at	LRRC34									242722_at	LMO7
				236918_s_at	LRRC34									242727_at	ARL5B
				236924_at	236924_at									242814_at	SERPINB9
				236948_x_at	SRSF11									242874_at	242874_at
				236953_s_at	NHLRC3									242909_at	242909_at
				236961_at	236961_at									243038_at	RBM43
				236966_at	236966_at									243109_at	MCTP2
				236974_at	236974_at									243198_at	TEX9
				236975_at	236975_at									243356_at	243356_at
				236978_at	236978_at									243357_at	NEGR1
				237040_at	CWF19L2									243529_at	MARS2
				237051_at	237051_at									243555_at	243555_at
				237096_at	237096_at									243610_at	C9orf135
				237107_at	PRKRA									243805_at	CCBE1
				237119_at	237119_at									243974_at	243974_at
				237121_at	237121_at									244033_at	CEP128
				237184_at	237184_at									244050_at	PTPLAD2
				237194_at	237194_at									244264_at	KLRG2
				237198_at	237198_at									244297_at	244297_at
				237291_at	PRORSD1P									244306_at	244306_at
				237305_at	237305_at									244509_at	GPR155
				237322_at	MIAT									244650_at	FAM105A
				237330_at	237330_at									244689_at	PPARA
				237333_at	RBBP4									244764_at	HIVEP3
				237347_at	237347_at									32091_at	SLC25A44
				237376_at	237376_at									33322_i_at	SFN
				237388_at	237388_at									33323_r_at	SFN
				237419_at	237419_at									36830_at	MIPEP
				237448_at	237448_at									37549_g_at	BBS9
				237459_at	237459_at									37892_at	COL11A1
				237469_at	TOP2A									37950_at	PREP
				237476_at	237476_at									41037_at	TEAD4
				237483_at	237483_at									43511_s_at	ARRB1
				237491_at	237491_at									44790_s_at	KIAA0226L
				237539_at	237539_at									49111_at	ARRB1
				237560_at	MRPS5									50221_at	TFEB
				237571_at	237571_at									50965_at	RAB26
				237594_at	237594_at									58916_at	58916_at
				237600_at	237600_at									63009_at	SHQ1
				237663_at	237663_at									65585_at	FAM86B1
				237673_at	237673_at									89948_at	PCIF1
				237703_at	237703_at
				237716_at	237716_at
				237803_x_at	237803_x_at
				237841_at	237841_at
				237864_at	237864_at
				237885_at	SOX21-AS1
				237895_at	237895_at
				237936_at	237936_at
				238000_at	238000_at
				238053_at	DHRSX
				238069_at	238069_at
				238070_at	CHD1L
				238076_at	GATAD2B
				238081_at	WDFY3-AS2
				238098_at	238098_at
				238108_at	238108_at
				238115_at	DNAJC18
				238121_at	GK5
				238129_s_at	FZD2
				238154_at	CEP70
				238243_at	238243_at
				238277_at	238277_at
				238289_at	238289_at
				238318_at	238318_at
				238323_at	TEAD2
				238420_at	TAOK1
				238444_at	ZNF618
				238456_at	LOC100289230
				238466_at	238466_at
				238468_at	TNRC6B
				238476_at	CREBRF
				238492_at	238492_at
				238501_at	238501_at
				238612_at	238612_at
				238620_at	238620_at
				238635_at	C5orf28
				238651_at	238651_at
				238656_at	238656_at
				238659_at	KIAA0141
				238661_at	LINC00966
				238669_at	PTGS1
				238681_at	GDPD1
				238711_s_at	ZNF148
				238735_at	238735_at
				238768_at	C2orf68
				238774_at	238774_at
				238785_at	238785_at
				238810_at	RFX3
				238825_at	ACRC
				238838_at	TCERG1
				238860_at	OARD1
				238875_at	238875_at
				238878_at	ARX
				238886_at	TMED10
				238902_at	238902_at
				238913_at	238913_at
				238949_at	RNF145
				238951_at	238951_at
				238982_at	DENR
				238988_at	238988_at
				239005_at	239005_at
				239008_at	239008_at
				239014_at	CCAR1
				239017_at	239017_at
				239024_at	ZNF148
				239033_at	239033_at
				239049_at	239049_at
				239050_s_at	239050_s_at
				239082_at	FZD3
				239121_at	239121_at
				239129_at	239129_at
				239130_at	239130_at
				239131_at	239131_at
				239151_at	239151_at
				239163_at	UBE2B
				239165_at	239165_at
				239175_at	239175_at
				239178_at	FGF9
				239207_at	KDM5C
				239223_s_at	FBXL20
				239227_at	239227_at
				239228_at	239228_at
				239232_at	MSI2
				239238_at	239238_at
				239242_at	SLC25A5-AS1
				239243_at	ZNF638
				239245_at	239245_at
				239246_at	FARP1
				239264_at	239264_at
				239280_at	239280_at
				239295_at	SRSF12
				239296_at	239296_at
				239301_at	239301_at
				239347_at	239347_at
				239348_at	239348_at
				239383_at	239383_at
				239387_at	239387_at
				239393_at	239393_at
				239396_at	239396_at
				239404_at	239404_at
				239411_at	239411_at
				239432_at	FLJ31306
				239442_at	CEP68
				239469_at	239469_at
				239489_at	239489_at
				239504_at	239504_at
				239512_at	SRSF4
				239536_at	239536_at
				239545_at	239545_at
				239556_at	LOC645513
				239559_at	239559_at
				239577_at	239577_at
				239591_at	239591_at
				239597_at	239597_at
				239605_x_at	239605_x_at
				239621_at	239621_at
				239630_at	239630_at
				239646_at	239646_at
				239649_at	239649_at
				239654_at	CHD9
				239661_at	239661_at
				239679_at	239679_at
				239682_at	239682_at
				239716_at	239716_at
				239721_at	239721_at
				239725_at	PGAP1
				239735_at	239735_at
				239758_at	239758_at
				239761_at	GCNT1
				239780_at	239780_at
				239784_at	239784_at
				239804_at	239804_at
				239808_at	239808_at
				239815_at	239815_at
				239843_at	RIT1
				239863_at	239863_at
				239867_at	239867_at
				239886_at	239886_at
				239897_at	BCLAF1
				239907_at	239907_at
				239917_at	239917_at
				239937_at	ZNF207
				239943_x_at	239943_x_at
				239944_at	239944_at
				239969_at	239969_at
				240000_at	240000_at
				240006_at	240006_at
				240044_x_at	TNRC6B
				240062_at	FAM3C
				240084_at	CBX2
				240094_at	240094_at
				240105_at	240105_at
				240108_at	240108_at
				240127_at	240127_at
				240128_at	240128_at
				240141_at	240141_at
				240146_at	240146_at
				240153_at	ILDR2
				240154_at	240154_at
				240155_x_at	ZNF493
				240165_at	240165_at
				240168_at	XPO7
				240170_at	240170_at
				240172_at	ERGIC2
				240184_at	SYNPR-AS1
				240231_at	240231_at
				240247_at	240247_at
				240248_at	240248_at
				240259_at	240259_at
				240263_at	240263_at
				240309_at	240309_at
				240314_at	240314_at
				240321_at	240321_at
				240332_at	240332_at
				240445_at	240445_at
				240485_at	240485_at
				240499_at	240499_at
				240502_at	240502_at
				240503_at	240503_at
				240521_at	PLK1S1
				240527_at	240527_at
				240528_s_at	EXOC4
				240542_at	240542_at
				240545_at	LOC286382
				240547_at	240547_at
				240558_at	240558_at
				240580_at	240580_at
				240592_at	LCORL
				240600_at	240600_at
				240601_at	240601_at
				240602_at	HBS1L
				240636_at	240636_at
				240637_at	WDR41
				240642_at	ZMYM2
				240652_at	240652_at
				240759_at	240759_at
				240845_at	240845_at
				240859_at	ZFYVE16
				240866_at	240866_at
				240867_at	240867_at
				240868_at	LOC100129406
				240869_at	240869_at
				240913_at	FGFR2
				240926_at	LRCH3
				240965_at	240965_at
				241017_at	241017_at
				241060_x_at	241060_x_at
				241106_at	241106_at
				241219_at	241219_at
				241242_at	241242_at
				241376_at	241376_at
				241387_at	241387_at
				241388_at	241388_at
				241391_at	241391_at
				241417_at	241417_at
				241434_at	241434_at
				241438_at	241438_at
				241457_at	241457_at
				241489_at	241489_at
				241509_at	241509_at
				241586_at	241586_at
				241590_at	241590_at
				241595_at	241595_at
				241627_x_at	ARHGEF40
				241683_at	HECTD1
				241692_at	241692_at
				241699_at	241699_at
				241728_at	241728_at
				241750_x_at	241750_x_at
				241761_at	241761_at
				241769_at	241769_at
				241774_at	FLJ31306
				241786_at	241786_at
				241790_at	241790_at
				241798_at	241798_at
				241818_at	241818_at
				241826_x_at	ZNF738
				241829_at	FAM124A
				241845_at	241845_at
				241851_x_at	LOC100130429
				241863_x_at	241863_x_at
				241867_at	241867_at
				241891_at	241891_at
				241903_at	241903_at
				241906_at	241906_at
				241924_at	MECP2
				241938_at	QKI
				241962_at	241962_at
				241970_at	241970_at
				241996_at	RUFY2
				241997_at	241997_at
				242007_at	242007_at
				242014_at	242014_at
				242021_at	XBP1
				242028_at	ZNF709
				242064_at	SDK2
				242065_x_at	IDI1
				242080_at	242080_at
				242087_x_at	MFI2-AS1
				242096_at	242096_at
				242110_at	242110_at
				242125_at	242125_at
				242142_at	242142_at
				242143_at	242143_at
				242144_at	242144_at
				242167_at	242167_at
				242193_at	LINC00966
				242202_at	242202_at
				242239_at	ARL5B-AS1
				242243_at	TMF1
				242253_at	PPP5D1
				242292_at	FAM226B
				242336_at	GSK3B
				242361_at	242361_at
				242362_at	242362_at
				242390_at	242390_at
				242403_at	242403_at
				242418_at	C2orf27A
				242423_x_at	242423_x_at
				242427_at	WAC
				242428_at	242428_at
				242434_at	242434_at
				242470_at	EID2B
				242472_x_at	FNBP4
				242480_at	242480_at
				242482_at	PRKAR1A
				242490_at	242490_at
				242498_x_at	242498_x_at
				242512_at	MYO9A
				242518_at	RAD51-AS1
				242523_at	242523_at
				242529_x_at	242529_x_at
				242540_at	DNHD1
				242555_at	C16orf87
				242558_at	242558_at
				242572_at	242572_at
				242586_at	FSD1L
				242593_at	242593_at
				242607_at	242607_at
				242611_at	242611_at
				242612_at	242612_at
				242637_at	242637_at
				242645_at	242645_at
				242646_at	242646_at
				242650_at	242650_at
				242663_at	LINC00662
				242712_x_at	242712_x_at
				242737_at	242737_at
				242750_at	MMAA
				242751_at	242751_at
				242759_at	242759_at
				242766_at	242766_at
				242797_x_at	242797_x_at
				242807_at	FSD1L
				242829_x_at	242829_x_at
				242837_at	SRSF4
				242840_at	242840_at
				242847_at	C11orf30
[truncated: 171 more rows]
